# Supplementary material
Source: Research Square preprint supplement (doi:10.21203/rs.3.rs-9012196/v1)
Supplement: Supplementary file 1 [file 6c7bcdb84441805dff96f714.xlsx]

## Sheet: PERCEIVED SAFETY, EFFECTIVEN...
start	end	Gender	Age	Marital status	Highest Educational Attainment	Religion	Role	Years of experience	Are you aware of the R21-MATRIX-M MALARIA VACCINE?	I believe the R21-MATRIX-M MALARIA VACCINE is safe for children	I am concerned about potential side effects of the R21-MATRIX-M MALARIA VACCINE	I have confidence in the Clinical trials conducted for the R21-MATRIX-M MALARIA VACCINE	I believe the benefits of the R21-MATRIX-M MALARIA VACCINE outweighs it's risk	I trust the safety information provided by health authorities regarding the R21-MATRIX-M MALARIA VACCINE	I believe the R21-MATRIX-M MALARIA VACCINE is effective in preventing MALARIA in children	I think the R21-MATRIX-M MALARIA VACCINE will reduce the incidence of MALARIA in our community	I trust the effectiveness data presented in the research studies on the R21-MATRIX-M MALARIA VACCINE	I believe the R21-MATRIX-M MALARIA VACCINE will have a long-term impact on malaria eradication	I believe the R21-MATRIX-M MALARIA VACCINE will help in the reduction of morbidity and mortality associated with malaria	I am willing to recommend the R21-MATRIX-M MALARIA VACCINE to parents for their children	I would be willing to have my own children vaccinated with the R21-MATRIX-M MALARIA VACCINE	I would be willing to administer the R21-MATRIX-M MALARIA VACCINE in my practice	I believe parents in my community will accept the R21-MATRIX-M MALARIA VACCINE	I think the availability of the R21-MATRIX-M MALARIA VACCINE in local health facilities is important	What barriers do you foresee in recommending the R21-MATRIX-M MALARIA VACCINE?	What barriers do you foresee in recommending the R21-MATRIX-M MALARIA VACCINE?/Lack of sufficient information about the vaccine	What barriers do you foresee in recommending the R21-MATRIX-M MALARIA VACCINE?/Concerns about safety	What barriers do you foresee in recommending the R21-MATRIX-M MALARIA VACCINE?/Concerns about effectively	What barriers do you foresee in recommending the R21-MATRIX-M MALARIA VACCINE?/Cost of the vaccine	What barriers do you foresee in recommending the R21-MATRIX-M MALARIA VACCINE?/Parental resistance	What barriers do you foresee in recommending the R21-MATRIX-M MALARIA VACCINE?/Cultural beliefs and practices	What barriers do you foresee in recommending the R21-MATRIX-M MALARIA VACCINE?/Limited availability of the vaccine	What barriers do you foresee in recommending the R21-MATRIX-M MALARIA VACCINE?/Lack of trust in healthcare providers	What barriers do you foresee in recommending the R21-MATRIX-M MALARIA VACCINE?/Negative media reports	What factors would encourage you to recommend the R21-MATRIX-M MALARIA VACCINE	What factors would encourage you to recommend the R21-MATRIX-M MALARIA VACCINE /Positive clinical trial results	What factors would encourage you to recommend the R21-MATRIX-M MALARIA VACCINE /Endorsement by health authorities	What factors would encourage you to recommend the R21-MATRIX-M MALARIA VACCINE /Cost effectiveness	What factors would encourage you to recommend the R21-MATRIX-M MALARIA VACCINE /High demand from parents	What factors would encourage you to recommend the R21-MATRIX-M MALARIA VACCINE /Health education and awareness campaigns	What factors would encourage you to recommend the R21-MATRIX-M MALARIA VACCINE /Government support and subsidies	What factors would encourage you to recommend the R21-MATRIX-M MALARIA VACCINE /Availability in local health facilities	What factors would encourage you to recommend the R21-MATRIX-M MALARIA VACCINE /Trust in healthcare providers	What factors would encourage you to recommend the R21-MATRIX-M MALARIA VACCINE /Positive media coverage	_id	_uuid	_submission_time	_validation_status	_notes
2024-10-24 09:15:34	2024-10-24 09:17:25	Female	21-30 years	Single	Bachelor's degree	Christianity	Nurse	1-5 years	Yes	Strongly agree	Agree	Agree	Strongly agree	Agree	Agree	Strongly agree	Agree	Agree	Strongly agree	Agree	Agree		Agree	Strongly agree	Parental resistance	0	0	0	0	1	0	0	0	0	Health education and awareness campaigns	0	0	0	0	1	0	0	0	0	398916944	d1240517-ad70-43b4-8aec-8ddf71d43c21	2024-10-24 08:17:26
2024-10-24 09:17:25	2024-10-24 09:19:24	Female	31-40 years	Single	National Diploma	Christianity	Nurse	6-10 years	Yes	Strongly agree	Agree	Agree	Agree	Agree	Agree	Agree	Agree	Agree	Agree	Agree	Agree	Agree	Agree																						398917781	c2c370c6-b6e4-4075-b531-ee2534da913f	2024-10-24 08:19:28
2024-10-24 09:19:24	2024-10-24 09:21:18	Female	41-50 years	Married		Christianity	Nurse practitioner	11-15 years	Yes	Agree	Agree	Agree	Agree	Agree	Agree	Agree	Agree	Agree	Agree	Agree	Agree		Agree	Agree	Parental resistance	0	0	0	0	1	0	0	0	0	Positive media coverage	0	0	0	0	0	0	0	0	1	398918631	762754e8-ebbc-460b-81e8-5b3c41cf6418	2024-10-24 08:21:19
2024-10-24 09:21:18	2024-10-24 09:23:22	Female	21-30 years	Single	National Diploma	Christianity	Nurse	6-10 years	Yes	Strongly agree	Strongly agree		Agree	Agree	Agree		Agree	Agree	Agree			Agree	Agree	Agree	Concerns about effectively Negative media reports	0	0	1	0	0	0	0	0	1	Positive clinical trial results Endorsement by health authorities Health education and awareness campaigns Government support and subsidies Positive media coverage	1	1	0	0	1	1	0	0	1	398919678	fd0ee4a9-5c4c-4479-b099-29da1eb1a354	2024-10-24 08:23:24
2024-10-24 09:23:22	2024-10-24 09:25:04	Female	31-40 years	Single	Bachelor's degree	Christianity	Nurse	6-10 years	Yes	Strongly agree	Agree	Agree				Agree		Agree				Agree		Agree																					398920329	9fe8737a-9a41-4ace-ad89-2f1bfb9a6001	2024-10-24 08:25:06
2024-10-24 09:25:04	2024-10-24 09:26:41	Male	31-40 years	Married	Bachelor's degree	Christianity	Laboratory technician	6-10 years	Yes	Strongly agree		Agree	Agree	Agree	Agree	Agree	Agree	Agree	Agree	Agree	Agree	Agree	Agree	Agree	Concerns about effectively	0	0	1	0	0	0	0	0	0	Government support and subsidies	0	0	0	0	0	1	0	0	0	398920971	aba4268b-2547-454f-80d7-5723b5c5a60e	2024-10-24 08:26:42
2024-10-24 09:26:42	2024-10-24 09:28:19	Female	21-30 years	Single		Christianity	Nurse	6-10 years	Yes	Strongly agree	Agree	Agree	Agree	Agree	Agree	Agree	Agree	Agree	Agree	Agree	Agree	Agree	Agree	Agree	Parental resistance	0	0	0	0	1	0	0	0	0	Positive media coverage	0	0	0	0	0	0	0	0	1	398921527	cc7e2cb8-3be1-4365-bffb-2eeb625cef59	2024-10-24 08:28:20
2024-10-24 09:28:19	2024-10-24 09:30:08	Female	31-40 years		Bachelor's degree	Christianity	Pharmacist	6-10 years	Yes	Strongly agree	Agree	Agree	Agree		Agree		Agree		Agree	Agree	Agree	Agree	Agree	Agree	Lack of sufficient information about the vaccine Parental resistance	1	0	0	0	1	0	0	0	0	Positive clinical trial results Government support and subsidies Availability in local health facilities Positive media coverage	1	0	0	0	0	1	1	0	1	398922199	63075b85-d9d9-4aab-9112-a88e68b5becc	2024-10-24 08:30:09
2024-10-24 13:52:21	2024-10-24 13:55:06	Female	21-30 years	Single	National Diploma	Christianity	Nurse	6-10 years	Yes	Strongly agree	Agree	Agree		Agree	Agree			Agree		Agree		Agree		Agree	Parental resistance	0	0	0	0	1	0	0	0	0	Health education and awareness campaigns Positive media coverage	0	0	0	0	1	0	0	0	1	399228401	e93afc5b-0613-4c0c-b159-bcd7d0e7b6aa	2024-10-24 20:55:06
2024-10-24 13:55:06	2024-10-24 13:58:09	Female	21-30 years	Single	Bachelor's degree	Christianity	Pharmacist	6-10 years	Yes	Strongly agree	Agree	Agree	Agree	Agree	Strongly agree	Agree	Agree	Agree	Agree	Strongly agree	Agree	Agree	Agree	Agree	Cultural beliefs and practices	0	0	0	0	0	1	0	0	0	Health education and awareness campaigns	0	0	0	0	1	0	0	0	0	399229052	5e9823b0-7c1a-4bed-b7f5-cb4f4ab30cc2	2024-10-24 20:58:10
2024-10-24 13:58:09	2024-10-24 14:00:48	Male	41-50 years	Married	Master's degree	Christianity	Pharmacist	6-10 years	Yes	Agree	Agree	Agree	Agree	Agree	Agree	Agree	Agree	Agree	Agree	Agree	Agree	Agree	Agree	Agree	Parental resistance	0	0	0	0	1	0	0	0	0	Health education and awareness campaigns Availability in local health facilities	0	0	0	0	1	0	1	0	0	399229710	90f101d3-92ad-4b69-a20a-fd84b170e033	2024-10-24 21:00:48
2024-10-24 14:00:48	2024-10-24 14:03:41	Female	31-40 years	Married	Bachelor's degree	Christianity	Pediatric doctor	6-10 years	Yes	Agree	Agree	Agree	Agree	Agree	Agree	Agree		Agree	Agree	Agree	Agree	Agree	Agree	Agree	Parental resistance	0	0	0	0	1	0	0	0	0	Health education and awareness campaigns Positive media coverage	0	0	0	0	1	0	0	0	1	399230455	d2ce9021-11cd-4d82-b7ed-9cc6fabd715b	2024-10-24 21:03:41
2024-10-24 14:03:41	2024-10-24 14:06:23	Female	41-50 years	Married	Master's degree	Christianity	Nurse practitioner	6-10 years	Yes	Agree	Agree	Agree	Agree	Agree	Agree	Agree	Agree	Agree	Agree	Agree	Agree	Agree	Agree	Agree	Parental resistance Lack of trust in healthcare providers	0	0	0	0	1	0	0	1	0	High demand from parents Government support and subsidies Positive media coverage	0	0	0	1	0	1	0	0	1	399231089	d077087d-9230-4169-9657-5890e45461d0	2024-10-24 21:06:24
2024-10-24 14:06:23	2024-10-24 14:09:09	Female	31-40 years			Christianity	Nurse	6-10 years	Yes	Agree	Agree	Agree	Agree	Agree	Agree	Agree	Agree	Agree	Agree	Agree	Agree	Agree	Agree	Agree	Parental resistance	0	0	0	0	1	0	0	0	0	High demand from parents Government support and subsidies Trust in healthcare providers	0	0	0	1	0	1	0	1	0	399231646	869bbf65-5669-442c-b474-fe2a4b925780	2024-10-24 21:09:09
2024-10-24 14:09:09	2024-10-24 14:11:29	Female	31-40 years	Married		Christianity	Nurse	6-10 years	Yes	Agree		Agree		Agree	Agree		Agree	Agree	Agree	Agree	Agree	Agree	Agree	Agree																					399232186	6b63a32d-0478-42d0-af44-79bce1494ca1	2024-10-24 21:11:29
2024-10-24 14:11:29	2024-10-24 14:13:42	Male	31-40 years	Single	Bachelor's degree	Christianity	Laboratory technician	6-10 years	Yes	Agree	Agree	Agree	Agree	Agree	Agree	Agree	Agree	Agree	Agree	Agree	Agree	Agree	Agree	Agree	Lack of sufficient information about the vaccine	1	0	0	0	0	0	0	0	0	Endorsement by health authorities	0	1	0	0	0	0	0	0	0	399232689	d62f27be-8703-4902-bd97-cecf6f920739	2024-10-24 21:13:43
2024-10-24 14:13:43	2024-10-24 14:17:23	Female	41-50 years	Married		Christianity	Nurse practitioner	6-10 years	Yes	Agree		Agree	Agree	Agree	Agree	Agree	Agree	Agree	Agree	Strongly agree	Agree	Agree	Agree	Disagree	Parental resistance	0	0	0	0	1	0	0	0	0											399233410	0219cf59-e0b7-4dce-9b54-c576f377fda1	2024-10-24 21:17:23
2024-10-24 14:17:23	2024-10-24 14:22:25	Female	31-40 years	Married		Christianity	Nurse	6-10 years	Yes	Agree	Disagree	Agree	Agree	Agree		Agree	Agree		Agree	Agree	Agree	Agree	Agree	Agree	Parental resistance	0	0	0	0	1	0	0	0	0	Trust in healthcare providers	0	0	0	0	0	0	0	1	0	399234490	84740ca8-3e58-4f6e-8e1c-690c4fa05421	2024-10-24 21:22:26
2024-10-24 14:22:25	2024-10-24 14:24:25	Male	21-30 years	Single	Bachelor's degree	Christianity	Laboratory technician	6-10 years	Yes	Agree	Agree	Agree	Agree	Agree	Agree	Agree	Agree	Agree	Agree	Agree	Agree	Agree	Agree	Agree	Parental resistance	0	0	0	0	1	0	0	0	0	Health education and awareness campaigns	0	0	0	0	1	0	0	0	0	399234843	a8267cae-30a4-4c1e-8682-958a8ed6a54a	2024-10-24 21:24:25
2024-10-24 14:24:25	2024-10-24 14:26:32	Male	41-50 years	Married	Master's degree	Christianity	Pharmacist	11-15 years	Yes	Agree	Agree	Agree	Agree	Agree	Agree	Agree	Agree		Agree	Agree	Agree	Agree	Agree	Agree																					399235297	4ae32761-c8cd-4886-be10-4b4181199b35	2024-10-24 21:26:34
2024-10-24 14:26:33	2024-10-24 14:28:27	Female	31-40 years	Married	Bachelor's degree	Christianity	Nurse practitioner	6-10 years	Yes	Agree	Agree	Agree	Agree	Agree	Agree	Agree	Agree	Agree	Agree	Agree	Agree	Agree	Agree	Agree																					399235689	972302ec-dbed-4949-acef-2a0fcee8371d	2024-10-24 21:28:32
2024-10-24 14:28:27	2024-10-24 14:30:50	Female	31-40 years	Single	National Diploma	Christianity	Nurse	1-5 years	Yes	Agree	Agree	Agree	Agree	Agree	Agree	Agree	Agree	Agree	Agree	Agree	Agree	Agree	Agree	Agree																					399236292	b3a104e5-e24b-4856-b8c6-f925c8591851	2024-10-24 21:30:52
2024-10-24 14:30:50	2024-10-24 14:32:39	Male	31-40 years	Single	Bachelor's degree	Christianity	Laboratory technician	6-10 years	Yes	Strongly agree	Agree	Agree	Agree	Agree	Agree	Agree		Agree	Agree	Agree	Agree	Agree	Agree	Agree																					399236779	132fad38-8784-490b-aebd-e842cc1fdd1f	2024-10-24 21:32:39
2024-10-24 14:32:39	2024-10-24 14:34:40	Male	41-50 years	Married	Master's degree	Christianity	Pharmacist	11-15 years	Yes	Agree	Agree	Agree	Agree	Agree	Agree	Agree	Agree	Agree	Agree	Agree	Agree	Agree	Agree	Agree	Concerns about safety	0	1	0	0	0	0	0	0	0	Health education and awareness campaigns	0	0	0	0	1	0	0	0	0	399237213	a8137d5d-3602-4188-a414-75fb19d8c6c7	2024-10-24 21:34:41
2024-10-24 14:34:40	2024-10-24 14:37:21	Female	31-40 years	Married	National Diploma	Christianity	Nurse	6-10 years	Yes	Agree	Agree	Agree	Agree	Agree	Agree		Agree		Agree	Agree	Agree	Agree	Agree	Agree	Parental resistance	0	0	0	0	1	0	0	0	0	Trust in healthcare providers	0	0	0	0	0	0	0	1	0	399237871	2dc405d4-3854-4ed8-8862-032cad4cfc8f	2024-10-24 21:37:22
2024-10-24 14:37:21	2024-10-24 14:40:21	Female	31-40 years	Single	National Diploma	Christianity	Pharmacist	1-5 years	Yes	Strongly agree	Agree	Agree	Agree	Agree	Agree	Agree	Agree	Agree	Agree		Agree	Agree																							399238419	dc2e81cd-2537-4574-b17f-d7c51251c907	2024-10-24 21:40:21
2024-10-24 14:40:21	2024-10-24 14:44:07	Female	41-50 years	Married	Bachelor's degree	Christianity	Nurse practitioner	6-10 years	Yes	Strongly agree	Agree	Agree	Agree	Agree	Agree	Agree		Agree	Agree	Agree	Agree	Agree		Agree																					399239054	47b25de9-816b-474e-9d28-9eedc0f4745e	2024-10-24 21:44:07
2024-10-24 14:44:07	2024-10-24 14:46:52	Female	31-40 years	Single	National Diploma	Christianity	Nurse	1-5 years	Yes	Strongly agree	Agree	Agree		Agree	Agree	Agree	Agree	Agree	Agree	Agree	Agree	Agree	Agree	Agree																					399239534	c7b5366b-f730-4047-be42-2949d33967ad	2024-10-24 21:46:54
2024-10-24 14:46:53	2024-10-24 14:54:40	Male	41-50 years	Married	Master's degree	Christianity	Public Health practitioner	6-10 years	Yes	Strongly agree	Agree	Agree	Agree	Agree	Agree	Agree	Agree	Agree	Agree	Agree	Agree	Agree	Agree	Agree	Cultural beliefs and practices Limited availability of the vaccine	0	0	0	0	0	1	1	0	0	Positive clinical trial results Endorsement by health authorities Health education and awareness campaigns Positive media coverage	1	1	0	0	1	0	0	0	1	399240811	6d956545-9080-4feb-aee9-42a4f4e04658	2024-10-24 21:54:40
2024-10-24 14:54:40	2024-10-24 14:57:44	Female	31-40 years	Married	National Diploma	Christianity	Nurse	1-5 years	Yes	Strongly agree	Agree	Agree	Agree	Agree	Agree	Agree	Agree	Agree	Agree	Agree	Agree	Agree	Agree	Agree																					399241267	b72b7460-0801-4de6-8c6f-82f283867e24	2024-10-24 21:57:45
2024-10-24 14:57:44	2024-10-24 15:00:20	Female	31-40 years	Married	Bachelor's degree	Christianity	Nurse practitioner	6-10 years	Yes	Agree	Agree	Agree	Agree	Agree	Agree	Agree	Agree	Agree	Agree	Agree	Agree	Agree	Agree	Agree	Parental resistance	0	0	0	0	1	0	0	0	0	Cost effectiveness Health education and awareness campaigns Trust in healthcare providers Positive media coverage	0	0	1	0	1	0	0	1	1	399241675	75f894a8-7705-45fe-b28a-625ca0fe240c	2024-10-24 22:00:20
2024-10-24 15:00:20	2024-10-24 15:04:51	Male	31-40 years	Married	Master's degree	Christianity	Pediatric doctor	6-10 years	Yes	Strongly agree	Agree	Agree	Agree	Agree	Agree	Agree	Agree	Agree	Agree	Agree	Agree	Agree	Agree	Agree	Lack of sufficient information about the vaccine Limited availability of the vaccine	1	0	0	0	0	0	1	0	0	Positive clinical trial results Availability in local health facilities Positive media coverage	1	0	0	0	0	0	1	0	1	399242434	660aa720-1ca7-4a17-8141-05eef2b82b17	2024-10-24 22:04:53
2024-10-24 15:04:51	2024-10-24 15:08:31	Male	41-50 years	Married	Master's degree	Christianity	Public Health practitioner	6-10 years	Yes	Strongly agree	Agree	Agree	Agree	Agree	Agree	Agree	Agree	Agree	Agree	Agree	Agree	Agree	Agree	Agree	Lack of sufficient information about the vaccine Cultural beliefs and practices Lack of trust in healthcare providers Negative media reports	1	0	0	0	0	1	0	1	1	Positive clinical trial results Endorsement by health authorities Cost effectiveness High demand from parents Health education and awareness campaigns Availability in local health facilities Positive media coverage	1	1	1	1	1	0	1	0	1	399243074	d287bf19-f64a-4297-a098-a4d6895c3bbb	2024-10-24 22:08:34
2024-10-24 15:08:31	2024-10-24 15:13:19	Male	21-30 years	Single	Master's degree	Christianity	Public Health practitioner	1-5 years	Yes	Agree	Agree	Agree	Agree	Agree	Agree	Agree	Agree	Agree	Agree	Agree	Agree	Agree	Agree	Agree	Lack of sufficient information about the vaccine	1	0	0	0	0	0	0	0	0	Health education and awareness campaigns	0	0	0	0	1	0	0	0	0	399243774	cdfdf24a-207e-4b2c-bfa0-aa2ca369d3e3	2024-10-24 22:13:20
2024-10-24 15:13:20	2024-10-24 15:19:36	Female	Less than 20 years	Single	National Diploma	Christianity	Nurse	1-5 years	Yes	Agree		Agree	Agree	Agree	Agree	Agree	Agree	Agree	Agree	Agree	Disagree	Disagree	Disagree	Agree	Concerns about safety	0	1	0	0	0	0	0	0	0	Health education and awareness campaigns	0	0	0	0	1	0	0	0	0	399244563	7bc76cfc-b0a2-4a26-acca-e64fe27810f9	2024-10-24 22:19:43
2024-10-24 15:19:36	2024-10-24 15:23:05	Male	21-30 years	Single		Christianity	Nurse		No		Strongly agree	Agree	Agree		Agree	Agree	Agree	Agree	Agree	Agree	Agree	Agree	Agree	Agree	Concerns about safety Concerns about effectively Cost of the vaccine Parental resistance Lack of trust in healthcare providers Negative media reports	0	1	1	1	1	0	0	1	1	Positive clinical trial results Endorsement by health authorities Cost effectiveness Government support and subsidies Trust in healthcare providers Positive media coverage	1	1	1	0	0	1	0	1	1	399245081	4070d321-a43e-430c-a1ba-c7059de15637	2024-10-24 22:23:06
2024-10-24 15:23:05	2024-10-24 15:26:04	Female	Less than 20 years	Single		Christianity	Nurse		No		Strongly agree	Agree	Agree		Agree	Agree	Agree	Agree	Agree	Agree	Agree	Agree	Agree	Agree	Concerns about safety Concerns about effectively Cost of the vaccine Parental resistance Lack of trust in healthcare providers Negative media reports	0	1	1	1	1	0	0	1	1	Positive clinical trial results Endorsement by health authorities Cost effectiveness Government support and subsidies Trust in healthcare providers Positive media coverage	1	1	1	0	0	1	0	1	1	399245558	fe6c24e0-6146-4529-8457-0f48be677aeb	2024-10-24 22:26:09
2024-10-24 15:26:04	2024-10-24 15:29:59	Female	21-30 years	Single	Bachelor's degree	Christianity	Others	1-5 years	No		Agree	Disagree		Agree	Agree	Agree	Agree	Agree	Agree	Agree	Agree	Agree	Agree	Agree	Lack of sufficient information about the vaccine Concerns about safety Concerns about effectively Cost of the vaccine Parental resistance Limited availability of the vaccine Lack of trust in healthcare providers Negative media reports	1	1	1	1	1	0	1	1	1	Positive clinical trial results Cost effectiveness Health education and awareness campaigns Government support and subsidies Availability in local health facilities Trust in healthcare providers Positive media coverage	1	0	1	0	1	1	1	1	1	399246000	d305a76b-a9bb-4571-b59d-fe466da3b540	2024-10-24 22:29:59
2024-10-24 15:29:59	2024-10-24 15:33:09	Male	21-30 years	Single	Bachelor's degree	Christianity	Pediatric doctor	Less than 1 year	No	Agree	Agree	Agree	Agree	Agree	Agree	Agree	Agree	Agree	Agree	Agree	Agree	Agree	Agree	Agree	Lack of sufficient information about the vaccine Concerns about safety Concerns about effectively Cost of the vaccine Limited availability of the vaccine Negative media reports	1	1	1	1	0	0	1	0	1	Positive clinical trial results Endorsement by health authorities Cost effectiveness Health education and awareness campaigns Government support and subsidies Availability in local health facilities Positive media coverage	1	1	1	0	1	1	1	0	1	399246379	85572c08-ecd1-4b6f-96d0-367e929e2fcf	2024-10-24 22:33:10
2024-10-24 15:33:09	2024-10-24 15:39:52	Female	21-30 years	Single	Bachelor's degree	Christianity	Others	Less than 1 year	No	Agree	Disagree	Agree	Agree	Agree	Agree	Agree	Agree	Agree	Agree	Agree	Agree	Agree	Agree	Agree	Lack of sufficient information about the vaccine Concerns about safety Cost of the vaccine Parental resistance Cultural beliefs and practices Limited availability of the vaccine	1	1	0	1	1	1	1	0	0	Positive clinical trial results Endorsement by health authorities Cost effectiveness Health education and awareness campaigns Government support and subsidies Availability in local health facilities Trust in healthcare providers Positive media coverage	1	1	1	0	1	1	1	1	1	399247184	c3c30b96-79a7-4515-9017-c1e008677adb	2024-10-24 22:39:54
2024-10-24 15:39:52	2024-10-24 15:45:53	Male	21-30 years	Single	Bachelor's degree	Christianity	Others	Less than 1 year	No	Agree	Agree	Agree	Agree	Agree	Agree	Agree	Agree	Agree	Agree	Agree	Agree	Agree	Agree	Agree	Lack of sufficient information about the vaccine Concerns about safety Concerns about effectively Cost of the vaccine	1	1	1	1	0	0	0	0	0	Positive clinical trial results Cost effectiveness Health education and awareness campaigns Government support and subsidies Availability in local health facilities Trust in healthcare providers Positive media coverage	1	0	1	0	1	1	1	1	1	399247830	95aae9ea-045c-4eb5-902f-8c4c606b75f1	2024-10-24 22:45:54
2024-10-24 15:45:54	2024-10-24 15:48:28	Male	21-30 years	Single	Bachelor's degree	Christianity	Pediatric doctor	Less than 1 year	No	Agree	Agree	Agree	Agree	Agree	Agree	Agree	Agree	Agree	Agree	Agree	Agree	Agree	Agree	Agree	Lack of sufficient information about the vaccine Concerns about safety Concerns about effectively Cost of the vaccine Parental resistance Cultural beliefs and practices Lack of trust in healthcare providers Negative media reports	1	1	1	1	1	1	0	1	1	Positive clinical trial results Endorsement by health authorities Cost effectiveness High demand from parents Health education and awareness campaigns Government support and subsidies Availability in local health facilities Trust in healthcare providers Positive media coverage	1	1	1	1	1	1	1	1	1	399248027	9d08b3ff-a84f-40d3-b317-391db3ea64c5	2024-10-24 22:48:30
2024-10-24 15:48:28	2024-10-24 15:52:40	Female	21-30 years	Single	Bachelor's degree	Christianity	Pediatric doctor	Less than 1 year	No	Agree	Strongly agree	Disagree	Agree	Disagree	Agree	Agree	Agree	Agree	Agree	Agree	Disagree	Agree	Agree	Agree	Lack of sufficient information about the vaccine Concerns about safety Concerns about effectively Cost of the vaccine Parental resistance Cultural beliefs and practices Limited availability of the vaccine	1	1	1	1	1	1	1	0	0	Positive clinical trial results Endorsement by health authorities Cost effectiveness Government support and subsidies Availability in local health facilities Positive media coverage	1	1	1	0	0	1	1	0	1	399248468	c23f8b90-2fac-4146-ba6b-350286050436	2024-10-24 22:52:40
2024-10-24 15:52:40	2024-10-24 15:56:19	Female	Less than 20 years	Single	National Diploma	Christianity	Public Health practitioner	Less than 1 year	No	Agree	Agree	Agree	Agree	Agree	Agree	Agree	Agree	Agree	Agree	Agree	Agree	Agree	Agree	Agree	Concerns about safety	0	1	0	0	0	0	0	0	0	Availability in local health facilities	0	0	0	0	0	0	1	0	0	399248896	6d6b5414-fb5f-4116-9648-59c40229eb0b	2024-10-24 22:56:22
2024-10-24 15:56:19	2024-10-24 15:58:54	Female	21-30 years	Single	National Diploma	Christianity	Nurse	Less than 1 year	No	Disagree	Strongly agree	Disagree	Agree	Agree	Agree	Agree	Agree	Agree	Agree	Agree	Agree	Agree	Agree	Strongly agree	Lack of sufficient information about the vaccine Concerns about safety Concerns about effectively Cost of the vaccine Parental resistance Cultural beliefs and practices Limited availability of the vaccine Lack of trust in healthcare providers Negative media reports	1	1	1	1	1	1	1	1	1	Positive clinical trial results Endorsement by health authorities Cost effectiveness High demand from parents Health education and awareness campaigns Government support and subsidies Availability in local health facilities Trust in healthcare providers Positive media coverage	1	1	1	1	1	1	1	1	1	399249185	75a808df-a190-493b-9647-a9adab4e9843	2024-10-24 22:58:55
2024-10-24 15:58:54	2024-10-24 16:01:50	Female	Less than 20 years	Single	National Diploma	Christianity	Nurse	Less than 1 year	No	Agree	Agree	Agree	Agree	Agree	Agree	Agree	Agree	Agree	Agree	Agree	Agree	Agree	Agree	Agree	Concerns about effectively Parental resistance Negative media reports	0	0	1	0	1	0	0	0	1	Positive clinical trial results Endorsement by health authorities High demand from parents Government support and subsidies	1	1	0	1	0	1	0	0	0	399249517	5fa11200-953f-47de-b54b-6d23e7be0e88	2024-10-24 23:01:51
2024-10-24 16:01:51	2024-10-24 16:04:44	Female	Less than 20 years	Single	Bachelor's degree	Christianity	Nurse practitioner	Less than 1 year	No	Agree	Strongly agree		Strongly agree	Strongly agree	Strongly agree	Strongly agree	Strongly agree	Strongly agree	Agree	Agree	Agree	Agree	Agree	Strongly agree	Cost of the vaccine Parental resistance Cultural beliefs and practices Limited availability of the vaccine	0	0	0	1	1	1	1	0	0	Positive clinical trial results Cost effectiveness Health education and awareness campaigns Availability in local health facilities Positive media coverage	1	0	1	0	1	0	1	0	1	399249851	65722343-cfa9-4151-b8ab-01dff3892655	2024-10-24 23:04:48
2024-10-24 16:04:44	2024-10-24 16:07:53	Female		Single		Christianity	Nurse	Less than 1 year	No	Disagree	Agree	Agree	Agree	Disagree	Disagree	Disagree	Disagree	Strongly disagree		Disagree	Disagree	Agree	Disagree	Agree	Lack of sufficient information about the vaccine Concerns about safety Concerns about effectively Limited availability of the vaccine Negative media reports	1	1	1	0	0	0	1	0	1	Positive clinical trial results Endorsement by health authorities Health education and awareness campaigns Government support and subsidies Availability in local health facilities Positive media coverage	1	1	0	0	1	1	1	0	1	399250275	cb8a20be-3373-492c-9a1f-31fe2849df66	2024-10-24 23:07:54
2024-10-24 16:07:53	2024-10-24 16:09:59	Female	21-30 years	Single	National Diploma	Christianity	Others	1-5 years	Yes	Agree	Agree	Agree	Disagree	Agree	Agree	Agree	Agree	Agree	Agree	Agree	Agree	Agree	Agree	Agree	Lack of sufficient information about the vaccine	1	0	0	0	0	0	0	0	0	Availability in local health facilities	0	0	0	0	0	0	1	0	0	399250530	92ac2e61-a20b-4aad-a644-729265a3b747	2024-10-24 23:10:00
2024-10-24 16:09:59	2024-10-24 16:12:45	Female	21-30 years	Single	National Diploma	Christianity	Laboratory technician	1-5 years	Yes		Agree	Disagree	Agree	Agree	Agree	Agree	Agree	Agree	Agree	Agree	Agree	Agree	Agree	Agree	Parental resistance	0	0	0	0	1	0	0	0	0	High demand from parents	0	0	0	1	0	0	0	0	0	399250803	22763533-0ec7-4e7f-a5fc-2bdd81203824	2024-10-24 23:12:50
2024-10-24 16:12:46	2024-10-24 16:14:35	Female	21-30 years	Single		Christianity	Laboratory technician	1-5 years	No	Agree	Disagree	Agree	Disagree		Agree	Agree	Agree	Agree	Agree	Agree															Trust in healthcare providers	0	0	0	0	0	0	0	1	0	399250948	e959fe73-7326-46da-a94d-abab1b7fb6e9	2024-10-24 23:14:36
2024-10-24 16:14:35	2024-10-24 16:16:20	Female	Less than 20 years	Single		Christianity	Laboratory technician	Less than 1 year	No	Agree	Agree	Agree	Agree	Agree	Agree	Agree	Agree	Agree	Agree						Concerns about safety	0	1	0	0	0	0	0	0	0	High demand from parents	0	0	0	1	0	0	0	0	0	399251140	0246f394-b291-4870-8264-4bbb3e286672	2024-10-24 23:16:24
2024-10-24 16:16:20	2024-10-24 16:18:50	Female	Less than 20 years	Single	Master's degree	Christianity	Laboratory technician	Less than 1 year	No	Agree	Agree	Agree	Agree	Strongly agree	Agree	Agree	Agree	Agree	Agree	Agree	Agree	Agree	Agree	Agree	Concerns about safety	0	1	0	0	0	0	0	0	0	High demand from parents	0	0	0	1	0	0	0	0	0	399251285	e8b5be45-7275-4a46-a08d-66ab73361619	2024-10-24 23:18:51
2024-10-24 16:18:50	2024-10-24 16:20:51	Male	21-30 years	Single	National Diploma	Christianity	Laboratory technician	Less than 1 year	No	Agree	Agree	Agree	Strongly agree	Strongly agree	Agree	Agree	Agree	Agree	Agree	Agree		Agree	Agree	Agree	Limited availability of the vaccine Lack of trust in healthcare providers Negative media reports	0	0	0	0	0	0	1	1	1	High demand from parents Government support and subsidies Availability in local health facilities	0	0	0	1	0	1	1	0	0	399251486	b4a67720-62b9-48a4-8973-59f6cee9791e	2024-10-24 23:20:53
2024-10-24 16:20:51	2024-10-24 16:22:57	Female	21-30 years	Single	National Diploma	Christianity	Laboratory technician	1-5 years	Yes	Strongly disagree	Disagree	Agree	Disagree	Agree	Agree	Agree	Agree	Agree	Agree	Agree	Agree	Disagree	Agree	Agree	Concerns about safety	0	1	0	0	0	0	0	0	0	Trust in healthcare providers	0	0	0	0	0	0	0	1	0	399251603	320c1987-fd52-4975-81de-e9c6f4fb6b74	2024-10-24 23:22:59
2024-10-24 16:22:57	2024-10-24 16:25:31		31-40 years	Single	Bachelor's degree	Christianity	Nurse	6-10 years	No	Disagree	Strongly agree	Disagree	Disagree	Disagree	Disagree	Disagree	Disagree	Disagree	Disagree	Disagree	Disagree	Disagree	Disagree	Disagree	Lack of sufficient information about the vaccine	1	0	0	0	0	0	0	0	0	Health education and awareness campaigns	0	0	0	0	1	0	0	0	0	399251938	6bec1a7c-f1df-44be-bfbe-a2dc37c75bbf	2024-10-24 23:25:32
2024-10-24 16:25:31	2024-10-24 16:27:54	Female	Less than 20 years	Single	National Diploma	Christianity	Nurse	Less than 1 year	Yes	Agree	Disagree	Agree	Agree	Agree	Agree	Agree	Agree	Agree	Agree	Agree	Agree	Agree	Agree	Agree	Lack of sufficient information about the vaccine Concerns about effectively Cost of the vaccine Parental resistance Cultural beliefs and practices Limited availability of the vaccine Negative media reports	1	0	1	1	1	1	1	0	1	Positive clinical trial results Endorsement by health authorities Cost effectiveness Government support and subsidies Availability in local health facilities Trust in healthcare providers Positive media coverage	1	1	1	0	0	1	1	1	1	399252126	6c4adb44-bb69-42bf-a2f7-78bc21293d28	2024-10-24 23:27:55
2024-10-24 16:27:55	2024-10-24 16:30:19	Female	Less than 20 years	Single	Doctoral degree	Christianity	Nurse	1-5 years	No	Agree	Disagree	Agree	Agree	Agree	Agree	Agree	Agree	Agree	Agree	Agree	Agree	Agree	Agree	Agree	Lack of sufficient information about the vaccine Concerns about safety Concerns about effectively Cost of the vaccine Parental resistance Cultural beliefs and practices Limited availability of the vaccine Lack of trust in healthcare providers Negative media reports	1	1	1	1	1	1	1	1	1	Positive clinical trial results Endorsement by health authorities Cost effectiveness Government support and subsidies Availability in local health facilities Trust in healthcare providers Positive media coverage	1	1	1	0	0	1	1	1	1	399252543	b7402817-6d09-488e-b609-7fda793a6880	2024-10-24 23:30:21
2024-10-25 07:26:57	2024-10-25 07:29:59	Female	21-30 years	Single		Christianity	Nurse	Less than 1 year	Yes	Agree	Agree	Agree	Agree	Strongly disagree	Agree	Agree	Agree	Agree	Agree	Agree	Agree	Agree	Agree	Agree	Lack of sufficient information about the vaccine Cost of the vaccine Limited availability of the vaccine Lack of trust in healthcare providers Negative media reports	1	0	0	1	0	0	1	1	1	Positive clinical trial results Government support and subsidies Availability in local health facilities Trust in healthcare providers Positive media coverage	1	0	0	0	0	1	1	1	1	399487762	d1fc38b3-1e38-40c2-b75f-a722e711f2c3	2024-10-25 14:30:00
2024-10-25 07:29:59	2024-10-25 07:33:02	Female	31-40 years	Married		Christianity	Others	6-10 years	Yes	Agree	Agree	Agree	Agree	Strongly agree	Strongly agree	Strongly agree	Strongly agree	Strongly agree	Strongly agree	Strongly agree	Strongly agree	Strongly agree	Strongly agree	Strongly agree	Lack of sufficient information about the vaccine Concerns about safety Cost of the vaccine Parental resistance Cultural beliefs and practices Limited availability of the vaccine Lack of trust in healthcare providers Negative media reports	1	1	0	1	1	1	1	1	1	Positive clinical trial results Endorsement by health authorities Cost effectiveness High demand from parents Health education and awareness campaigns Government support and subsidies Availability in local health facilities Trust in healthcare providers Positive media coverage	1	1	1	1	1	1	1	1	1	399488867	54653fb7-2878-4203-ad6a-2f994a3d6f81	2024-10-25 14:33:03
2024-10-25 07:33:02	2024-10-25 07:35:18	Male	21-30 years	Single	Bachelor's degree	Christianity	Others	Less than 1 year	Yes	Agree	Agree	Agree	Agree	Agree	Agree	Agree	Agree	Agree	Agree	Agree	Agree	Agree	Agree		Lack of sufficient information about the vaccine Concerns about safety Concerns about effectively Cost of the vaccine	1	1	1	1	0	0	0	0	0	Positive clinical trial results Cost effectiveness Government support and subsidies Trust in healthcare providers Positive media coverage	1	0	1	0	0	1	0	1	1	399489814	0cdfbce7-2dcf-4028-bd4b-cfe56c96fe41	2024-10-25 14:35:18
2024-10-25 07:35:18	2024-10-25 07:37:21	Female	Less than 20 years	Single		Christianity	Nurse	Less than 1 year	No	Agree	Agree	Agree	Agree	Agree	Agree	Agree	Agree	Agree	Agree	Agree	Agree	Agree	Agree	Agree	Lack of sufficient information about the vaccine	1	0	0	0	0	0	0	0	0	Positive clinical trial results	1	0	0	0	0	0	0	0	0	399490465	ca8bbbc9-1911-4fda-8a22-e05aa45b2260	2024-10-25 14:37:22
2024-10-25 07:37:21	2024-10-25 07:39:08	Female	Less than 20 years	Single	National Diploma	Christianity	Others	Less than 1 year	Yes	Agree	Strongly agree	Agree	Agree	Agree	Agree	Agree	Agree	Agree	Agree	Agree	Agree	Agree	Agree	Agree	Lack of sufficient information about the vaccine	1	0	0	0	0	0	0	0	0	Positive clinical trial results	1	0	0	0	0	0	0	0	0	399491315	6bcabbee-a04a-47e1-a825-1230159624f6	2024-10-25 14:39:13
2024-10-25 07:39:08	2024-10-25 07:41:06		Less than 20 years	Single	National Diploma	Christianity	Nurse	Less than 1 year	Yes	Agree	Agree	Strongly agree	Strongly agree	Strongly agree	Agree	Agree	Agree	Agree	Agree	Agree	Agree	Agree	Agree	Agree	Concerns about safety	0	1	0	0	0	0	0	0	0	Health education and awareness campaigns	0	0	0	0	1	0	0	0	0	399492102	9b6d7b52-1c9d-4c50-a173-256a7d433abe	2024-10-25 14:41:07
2024-10-25 07:41:06	2024-10-25 07:42:53	Female	Less than 20 years	Single		Christianity	Others		No	Disagree	Strongly disagree	Agree	Strongly disagree	Strongly agree	Strongly disagree	Disagree	Disagree	Disagree	Disagree																										399492701	32005d6d-5cb3-4cf1-9729-4b0942adb231	2024-10-25 14:42:54
2024-10-25 07:42:53	2024-10-25 07:44:40	Female	21-30 years	Single	Bachelor's degree	Christianity	Others		Yes	Agree	Agree		Agree		Agree	Agree		Agree	Agree	Agree		Agree	Agree	Agree	Lack of sufficient information about the vaccine Concerns about safety Concerns about effectively Parental resistance	1	1	1	0	1	0	0	0	0	Positive clinical trial results Endorsement by health authorities Government support and subsidies	1	1	0	0	0	1	0	0	0	399493401	ae8b0d6b-0f09-4ab3-bb68-b5f317ab05af	2024-10-25 14:44:41
2024-10-25 07:44:40	2024-10-25 07:46:37	Female	21-30 years	Single	Bachelor's degree	Christianity	Others		Yes	Agree	Agree		Agree		Agree	Agree		Agree	Agree	Agree	Agree	Agree	Agree	Agree	Lack of sufficient information about the vaccine Concerns about safety Concerns about effectively Cost of the vaccine Parental resistance	1	1	1	1	1	0	0	0	0	Positive clinical trial results Endorsement by health authorities Government support and subsidies	1	1	0	0	0	1	0	0	0	399494661	787516d7-3fcb-43af-9edf-3b190714f08e	2024-10-25 14:46:39
2024-10-25 07:46:37	2024-10-25 07:50:08	Female	21-30 years	Single	Bachelor's degree	Christianity	Others		Yes	Agree	Agree	Agree	Agree	Agree	Agree	Agree	Agree	Agree	Agree	Agree	Agree	Agree	Agree	Agree	Lack of sufficient information about the vaccine Concerns about safety Concerns about effectively Parental resistance	1	1	1	0	1	0	0	0	0	Positive clinical trial results Endorsement by health authorities Cost effectiveness High demand from parents Health education and awareness campaigns Government support and subsidies Positive media coverage	1	1	1	1	1	1	0	0	1	399496283	8ac579b9-8fad-4088-bd0a-58ccefed087b	2024-10-25 14:50:10
2024-10-25 07:50:09	2024-10-25 07:52:12	Female	21-30 years	Married		Christianity	Others	Less than 1 year	No	Disagree	Agree	Agree	Agree	Agree	Agree	Agree	Agree	Agree	Agree	Agree	Agree	Agree	Agree	Agree	Lack of sufficient information about the vaccine Concerns about safety Cost of the vaccine Parental resistance	1	1	0	1	1	0	0	0	0	Positive clinical trial results Endorsement by health authorities Health education and awareness campaigns Availability in local health facilities Trust in healthcare providers Positive media coverage	1	1	0	0	1	0	1	1	1	399497115	a0e604bb-453d-4567-8d34-e0e8b07c4f17	2024-10-25 14:52:14
2024-10-25 07:52:12	2024-10-25 07:54:14	Female	Less than 20 years	Single	Bachelor's degree	Christianity	Others			Agree	Agree	Agree	Agree	Agree	Disagree	Disagree	Agree	Disagree	Disagree	Strongly disagree	Agree	Agree	Disagree	Strongly disagree	Cost of the vaccine	0	0	0	1	0	0	0	0	0	Cost effectiveness	0	0	1	0	0	0	0	0	0	399497958	b09a3929-0f8b-4119-b630-2d33dff7453e	2024-10-25 14:54:15
2024-10-25 07:54:14	2024-10-25 07:57:26	Female	31-40 years	Single	Bachelor's degree	Christianity	Pediatric doctor	6-10 years	Yes	Agree	Strongly agree	Agree	Agree	Agree	Agree	Agree	Disagree	Disagree	Agree	Agree	Agree	Agree	Agree	Agree	Lack of sufficient information about the vaccine Concerns about safety Concerns about effectively Cost of the vaccine Parental resistance Cultural beliefs and practices Limited availability of the vaccine Negative media reports	1	1	1	1	1	1	1	0	1	Positive clinical trial results Endorsement by health authorities Cost effectiveness High demand from parents Health education and awareness campaigns Government support and subsidies Availability in local health facilities Trust in healthcare providers Positive media coverage	1	1	1	1	1	1	1	1	1	399499214	9b5ab268-d90f-4220-b39d-8e6e7360e9bc	2024-10-25 14:57:29
2024-10-25 07:57:27	2024-10-25 07:59:14	Female	Less than 20 years	Single	Bachelor's degree	Christianity	Nurse	Less than 1 year	No	Agree	Agree	Agree	Agree	Agree	Agree	Agree	Agree	Agree	Agree	Agree	Agree	Agree	Agree	Agree	Concerns about safety	0	1	0	0	0	0	0	0	0											399499944	9309ce0e-e433-4765-953c-fc2143cc0beb	2024-10-25 14:59:15
2024-10-25 07:59:14	2024-10-25 08:01:14	Female	21-30 years	Married	Bachelor's degree	Christianity	Pharmacist	Less than 1 year	No	Agree	Strongly agree	Disagree	Agree	Agree	Agree	Agree	Agree	Agree	Agree	Agree	Agree	Agree	Agree	Agree	Lack of sufficient information about the vaccine Concerns about safety Cost of the vaccine Cultural beliefs and practices Negative media reports	1	1	0	1	0	1	0	0	1	Positive clinical trial results Endorsement by health authorities Cost effectiveness Health education and awareness campaigns Government support and subsidies Trust in healthcare providers Positive media coverage	1	1	1	0	1	1	0	1	1	399500951	c73c3a03-dbad-47d2-8b63-c77deb5d12a7	2024-10-25 15:01:15
2024-10-25 08:01:14	2024-10-25 08:03:36	Female	21-30 years	Married	Bachelor's degree	Christianity	Pharmacist	Less than 1 year	Yes	Agree	Strongly agree	Strongly agree	Strongly agree	Agree	Agree	Strongly agree	Agree	Agree	Strongly agree	Agree	Agree	Strongly agree	Agree	Strongly agree	Cost of the vaccine Limited availability of the vaccine	0	0	0	1	0	0	1	0	0	Cost effectiveness Health education and awareness campaigns Government support and subsidies Availability in local health facilities Positive media coverage	0	0	1	0	1	1	1	0	1	399502116	86a55e23-9646-4954-b654-67f45d07260d	2024-10-25 15:03:36
2024-10-25 08:03:36	2024-10-25 08:05:55	Male	21-30 years	Single	Bachelor's degree	Christianity	Pharmacist	Less than 1 year	Yes	Agree	Disagree	Agree	Agree	Agree	Strongly agree	Agree	Agree	Agree	Agree	Agree	Agree	Agree	Agree	Agree	Cost of the vaccine Parental resistance Limited availability of the vaccine Negative media reports	0	0	0	1	1	0	1	0	1	Positive clinical trial results Endorsement by health authorities Cost effectiveness Health education and awareness campaigns Availability in local health facilities Trust in healthcare providers Positive media coverage	1	1	1	0	1	0	1	1	1	399503081	f9b1db95-fef1-4240-af06-380dca6a026c	2024-10-25 15:05:56
2024-10-25 08:05:55	2024-10-25 08:08:31	Female	21-30 years	Single		Christianity			Yes	Agree	Strongly agree	Agree	Agree	Agree	Agree	Agree	Agree	Agree	Agree	Disagree	Disagree	Disagree	Disagree	Agree	Lack of sufficient information about the vaccine Concerns about safety Concerns about effectively Cost of the vaccine Cultural beliefs and practices Limited availability of the vaccine Negative media reports	1	1	1	1	0	1	1	0	1	Positive clinical trial results Endorsement by health authorities Cost effectiveness Health education and awareness campaigns Government support and subsidies Availability in local health facilities Positive media coverage	1	1	1	0	1	1	1	0	1	399504152	f2d73b4e-0b4a-4564-967d-46d19bc6eaea	2024-10-25 15:08:32
2024-10-25 08:08:32	2024-10-25 08:11:27	Female	21-30 years	Single	Bachelor's degree	Christianity	Others	Less than 1 year	No	Agree	Agree	Disagree	Agree	Disagree	Agree	Agree		Agree	Agree	Disagree	Agree	Agree	Agree	Agree	Lack of sufficient information about the vaccine Concerns about safety Concerns about effectively Cost of the vaccine Parental resistance Limited availability of the vaccine Lack of trust in healthcare providers Negative media reports	1	1	1	1	1	0	1	1	1	Positive clinical trial results Endorsement by health authorities Cost effectiveness Health education and awareness campaigns Government support and subsidies Availability in local health facilities Trust in healthcare providers Positive media coverage	1	1	1	0	1	1	1	1	1	399505294	c5c8d4d2-cbb6-4acc-be26-541d777f8fff	2024-10-25 15:11:28
2024-10-25 08:11:27	2024-10-25 08:13:28	Male	21-30 years	Single	Bachelor's degree	Christianity	Others	Less than 1 year	No	Agree	Agree	Agree	Agree	Agree	Agree	Agree	Agree	Agree	Agree	Agree	Disagree	Agree	Agree	Agree	Lack of sufficient information about the vaccine Concerns about safety Concerns about effectively Parental resistance Cultural beliefs and practices Limited availability of the vaccine Lack of trust in healthcare providers Negative media reports	1	1	1	0	1	1	1	1	1	Positive clinical trial results Endorsement by health authorities High demand from parents Health education and awareness campaigns Government support and subsidies Availability in local health facilities Trust in healthcare providers Positive media coverage	1	1	0	1	1	1	1	1	1	399506046	6987b3ef-cc00-494b-9b2b-02f11d3e2906	2024-10-25 15:13:30
2024-10-25 08:13:28	2024-10-25 08:16:18	Female	21-30 years	Single	Bachelor's degree	Christianity	Others		No	Agree	Agree	Agree	Agree	Agree	Agree	Agree	Agree	Agree	Agree	Agree		Agree	Agree		Lack of sufficient information about the vaccine Cost of the vaccine Parental resistance Cultural beliefs and practices Limited availability of the vaccine Negative media reports	1	0	0	1	1	1	1	0	1	Positive clinical trial results Endorsement by health authorities Cost effectiveness Health education and awareness campaigns Government support and subsidies Availability in local health facilities Trust in healthcare providers Positive media coverage	1	1	1	0	1	1	1	1	1	399507053	6376c571-56c4-4445-a526-d3332cbf4bfb	2024-10-25 15:16:19
2024-10-25 08:16:18	2024-10-25 08:19:04	Female	21-30 years	Single	National Diploma	Christianity	Others	1-5 years	Yes	Agree	Agree	Agree	Agree	Agree	Strongly agree	Strongly agree	Strongly agree	Strongly agree	Strongly agree	Agree	Strongly agree	Agree	Strongly agree	Strongly agree	Lack of sufficient information about the vaccine Concerns about safety Concerns about effectively Cost of the vaccine Parental resistance Limited availability of the vaccine Lack of trust in healthcare providers Negative media reports	1	1	1	1	1	0	1	1	1	Positive clinical trial results Endorsement by health authorities Cost effectiveness High demand from parents Health education and awareness campaigns Government support and subsidies Availability in local health facilities Trust in healthcare providers Positive media coverage	1	1	1	1	1	1	1	1	1	399508109	fd3748f1-3479-4238-b005-37d49c44d0bf	2024-10-25 15:19:05
2024-10-25 08:19:05	2024-10-25 08:23:07	Female	21-30 years	Single		Christianity	Others	Less than 1 year	No	Disagree	Strongly disagree	Disagree	Disagree		Disagree	Disagree	Disagree	Disagree	Agree	Disagree			Disagree	Agree	Lack of sufficient information about the vaccine Concerns about safety Cultural beliefs and practices	1	1	0	0	0	1	0	0	0	Positive clinical trial results Health education and awareness campaigns Trust in healthcare providers	1	0	0	0	1	0	0	1	0	399509757	220a8352-9685-49cb-bc90-742b6ee98b28	2024-10-25 15:23:09
2024-10-25 08:23:07	2024-10-25 08:25:21	Female	Less than 20 years	Single		Christianity	Others	Less than 1 year	No	Agree	Agree	Agree	Agree	Agree	Agree	Agree	Agree	Agree	Agree	Agree	Agree	Agree	Agree	Agree	Lack of sufficient information about the vaccine Concerns about safety Concerns about effectively Cost of the vaccine Parental resistance Cultural beliefs and practices Limited availability of the vaccine Lack of trust in healthcare providers Negative media reports	1	1	1	1	1	1	1	1	1	Positive clinical trial results Endorsement by health authorities Cost effectiveness High demand from parents Health education and awareness campaigns Government support and subsidies Availability in local health facilities Trust in healthcare providers Positive media coverage	1	1	1	1	1	1	1	1	1	399510616	487caecf-be54-42b1-a3a5-c5df6bb1f440	2024-10-25 15:25:26
2024-10-25 08:25:21	2024-10-25 08:27:59	Female	21-30 years	Single	Bachelor's degree	Christianity	Pediatric doctor	Less than 1 year	No	Agree	Agree	Agree	Disagree	Disagree	Agree	Agree	Agree	Strongly agree	Disagree	Disagree	Agree	Agree	Disagree	Disagree	Concerns about effectively	0	0	1	0	0	0	0	0	0	High demand from parents	0	0	0	1	0	0	0	0	0	399511450	02bcd378-a291-4b90-8897-7eaaca3df154	2024-10-25 15:28:00
2024-10-25 08:27:59	2024-10-25 08:31:54	Female	Less than 20 years	Single		Christianity	Nurse	Less than 1 year	No	Disagree	Disagree	Disagree	Disagree	Agree	Agree	Disagree	Disagree	Disagree	Agree	Disagree	Disagree	Disagree	Disagree	Agree	Lack of sufficient information about the vaccine	1	0	0	0	0	0	0	0	0	Endorsement by health authorities	0	1	0	0	0	0	0	0	0	399512806	1bc75278-80e0-4ad9-baf7-5a37ec25ef12	2024-10-25 15:31:55
2024-10-25 08:31:54	2024-10-25 08:33:45	Female	Less than 20 years	Single		Christianity	Others	1-5 years	No	Agree	Agree		Agree	Agree	Agree	Agree		Agree	Agree	Agree		Agree	Agree	Agree	Cost of the vaccine	0	0	0	1	0	0	0	0	0	Positive clinical trial results	1	0	0	0	0	0	0	0	0	399513429	734078fe-c9a2-4d74-9732-e45b32f418b8	2024-10-25 15:33:46
2024-10-25 08:33:45	2024-10-25 08:35:32	Female	Less than 20 years	Single	National Diploma	Christianity	Laboratory technician		No	Disagree	Agree	Agree	Agree	Agree	Agree	Disagree	Agree	Agree	Agree	Disagree	Disagree	Agree	Disagree	Disagree	Lack of sufficient information about the vaccine	1	0	0	0	0	0	0	0	0	Positive media coverage	0	0	0	0	0	0	0	0	1	399514051	7f664d1e-b1f2-44ab-8f88-3ae799700729	2024-10-25 15:35:34
2024-10-25 08:35:32	2024-10-25 08:37:50	Female	Less than 20 years	Single	Bachelor's degree	Christianity	Others		No	Disagree	Agree	Agree		Agree		Agree	Agree	Disagree	Disagree	Agree	Agree	Agree	Disagree	Agree	Cultural beliefs and practices Limited availability of the vaccine Lack of trust in healthcare providers Negative media reports	0	0	0	0	0	1	1	1	1	Positive clinical trial results Health education and awareness campaigns Government support and subsidies Availability in local health facilities	1	0	0	0	1	1	1	0	0	399514802	a4d35a56-c9f9-479f-9af9-9d1505ac6619	2024-10-25 15:37:51
2024-10-25 08:37:50	2024-10-25 08:41:01	Female	21-30 years	Single	Bachelor's degree	Christianity	Others		No	Disagree	Agree	Agree	Agree	Agree	Disagree	Agree	Agree	Agree	Agree	Strongly disagree	Disagree	Disagree	Strongly disagree	Agree	Lack of sufficient information about the vaccine Concerns about safety Cost of the vaccine Parental resistance Negative media reports	1	1	0	1	1	0	0	0	1	Positive clinical trial results Endorsement by health authorities Cost effectiveness High demand from parents Health education and awareness campaigns Positive media coverage	1	1	1	1	1	0	0	0	1	399516127	de58f4ec-6adc-4aa8-8f05-1d82809fabe5	2024-10-25 15:41:01
2024-10-25 08:41:01	2024-10-25 08:43:24	Female	21-30 years	Single	National Diploma	Christianity	Laboratory technician	1-5 years	Yes	Agree	Agree	Agree	Agree	Agree	Agree	Agree	Agree	Agree	Agree	Agree	Agree	Agree	Agree	Agree	Cultural beliefs and practices	0	0	0	0	0	1	0	0	0	Endorsement by health authorities	0	1	0	0	0	0	0	0	0	399517227	f2ebca4f-50ec-4560-b0e4-5e50000400ae	2024-10-25 15:43:27
2024-10-25 08:43:25	2024-10-25 08:45:06	Female	21-30 years	Single	National Diploma	Christianity	Laboratory technician	1-5 years	Yes	Agree	Agree	Agree	Agree	Strongly agree	Agree	Strongly agree	Strongly agree	Strongly agree	Strongly agree	Agree	Agree	Agree		Agree	Cost of the vaccine	0	0	0	1	0	0	0	0	0	Health education and awareness campaigns	0	0	0	0	1	0	0	0	0	399517908	da7d7b11-a074-4463-b272-a2654ffc0f14	2024-10-25 15:45:08
2024-10-25 08:45:06	2024-10-25 08:51:59	Female	21-30 years	Single	National Diploma	Christianity	Laboratory technician	Less than 1 year	Yes	Strongly agree	Strongly agree	Strongly agree	Strongly agree	Strongly agree	Strongly agree	Strongly agree	Agree	Agree	Agree	Agree	Agree	Agree	Agree	Agree	Cost of the vaccine	0	0	0	1	0	0	0	0	0	Availability in local health facilities	0	0	0	0	0	0	1	0	0	399521011	3a4e54f4-a446-4952-9581-e667055ce2dc	2024-10-25 15:52:01
2024-10-25 08:51:59	2024-10-25 08:53:46	Male	21-30 years	Single	National Diploma	Christianity	Laboratory technician	1-5 years	Yes	Agree	Agree	Agree	Agree	Agree	Agree	Agree	Agree	Agree	Agree	Agree	Agree	Agree	Agree	Agree	Cultural beliefs and practices	0	0	0	0	0	1	0	0	0	Endorsement by health authorities	0	1	0	0	0	0	0	0	0	399521705	cdec33a0-a920-4de0-9267-daeaf51f5e2b	2024-10-25 15:53:47
2024-10-25 08:53:46	2024-10-25 08:56:02	Male	21-30 years	Married	Master's degree	Christianity	Public Health practitioner	1-5 years	Yes	Agree	Agree	Agree	Agree	Agree	Agree	Agree	Agree	Agree	Agree	Strongly agree	Agree	Agree	Agree	Agree	Lack of sufficient information about the vaccine Concerns about safety Parental resistance Cultural beliefs and practices Negative media reports	1	1	0	0	1	1	0	0	1	Positive clinical trial results Cost effectiveness Health education and awareness campaigns Availability in local health facilities Positive media coverage	1	0	1	0	1	0	1	0	1	399522608	21ce60d0-470a-4123-bbc4-fb27dd22f345	2024-10-25 15:56:05
2024-10-25 08:56:02	2024-10-25 08:59:12	Female	Less than 20 years	Single		Christianity	Others	Less than 1 year	No	Agree	Strongly agree		Agree	Strongly agree	Agree	Agree	Agree	Disagree	Agree	Agree	Agree	Agree	Disagree	Agree	Lack of sufficient information about the vaccine Concerns about safety Cost of the vaccine Cultural beliefs and practices	1	1	0	1	0	1	0	0	0	Cost effectiveness Health education and awareness campaigns Government support and subsidies Availability in local health facilities Positive media coverage	0	0	1	0	1	1	1	0	1	399524032	a5e9b981-75d2-41d6-9611-87850473842e	2024-10-25 15:59:12
2024-10-25 08:59:12	2024-10-25 09:01:28	Female	Less than 20 years	Single	Postdoctoral training	Christianity	Nurse	1-5 years	No	Disagree	Disagree	Disagree	Disagree	Disagree	Disagree	Disagree	Disagree	Disagree	Disagree	Disagree	Disagree	Disagree	Disagree	Disagree	Concerns about effectively	0	0	1	0	0	0	0	0	0	Government support and subsidies	0	0	0	0	0	1	0	0	0	399524993	17f8fcc4-9172-46db-937b-ee1ddca14bcb	2024-10-25 16:01:30
2024-10-25 17:04:18	2024-10-25 17:05:22	Female	21-30 years	Single	National Diploma	Christianity	Nurse	Less than 1 year	No	Agree	Agree	Agree	Agree	Agree	Agree	Agree	Agree	Agree	Agree	Agree	Agree	Agree	Agree	Agree	Lack of sufficient information about the vaccine	1	0	0	0	0	0	0	0	0	Endorsement by health authorities	0	1	0	0	0	0	0	0	0	399527030	1d16dcf7-3996-4a4f-83d2-5c7017a978c4	2024-10-25 16:05:30
2024-10-25 17:05:23	2024-10-25 17:06:54	Female		Single	National Diploma	Christianity	Nurse	1-5 years	No	Agree	Agree	Agree	Strongly disagree	Agree	Agree	Strongly agree	Agree	Disagree	Disagree	Strongly agree	Strongly agree	Strongly agree	Strongly agree	Strongly agree	Lack of sufficient information about the vaccine	1	0	0	0	0	0	0	0	0	Positive clinical trial results	1	0	0	0	0	0	0	0	0	399527812	02b5a647-7228-4be8-808d-5b2aea72ea9c	2024-10-25 16:06:58
2024-10-25 17:06:54	2024-10-25 17:08:11	Female	21-30 years	Single	Bachelor's degree	Christianity	Nurse	Less than 1 year	No	Disagree	Disagree	Disagree	Disagree	Disagree	Disagree	Disagree	Disagree	Disagree	Disagree	Disagree	Disagree	Disagree	Disagree	Disagree	Lack of sufficient information about the vaccine	1	0	0	0	0	0	0	0	0	High demand from parents	0	0	0	1	0	0	0	0	0	399528442	f5f2f776-fc4a-4c71-b52a-9ec477831cff	2024-10-25 16:08:15
2024-10-25 17:08:12	2024-10-25 17:09:45	Male	21-30 years	Single	Bachelor's degree	Christianity	Nurse practitioner	Less than 1 year	No	Agree	Agree	Strongly agree	Strongly agree	Agree	Agree	Agree	Agree	Agree	Strongly agree	Strongly agree	Strongly agree	Agree	Agree	Agree	Lack of sufficient information about the vaccine Cultural beliefs and practices Limited availability of the vaccine Negative media reports	1	0	0	0	0	1	1	0	1	Positive clinical trial results Endorsement by health authorities Health education and awareness campaigns Availability in local health facilities Trust in healthcare providers Positive media coverage	1	1	0	0	1	0	1	1	1	399529041	786f0b3a-07b0-46b1-b4bd-6d8580d52da7	2024-10-25 16:09:48
2024-10-25 17:09:46	2024-10-25 17:11:13	Female	21-30 years	Married	National Diploma	Christianity	Nurse	Less than 1 year	No	Disagree	Strongly agree	Agree	Agree	Disagree	Agree	Agree	Disagree	Agree	Agree	Disagree	Disagree	Disagree	Agree	Agree	Lack of sufficient information about the vaccine Concerns about safety Concerns about effectively Cost of the vaccine Cultural beliefs and practices	1	1	1	1	0	1	0	0	0	Positive clinical trial results Endorsement by health authorities Cost effectiveness Health education and awareness campaigns	1	1	1	0	1	0	0	0	0	399529675	3d2d4848-3831-48bb-b688-777ef44eab22	2024-10-25 16:11:16
2024-10-25 17:11:13	2024-10-25 17:12:49	Male	Less than 20 years	Single	Bachelor's degree	Christianity	Nurse	Less than 1 year	Yes	Agree	Agree	Agree	Agree	Agree	Agree	Agree	Agree	Agree	Agree	Agree	Agree	Agree	Agree	Agree	Lack of sufficient information about the vaccine Concerns about safety Concerns about effectively Cost of the vaccine Limited availability of the vaccine Lack of trust in healthcare providers Negative media reports	1	1	1	1	0	0	1	1	1	Positive clinical trial results Cost effectiveness Health education and awareness campaigns Availability in local health facilities Trust in healthcare providers Positive media coverage	1	0	1	0	1	0	1	1	1	399530256	6375877d-edc0-4cd5-9c30-dcc0db5dcbf2	2024-10-25 16:12:51
2024-10-25 17:12:49	2024-10-25 17:14:08	Male		Single	Bachelor's degree	Christianity	Laboratory technician	6-10 years	Yes	Strongly agree	Agree	Agree	Agree	Agree	Agree	Agree	Agree	Agree	Agree	Agree	Agree	Agree	Agree	Agree	Cultural beliefs and practices	0	0	0	0	0	1	0	0	0	Health education and awareness campaigns Positive media coverage	0	0	0	0	1	0	0	0	1	399530760	f2083d4b-8a68-4ace-946b-3b6f8afcff19	2024-10-25 16:14:11
2024-10-25 17:14:08	2024-10-25 17:15:26	Female	31-40 years	Married	Bachelor's degree		Pharmacist	11-15 years	Yes	Agree	Agree	Agree	Agree	Agree	Agree	Agree	Agree	Agree	Agree	Strongly disagree	Agree		Agree		Parental resistance	0	0	0	0	1	0	0	0	0	Positive media coverage	0	0	0	0	0	0	0	0	1	399531326	30a73677-6422-4344-aca3-9376e7a6b659	2024-10-25 16:15:31
2024-10-25 17:15:26	2024-10-25 17:17:30	Female	31-40 years	Married	Bachelor's degree	Christianity	Nurse practitioner	6-10 years	Yes	Strongly agree	Agree		Agree	Agree	Agree	Agree	Agree	Agree	Agree	Agree	Agree	Agree	Agree	Agree	Parental resistance	0	0	0	0	1	0	0	0	0	Health education and awareness campaigns	0	0	0	0	1	0	0	0	0	399532097	f4e6ef0e-10bf-4786-adeb-dc7baa610f47	2024-10-25 16:17:34
2024-10-25 17:17:30	2024-10-25 17:18:41	Female	21-30 years	Single	National Diploma	Christianity	Nurse	1-5 years	Yes	Strongly agree	Agree	Agree	Agree	Agree	Agree	Agree	Agree	Agree	Agree	Agree	Agree	Agree	Agree	Agree	Parental resistance	0	0	0	0	1	0	0	0	0	Health education and awareness campaigns Government support and subsidies	0	0	0	0	1	1	0	0	0	399532439	158cec62-4977-4106-b9bb-ca828a35c02e	2024-10-25 16:18:43
2024-10-25 17:18:41	2024-10-25 17:19:49	Male	41-50 years	Married	Master's degree	Christianity	Pharmacist	6-10 years	Yes	Strongly agree	Agree	Agree	Agree	Agree	Agree	Agree	Agree	Agree	Agree	Agree	Agree	Agree	Agree	Agree																					399532830	e6ac3952-546d-47cc-834c-4731b9354126	2024-10-25 16:19:52
2024-10-25 17:19:49	2024-10-25 17:21:19	Female	31-40 years	Single		Christianity	Nurse practitioner	1-5 years	Yes	Strongly agree	Strongly agree	Agree	Agree	Strongly agree	Strongly agree	Strongly disagree	Strongly agree	Agree	Strongly agree	Agree	Agree	Agree	Strongly disagree	Agree	Concerns about effectively	0	0	1	0	0	0	0	0	0	Government support and subsidies	0	0	0	0	0	1	0	0	0	399533373	73b244e2-9f11-4a9b-a6af-adb651b5b8de	2024-10-25 16:21:25
2024-10-25 17:21:19	2024-10-25 17:22:41	Male	31-40 years	Single	Bachelor's degree	Christianity	Pharmacist	11-15 years	Yes	Strongly agree	Agree	Agree		Agree		Agree	Agree	Agree	Agree						Parental resistance Cultural beliefs and practices	0	0	0	0	1	1	0	0	0	Health education and awareness campaigns Availability in local health facilities Trust in healthcare providers	0	0	0	0	1	0	1	1	0	399533968	0b303cfd-bbdf-4f74-b7a7-4f28e1d8ca21	2024-10-25 16:22:44
2024-10-25 10:12:59	2024-10-25 10:15:38	Female	21-30 years	Single	National Diploma	Christianity	Laboratory technician	1-5 years	No	Agree	Strongly agree	Agree	Disagree	Agree	Agree	Agree	Agree	Agree	Agree	Agree	Agree	Agree	Agree	Strongly agree	Concerns about safety	0	1	0	0	0	0	0	0	0	Availability in local health facilities	0	0	0	0	0	0	1	0	0	399555220	495f9b6f-94b8-4d65-b619-d9f1068ec722	2024-10-25 17:15:38
2024-10-25 10:15:38	2024-10-25 10:17:37	Female	Less than 20 years	Single	National Diploma	Christianity	Laboratory technician	Less than 1 year	No	Agree	Agree	Agree	Agree	Agree	Agree	Agree	Agree	Agree	Agree	Agree	Agree	Agree	Agree	Agree	Cost of the vaccine	0	0	0	1	0	0	0	0	0	Availability in local health facilities	0	0	0	0	0	0	1	0	0	399556050	0581dbb0-5118-4bf6-9851-60b4affde93f	2024-10-25 17:17:39
2024-10-25 10:17:37	2024-10-25 10:19:23	Female	21-30 years	Single	National Diploma	Christianity	Laboratory technician	1-5 years	No	Agree	Agree	Agree	Agree	Agree	Agree	Agree	Agree	Agree	Agree	Agree	Agree	Agree	Agree	Agree	Concerns about effectively	0	0	1	0	0	0	0	0	0	Trust in healthcare providers	0	0	0	0	0	0	0	1	0	399556560	da465704-eeed-4c9f-ada3-b8b121ce4b13	2024-10-25 17:19:24
2024-10-25 10:19:24	2024-10-25 10:21:34	Female	41-50 years	Married	National Diploma	Christianity	Public Health practitioner	6-10 years	Yes	Agree	Agree	Agree	Agree	Agree	Agree	Agree	Agree	Agree	Agree	Agree	Agree	Agree	Agree	Agree	Lack of sufficient information about the vaccine Concerns about safety Parental resistance Negative media reports	1	1	0	0	1	0	0	0	1	Positive clinical trial results Health education and awareness campaigns Government support and subsidies Positive media coverage	1	0	0	0	1	1	0	0	1	399557494	eb359a90-8472-495b-9ac6-22a3560341a2	2024-10-25 17:21:34
2024-10-25 10:21:34	2024-10-25 10:23:30	Female	Less than 20 years	Single	National Diploma	Christianity	Others	Less than 1 year	No	Agree	Agree	Agree	Disagree	Agree	Strongly agree	Agree	Agree	Strongly agree	Strongly agree	Agree	Agree	Disagree	Agree	Agree	Lack of sufficient information about the vaccine	1	0	0	0	0	0	0	0	0	Health education and awareness campaigns	0	0	0	0	1	0	0	0	0	399558072	7630f8b6-98c4-4288-86e9-6b270bc7f93d	2024-10-25 17:23:30
2024-10-25 10:23:30	2024-10-25 10:24:42		21-30 years	Single	Bachelor's degree	Christianity	Pharmacist	Less than 1 year	No																																				399558411	9608a92b-27f7-44d5-8c74-e1a04287dd28	2024-10-25 17:24:42
2024-10-25 10:24:42	2024-10-25 10:29:59	Male	31-40 years	Married	Bachelor's degree	Christianity	Pharmacist	1-5 years	No	Agree	Strongly agree	Agree	Agree	Strongly agree	Agree	Agree	Agree	Agree	Agree	Agree	Agree	Agree	Agree	Agree	Lack of sufficient information about the vaccine Concerns about safety Concerns about effectively Cost of the vaccine Limited availability of the vaccine Negative media reports	1	1	1	1	0	0	1	0	1	Positive clinical trial results Endorsement by health authorities Cost effectiveness Health education and awareness campaigns Government support and subsidies Trust in healthcare providers Positive media coverage	1	1	1	0	1	1	0	1	1	399560516	19d9f292-3c8e-4f15-b001-de7580b89c5c	2024-10-25 17:29:59
2024-10-25 10:29:59	2024-10-25 10:33:12	Male	21-30 years	Single	Bachelor's degree	Christianity	Pharmacist	1-5 years	No	Agree	Agree	Agree	Agree	Agree	Agree	Agree	Agree		Agree	Agree	Agree	Agree	Agree	Agree	Concerns about safety Cost of the vaccine	0	1	0	1	0	0	0	0	0	Endorsement by health authorities Cost effectiveness	0	1	1	0	0	0	0	0	0	399561489	b0722c7f-13f5-446d-bb85-7c06bee1b062	2024-10-25 17:33:12
2024-10-25 10:33:12	2024-10-25 10:37:58	Female	21-30 years	Single	Bachelor's degree	Christianity	Pharmacist	Less than 1 year	Yes		Agree									Disagree	Strongly disagree	Disagree	Strongly disagree		Lack of sufficient information about the vaccine Concerns about safety Concerns about effectively Parental resistance Lack of trust in healthcare providers	1	1	1	0	1	0	0	1	0	Positive clinical trial results	1	0	0	0	0	0	0	0	0	399563149	5642344e-79f1-48a8-91bf-3ba2b8b1b8cf	2024-10-25 17:38:00
2024-10-25 10:37:59	2024-10-25 10:43:28	Male	21-30 years	Single	Bachelor's degree	Christianity	Pharmacist	Less than 1 year	No	Agree	Agree	Agree	Agree	Agree	Agree	Agree	Agree	Agree	Agree	Agree	Agree	Agree	Agree	Agree	Cost of the vaccine	0	0	0	1	0	0	0	0	0	Cost effectiveness	0	0	1	0	0	0	0	0	0	399565024	1650ff65-bf59-4f3a-a2ee-bec1b76f005a	2024-10-25 17:43:29
2024-10-25 10:43:29	2024-10-25 10:46:31	Male	21-30 years	Single	Bachelor's degree	Christianity	Pharmacist	Less than 1 year	No		Agree	Disagree	Disagree	Disagree	Disagree	Agree	Disagree	Disagree	Disagree						Lack of sufficient information about the vaccine Concerns about safety Concerns about effectively Cost of the vaccine	1	1	1	1	0	0	0	0	0	Positive clinical trial results Endorsement by health authorities Cost effectiveness Health education and awareness campaigns Government support and subsidies	1	1	1	0	1	1	0	0	0	399566116	32e7d6b3-84fd-4601-859f-ee04647b2d01	2024-10-25 17:46:31
2024-10-25 10:46:31	2024-10-25 10:50:11	Female	Less than 20 years	Married	Postdoctoral training	Christianity	Nurse practitioner	Less than 1 year	Yes	Agree	Disagree	Agree	Disagree	Agree	Agree	Disagree	Disagree	Agree	Disagree	Agree	Agree	Agree	Agree	Agree	Lack of sufficient information about the vaccine	1	0	0	0	0	0	0	0	0	Positive clinical trial results Health education and awareness campaigns	1	0	0	0	1	0	0	0	0	399567392	20a1a125-a877-4f42-829b-7eecbbce44fa	2024-10-25 17:50:11
2024-10-25 10:50:12	2024-10-25 10:53:36	Female	21-30 years	Single	Bachelor's degree	Christianity	Others		No	Agree	Agree	Disagree	Agree	Disagree		Agree		Agree	Agree			Agree	Agree	Agree	Lack of sufficient information about the vaccine Concerns about safety Concerns about effectively Parental resistance	1	1	1	0	1	0	0	0	0	Positive clinical trial results Cost effectiveness Availability in local health facilities Positive media coverage	1	0	1	0	0	0	1	0	1	399568511	3d5d7aa2-bc98-40e4-9b2c-e067ce375f68	2024-10-25 17:53:37
2024-10-25 10:53:36	2024-10-25 10:55:29	Female	21-30 years	Single	Doctoral degree	Christianity	Nurse	1-5 years	Yes	Agree	Agree	Agree	Agree	Agree	Agree	Agree	Agree	Agree	Agree	Agree	Agree	Agree	Agree	Agree	Cultural beliefs and practices	0	0	0	0	0	1	0	0	0	Positive clinical trial results	1	0	0	0	0	0	0	0	0	399569092	6869f0de-f23c-41a8-bfc6-d5fcf991652b	2024-10-25 17:55:30
2024-10-25 10:55:29	2024-10-25 11:01:29	Female	Less than 20 years	Single	Doctoral degree	Christianity	Nurse	Less than 1 year	No	Agree	Agree	Agree	Agree	Agree	Agree	Agree	Disagree	Agree	Agree	Agree	Agree	Agree	Agree	Agree	Lack of sufficient information about the vaccine Concerns about safety Cost of the vaccine Parental resistance Cultural beliefs and practices Limited availability of the vaccine Lack of trust in healthcare providers Negative media reports	1	1	0	1	1	1	1	1	1	Positive clinical trial results Endorsement by health authorities Cost effectiveness Health education and awareness campaigns Government support and subsidies Availability in local health facilities Trust in healthcare providers Positive media coverage	1	1	1	0	1	1	1	1	1	399571206	6637f59b-baf7-4bd6-b062-584d46648e8e	2024-10-25 18:01:34
2024-10-25 11:01:29	2024-10-25 11:09:51	Female	21-30 years	Single	National Diploma	Christianity	Others	Less than 1 year	No	Disagree	Strongly agree	Disagree	Agree	Agree	Agree	Agree	Agree	Agree	Agree	Agree	Agree	Disagree	Agree	Agree	Cultural beliefs and practices	0	0	0	0	0	1	0	0	0	Government support and subsidies	0	0	0	0	0	1	0	0	0	399573689	2b2993ad-f684-4204-8165-655d7746b22b	2024-10-25 18:09:52
2024-10-25 11:09:51	2024-10-25 11:12:09	Female	Less than 20 years	Single	National Diploma	Christianity	Others		No	Agree	Agree	Strongly agree	Disagree	Agree	Agree	Strongly agree	Agree	Agree	Strongly agree	Agree	Agree	Agree	Agree	Strongly agree	Lack of sufficient information about the vaccine Concerns about safety	1	1	0	0	0	0	0	0	0	Health education and awareness campaigns	0	0	0	0	1	0	0	0	0	399574311	6d98c1da-da2c-48d7-b5ea-7ec60018a75b	2024-10-25 18:12:09
2024-10-25 11:12:09	2024-10-25 11:14:22	Female	21-30 years	Single	National Diploma	Christianity	Others	Less than 1 year	Yes	Strongly agree	Strongly agree	Strongly agree	Agree	Strongly agree	Strongly agree	Strongly agree	Strongly agree	Strongly agree	Strongly agree	Strongly agree	Strongly agree	Strongly agree	Strongly agree	Strongly agree	Lack of sufficient information about the vaccine Parental resistance Limited availability of the vaccine Lack of trust in healthcare providers Negative media reports	1	0	0	0	1	0	1	1	1	Positive clinical trial results High demand from parents Health education and awareness campaigns Government support and subsidies Availability in local health facilities Trust in healthcare providers Positive media coverage	1	0	0	1	1	1	1	1	1	399574964	8ef8190b-7622-4823-932c-b9b13c01e1ac	2024-10-25 18:14:23
2024-10-25 11:14:23	2024-10-25 11:16:17	Female	Less than 20 years	Single	National Diploma	Christianity	Nurse	Less than 1 year	No	Agree	Agree		Agree	Agree	Agree	Agree	Agree	Agree	Agree	Agree	Agree	Agree	Agree	Agree	Concerns about effectively	0	0	1	0	0	0	0	0	0	Positive clinical trial results	1	0	0	0	0	0	0	0	0	399575824	5d6d688a-2e73-4691-af0b-84c0e0523a18	2024-10-25 18:16:17
2024-10-25 11:16:17	2024-10-25 11:18:30	Female	21-30 years	Single	National Diploma	Christianity	Nurse	Less than 1 year	No	Strongly agree	Strongly agree	Strongly disagree	Disagree	Strongly agree	Agree	Agree	Disagree	Agree	Agree	Agree	Agree	Agree	Agree	Agree	Lack of sufficient information about the vaccine	1	0	0	0	0	0	0	0	0	Cost effectiveness	0	0	1	0	0	0	0	0	0	399576514	64b78962-5abf-478d-8ba9-d59fce07d5c1	2024-10-25 18:18:30
2024-10-25 11:18:30	2024-10-25 11:21:46	Female	21-30 years	Married	National Diploma	Christianity	Others	1-5 years	No	Agree	Disagree	Agree	Strongly agree	Agree	Agree	Agree	Disagree	Strongly agree	Disagree	Agree	Disagree	Disagree	Agree	Disagree	Cost of the vaccine Limited availability of the vaccine	0	0	0	1	0	0	1	0	0	Health education and awareness campaigns Availability in local health facilities	0	0	0	0	1	0	1	0	0	399577354	e5d043cf-bb39-4eb6-a5e2-40d7ab16b8b9	2024-10-25 18:21:47
2024-10-25 11:21:46	2024-10-25 11:23:39	Female	21-30 years	Single	Bachelor's degree	Christianity			Yes	Agree	Agree					Agree			Agree	Agree	Agree	Agree	Agree	Agree	Lack of sufficient information about the vaccine Concerns about effectively Cost of the vaccine Parental resistance	1	0	1	1	1	0	0	0	0	Positive clinical trial results Endorsement by health authorities Cost effectiveness High demand from parents Health education and awareness campaigns Government support and subsidies Availability in local health facilities Trust in healthcare providers Positive media coverage	1	1	1	1	1	1	1	1	1	399577993	a32d10f5-9d3b-4a9a-b094-001e8814639d	2024-10-25 18:23:39
2024-10-25 11:23:39	2024-10-25 11:25:59	Female	21-30 years	Single	National Diploma	Christianity	Nurse	1-5 years		Agree	Agree	Agree	Agree	Agree	Agree	Agree	Agree	Agree	Agree	Agree	Agree	Agree	Agree	Agree	Concerns about safety	0	1	0	0	0	0	0	0	0	Positive clinical trial results	1	0	0	0	0	0	0	0	0	399578567	172b24ea-2f61-4686-ba0b-a127c04c569c	2024-10-25 18:26:00
2024-10-25 11:26:00	2024-10-25 12:48:35	Male	21-30 years	Single	Bachelor's degree	Christianity	Nurse	Less than 1 year	No	Disagree	Agree	Disagree	Disagree	Disagree	Agree	Agree	Disagree	Agree	Agree	Disagree	Disagree	Agree	Agree	Agree	Lack of sufficient information about the vaccine Concerns about safety Concerns about effectively Cost of the vaccine Cultural beliefs and practices Lack of trust in healthcare providers	1	1	1	1	0	1	0	1	0	Positive clinical trial results Cost effectiveness Health education and awareness campaigns Government support and subsidies Trust in healthcare providers	1	0	1	0	1	1	0	1	0	399600232	5c107f8d-f8e0-420b-b3fa-2c78c38cc2a5	2024-10-25 19:48:35
2024-10-25 12:48:35	2024-10-25 12:51:37	Female	21-30 years	Married	Bachelor's degree	Christianity	Pediatric doctor	1-5 years	No	Agree	Agree	Agree	Agree	Agree	Agree	Agree	Agree	Agree	Agree	Agree	Agree	Agree	Agree	Agree	Lack of sufficient information about the vaccine Concerns about safety Cost of the vaccine Limited availability of the vaccine Negative media reports	1	1	0	1	0	0	1	0	1	Positive clinical trial results Cost effectiveness Health education and awareness campaigns Government support and subsidies Availability in local health facilities Trust in healthcare providers Positive media coverage	1	0	1	0	1	1	1	1	1	399600839	f1c80110-25be-4ae8-b29b-4276a1d48a9f	2024-10-25 19:51:37
2024-10-25 12:51:37	2024-10-25 12:53:30	Female	21-30 years	Single	Bachelor's degree	Christianity	Nurse	1-5 years	No	Agree	Agree	Agree	Agree	Agree	Agree	Agree	Agree	Agree	Agree	Agree	Agree	Agree	Agree	Agree	Lack of sufficient information about the vaccine	1	0	0	0	0	0	0	0	0	Health education and awareness campaigns	0	0	0	0	1	0	0	0	0	399601174	1b7e8a82-d886-4297-8777-5086b7652db6	2024-10-25 19:53:31
2024-10-25 12:53:30	2024-10-25 12:55:46	Female	21-30 years	Single	Bachelor's degree	Christianity	Others	Less than 1 year	Yes	Strongly agree	Agree	Strongly agree	Strongly agree	Strongly agree	Strongly agree	Strongly agree	Strongly agree	Strongly agree	Strongly agree	Strongly agree	Strongly agree	Strongly agree	Agree	Strongly agree	Lack of sufficient information about the vaccine Cost of the vaccine Lack of trust in healthcare providers Negative media reports	1	0	0	1	0	0	0	1	1	Government support and subsidies Availability in local health facilities Trust in healthcare providers Positive media coverage	0	0	0	0	0	1	1	1	1	399601867	ac3f4323-969c-47db-a507-54a4cffbbf45	2024-10-25 19:55:47
2024-10-25 12:55:47	2024-10-25 12:57:49	Female	Less than 20 years	Single	National Diploma	Christianity	Others	Less than 1 year	No	Agree	Agree	Agree	Agree	Agree	Agree	Agree	Agree	Agree	Agree	Agree	Agree	Agree	Agree	Agree	Concerns about safety	0	1	0	0	0	0	0	0	0	Endorsement by health authorities	0	1	0	0	0	0	0	0	0	399602530	5cc37860-60c3-42c1-8921-c500dd2c1a14	2024-10-25 19:57:50
2024-10-25 12:57:49	2024-10-25 12:58:48	Female	21-30 years	Single		Christianity			No																Lack of sufficient information about the vaccine	1	0	0	0	0	0	0	0	0	Health education and awareness campaigns	0	0	0	0	1	0	0	0	0	399602815	37597d90-27b6-4afa-99c5-09112b4a7f92	2024-10-25 19:58:52
2024-10-25 12:58:48	2024-10-25 13:00:47	Female	21-30 years	Single	Bachelor's degree	Christianity	Pediatric doctor	Less than 1 year	Yes	Agree	Agree	Agree	Agree	Agree	Agree	Agree	Agree	Agree	Agree	Agree	Agree	Agree	Agree	Agree	Lack of sufficient information about the vaccine Concerns about safety Concerns about effectively Cost of the vaccine Cultural beliefs and practices Limited availability of the vaccine Lack of trust in healthcare providers Negative media reports	1	1	1	1	0	1	1	1	1	Positive clinical trial results Endorsement by health authorities Cost effectiveness Health education and awareness campaigns Government support and subsidies Availability in local health facilities Trust in healthcare providers Positive media coverage	1	1	1	0	1	1	1	1	1	399603460	acbff0f0-6e70-4def-95ee-f247fbdb99d2	2024-10-25 20:00:48
2024-10-25 13:00:47	2024-10-25 13:02:55	Male	21-30 years	Single	Bachelor's degree	Christianity	Others	Less than 1 year	Yes	Agree	Strongly disagree	Agree	Agree	Agree	Agree	Agree	Agree	Agree	Agree	Agree	Agree	Agree	Agree	Agree	Parental resistance	0	0	0	0	1	0	0	0	0	High demand from parents	0	0	0	1	0	0	0	0	0	399604036	eb65be8f-6b2f-4199-a773-e8ebfb912106	2024-10-25 20:02:55
2024-10-25 13:02:55	2024-10-25 13:04:53	Female	21-30 years	Single	Doctoral degree	Christianity	Pediatric doctor	Less than 1 year	No	Agree	Agree	Agree	Agree	Agree	Agree	Agree	Agree	Agree	Agree	Agree	Agree	Agree	Agree	Agree	Concerns about safety Cost of the vaccine	0	1	0	1	0	0	0	0	0	Positive clinical trial results Endorsement by health authorities High demand from parents Government support and subsidies Trust in healthcare providers	1	1	0	1	0	1	0	1	0	399604583	e2660fb4-f93b-4989-a576-5d6a9a4ce1b7	2024-10-25 20:04:54
2024-10-25 13:04:53	2024-10-25 13:08:22	Female	21-30 years	Single	Bachelor's degree	Christianity	Pediatric doctor	Less than 1 year	No	Disagree	Agree	Disagree	Disagree	Disagree	Disagree	Agree	Disagree	Agree	Agree	Disagree	Disagree	Disagree	Disagree	Disagree	Lack of sufficient information about the vaccine Concerns about safety Cost of the vaccine	1	1	0	1	0	0	0	0	0	Positive clinical trial results	1	0	0	0	0	0	0	0	0	399605587	0da452c7-d7da-443a-a62c-f7f36a26f12f	2024-10-25 20:08:23
2024-10-25 13:08:22	2024-10-25 13:11:00	Female	31-40 years	Married	Master's degree	Christianity	Others		No	Agree	Agree	Agree	Disagree	Disagree	Disagree	Disagree	Disagree	Disagree	Disagree	Disagree	Agree	Agree	Agree	Agree	Cost of the vaccine Cultural beliefs and practices	0	0	0	1	0	1	0	0	0	Cost effectiveness	0	0	1	0	0	0	0	0	0	399606162	b25fd63d-6de1-45cc-b02e-509e9bc84bcb	2024-10-25 20:11:00
2024-10-25 13:11:00	2024-10-25 13:13:58	Female	21-30 years	Single		Christianity	Others		No	Strongly disagree	Strongly disagree	Strongly disagree	Strongly disagree	Strongly disagree	Strongly disagree	Strongly disagree	Strongly disagree	Strongly disagree	Strongly disagree	Strongly disagree	Strongly disagree	Strongly disagree	Strongly disagree	Strongly disagree	Lack of sufficient information about the vaccine Concerns about safety Concerns about effectively Cost of the vaccine Parental resistance Cultural beliefs and practices Limited availability of the vaccine Lack of trust in healthcare providers Negative media reports	1	1	1	1	1	1	1	1	1	Positive clinical trial results Endorsement by health authorities Cost effectiveness High demand from parents Health education and awareness campaigns Government support and subsidies Availability in local health facilities Trust in healthcare providers Positive media coverage	1	1	1	1	1	1	1	1	1	399606788	50690cf8-3fa7-4f33-bb9e-d1e7bb5459f3	2024-10-25 20:14:02
2024-10-25 13:13:58	2024-10-25 13:17:00	Female	21-30 years	Single	National Diploma	Christianity	Others	Less than 1 year	Yes	Strongly agree	Agree	Strongly agree	Strongly agree	Strongly agree	Agree	Agree	Agree	Agree	Agree	Agree	Agree	Agree	Agree	Strongly agree	Negative media reports	0	0	0	0	0	0	0	0	1	Positive clinical trial results	1	0	0	0	0	0	0	0	0	399607614	9d32b002-9fa8-402f-905c-ac0e740c716b	2024-10-25 20:17:00
2024-10-25 13:17:00	2024-10-25 13:23:08	Female	Less than 20 years	Single	National Diploma	Christianity	Laboratory technician	1-5 years	Yes		Agree	Agree	Agree	Agree	Agree	Agree	Agree	Agree	Agree	Agree	Agree	Agree	Agree	Agree	Lack of sufficient information about the vaccine Concerns about safety Concerns about effectively	1	1	1	0	0	0	0	0	0	Government support and subsidies	0	0	0	0	0	1	0	0	0	399608734	1d1eb61f-1b58-4a5a-b7ee-fdf02ddb71f2	2024-10-25 20:23:09
2024-10-25 13:23:08	2024-10-25 13:26:04	Female	21-30 years	Single	National Diploma	Christianity	Laboratory technician	1-5 years	Yes	Agree	Disagree	Agree	Strongly disagree	Agree	Agree	Agree	Agree	Agree	Agree	Agree	Agree	Agree	Agree	Agree	Lack of sufficient information about the vaccine Concerns about safety Concerns about effectively	1	1	1	0	0	0	0	0	0	Positive clinical trial results Health education and awareness campaigns Availability in local health facilities Trust in healthcare providers Positive media coverage	1	0	0	0	1	0	1	1	1	399609237	6408195c-3cc5-4e26-bd59-d9420803b908	2024-10-25 20:26:05
2024-10-25 13:26:05	2024-10-25 13:33:42	Female	21-30 years	Single	Bachelor's degree	Christianity	Nurse	Less than 1 year	No	Disagree	Strongly agree	Strongly agree	Agree	Strongly disagree	Disagree	Agree	Disagree	Strongly agree	Strongly agree	Strongly disagree	Strongly disagree	Disagree	Disagree	Agree	Concerns about safety Cost of the vaccine Limited availability of the vaccine Lack of trust in healthcare providers	0	1	0	1	0	0	1	1	0	Positive clinical trial results Cost effectiveness Health education and awareness campaigns Availability in local health facilities Trust in healthcare providers	1	0	1	0	1	0	1	1	0	399610789	55ea10e3-429e-4b4e-a205-feb6236f48f9	2024-10-25 20:33:43
2024-10-25 13:33:42	2024-10-25 13:41:13	Female	Less than 20 years	Single	National Diploma	Christianity	Nurse	Less than 1 year	No	Disagree	Agree	Disagree	Disagree	Disagree	Agree	Agree	Disagree	Agree	Agree	Disagree	Strongly disagree	Disagree	Disagree	Agree	Lack of sufficient information about the vaccine Concerns about safety Concerns about effectively Cost of the vaccine Parental resistance Cultural beliefs and practices Limited availability of the vaccine Lack of trust in healthcare providers Negative media reports	1	1	1	1	1	1	1	1	1	Positive clinical trial results Endorsement by health authorities High demand from parents Health education and awareness campaigns Government support and subsidies Trust in healthcare providers Positive media coverage	1	1	0	1	1	1	0	1	1	399612296	3ce2750f-7b7e-4621-8cc0-ed9dc32793b4	2024-10-25 20:41:14
2024-10-25 13:41:13	2024-10-25 13:43:47	Female	21-30 years	Single	Bachelor's degree	Christianity	Nurse	Less than 1 year	No	Strongly disagree	Strongly disagree	Strongly disagree	Strongly disagree	Strongly disagree	Strongly disagree	Strongly disagree	Strongly disagree	Strongly disagree	Strongly disagree	Strongly disagree	Strongly disagree	Strongly disagree	Strongly disagree	Strongly disagree	Lack of sufficient information about the vaccine Concerns about safety Concerns about effectively Cost of the vaccine Parental resistance Cultural beliefs and practices Limited availability of the vaccine Lack of trust in healthcare providers Negative media reports	1	1	1	1	1	1	1	1	1	Positive clinical trial results Endorsement by health authorities Cost effectiveness Health education and awareness campaigns Government support and subsidies Availability in local health facilities Trust in healthcare providers Positive media coverage	1	1	1	0	1	1	1	1	1	399612800	960b60ee-24c0-4583-abf6-0cac2a491ce7	2024-10-25 20:43:47
2024-10-25 13:43:47	2024-10-25 13:59:01	Female	21-30 years	Single	Bachelor's degree	Christianity	Others	Less than 1 year	No	Agree	Agree	Agree	Agree	Agree	Strongly agree	Strongly agree	Strongly agree	Disagree	Agree	Agree	Strongly agree	Strongly agree	Strongly agree	Strongly agree	Lack of sufficient information about the vaccine Cost of the vaccine Parental resistance Cultural beliefs and practices Negative media reports	1	0	0	1	1	1	0	0	1	Positive clinical trial results Endorsement by health authorities Cost effectiveness Government support and subsidies Availability in local health facilities Trust in healthcare providers Positive media coverage	1	1	1	0	0	1	1	1	1	399615546	53397d24-070f-4e61-a87f-d254bd9433e8	2024-10-25 20:59:03
2024-10-25 13:59:01	2024-10-25 14:01:28	Female	21-30 years	Single	Bachelor's degree	Christianity	Nurse	Less than 1 year	No	Strongly disagree	Strongly agree	Disagree	Disagree	Agree	Strongly disagree	Agree	Disagree	Disagree	Agree	Disagree	Agree	Agree	Agree	Agree	Lack of sufficient information about the vaccine Concerns about safety Concerns about effectively Cost of the vaccine Cultural beliefs and practices	1	1	1	1	0	1	0	0	0	Positive clinical trial results Cost effectiveness High demand from parents Health education and awareness campaigns Availability in local health facilities Trust in healthcare providers	1	0	1	1	1	0	1	1	0	399616125	b093aac5-a2c3-4ffd-8ab6-f9db18de29d0	2024-10-25 21:01:33
2024-10-25 14:01:28	2024-10-25 14:04:48	Male	31-40 years	Single	Master's degree	Christianity	Pharmacist	1-5 years	Yes	Strongly agree	Agree	Agree	Agree	Agree		Agree	Agree	Agree	Agree	Strongly agree		Strongly agree		Agree	Lack of sufficient information about the vaccine	1	0	0	0	0	0	0	0	0	Availability in local health facilities	0	0	0	0	0	0	1	0	0	399616684	00badfde-25e6-496c-aef0-88a37b5ba964	2024-10-25 21:04:49
2024-10-25 14:04:49	2024-10-25 14:07:53	Female	31-40 years	Single	National Diploma		Nurse	1-5 years	Yes	Strongly agree	Agree	Agree	Agree	Agree	Agree	Agree	Agree	Agree	Agree	Agree	Agree	Agree	Agree	Agree	Lack of sufficient information about the vaccine Lack of trust in healthcare providers	1	0	0	0	0	0	0	1	0	Endorsement by health authorities Availability in local health facilities Positive media coverage	0	1	0	0	0	0	1	0	1	399617305	c2e3f3ac-7435-4dc7-868d-3e0f0d174e3b	2024-10-25 21:07:53
2024-10-25 14:07:53	2024-10-25 14:13:45	Female	41-50 years	Married	Bachelor's degree	Christianity	Nurse practitioner	11-15 years	Yes	Agree	Agree	Agree	Agree	Agree	Agree	Agree	Agree	Agree	Agree	Agree	Agree	Agree	Agree	Agree	Parental resistance Cultural beliefs and practices	0	0	0	0	1	1	0	0	0	Availability in local health facilities Positive media coverage	0	0	0	0	0	0	1	0	1	399618432	6b39cabc-9966-4ffb-a3a9-290dd8c1fc89	2024-10-25 21:13:45
2024-10-25 14:13:45	2024-10-25 14:15:59	Female	31-40 years	Single	National Diploma	Christianity	Nurse	1-5 years	Yes	Agree	Agree	Agree	Agree	Agree	Agree	Agree	Agree	Agree	Agree	Agree	Agree	Agree	Agree	Agree	Concerns about safety Parental resistance Negative media reports	0	1	0	0	1	0	0	0	1	Positive clinical trial results Endorsement by health authorities Health education and awareness campaigns Trust in healthcare providers Positive media coverage	1	1	0	0	1	0	0	1	1	399618792	bdd6b928-1472-429d-b01f-89a4b1038a98	2024-10-25 21:15:59
2024-10-25 14:15:59	2024-10-25 14:19:55	Female	31-40 years	Married		Christianity	Nurse	1-5 years	Yes	Agree	Agree	Agree	Agree	Agree	Agree	Agree	Agree	Agree	Agree	Agree		Agree	Agree	Agree	Cultural beliefs and practices	0	0	0	0	0	1	0	0	0											399619301	7c43e267-689b-4ac7-9385-92f8d1d2c5d8	2024-10-25 21:19:55
2024-10-25 14:19:55	2024-10-25 14:22:56	Male	41-50 years	Married	Master's degree	Christianity	Pediatric doctor	11-15 years	Yes	Strongly agree	Agree	Agree	Agree	Agree	Agree	Agree	Agree	Agree	Agree	Agree	Agree	Agree	Agree	Agree	Concerns about effectively Lack of trust in healthcare providers	0	0	1	0	0	0	0	1	0	Health education and awareness campaigns Trust in healthcare providers	0	0	0	0	1	0	0	1	0	399619794	55458aad-60ba-4bd4-ae7c-58a00c2f905f	2024-10-25 21:22:56
2024-10-25 14:22:56	2024-10-25 14:24:57	Female		Single		Christianity	Nurse practitioner	1-5 years	Yes	Agree	Agree	Agree	Agree	Agree	Agree	Agree	Agree	Agree	Agree	Agree	Agree	Agree	Agree	Agree	Limited availability of the vaccine	0	0	0	0	0	0	1	0	0	Health education and awareness campaigns	0	0	0	0	1	0	0	0	0	399620166	512d8059-d31d-4ece-8edd-d5b984a75749	2024-10-25 21:25:00
2024-10-26 10:13:01	2024-10-26 10:17:10	Male	21-30 years	Single		Christianity	Others	Less than 1 year	Yes	Agree	Agree	Agree	Agree	Agree	Agree	Agree	Agree	Agree	Agree	Agree	Agree	Agree	Agree	Agree	Limited availability of the vaccine	0	0	0	0	0	0	1	0	0	Positive clinical trial results	1	0	0	0	0	0	0	0	0	399856664	144e063a-b17d-4f8c-b2db-03be40466f36	2024-10-26 17:17:10
2024-10-26 10:17:10	2024-10-26 10:19:26	Male	21-30 years	Single	National Diploma	Christianity	Others	Less than 1 year	No	Agree	Agree		Agree	Agree	Agree	Agree		Disagree	Disagree	Disagree	Disagree	Disagree	Agree	Agree	Lack of sufficient information about the vaccine Cost of the vaccine Parental resistance	1	0	0	1	1	0	0	0	0	High demand from parents Health education and awareness campaigns Availability in local health facilities	0	0	0	1	1	0	1	0	0	399857467	1ec0f749-0f65-4d37-b1de-a7b01f9c3c5f	2024-10-26 17:19:26
2024-10-26 10:19:26	2024-10-26 10:21:52	Female	21-30 years	Single		Christianity	Others		No	Agree	Agree	Agree	Agree	Agree	Agree	Agree	Agree	Agree	Agree	Agree	Agree	Agree	Agree	Agree	Lack of sufficient information about the vaccine	1	0	0	0	0	0	0	0	0	Health education and awareness campaigns	0	0	0	0	1	0	0	0	0	399858393	c74b43c2-1732-49aa-8806-521b4ab502de	2024-10-26 17:21:52
2024-10-26 10:21:52	2024-10-26 10:23:41	Female	21-30 years	Single		Christianity	Others		No	Agree	Strongly agree	Agree		Disagree	Agree	Agree	Agree	Agree	Agree	Disagree	Disagree	Agree	Agree	Agree	Lack of sufficient information about the vaccine Limited availability of the vaccine Lack of trust in healthcare providers	1	0	0	0	0	0	1	1	0	Positive clinical trial results Endorsement by health authorities	1	1	0	0	0	0	0	0	0	399858869	b6c7be78-6a92-4ca9-a3e8-5de4c23a9dde	2024-10-26 17:23:48
2024-10-26 10:23:42	2024-10-26 10:25:49		21-30 years	Single	Master's degree	Christianity	Others	1-5 years	Yes	Strongly agree	Strongly agree	Strongly agree	Strongly agree	Strongly agree	Strongly agree		Disagree	Disagree	Disagree	Disagree	Strongly agree	Strongly agree	Agree	Disagree	Concerns about effectively Parental resistance Limited availability of the vaccine	0	0	1	0	1	0	1	0	0	Positive clinical trial results Cost effectiveness Government support and subsidies Trust in healthcare providers	1	0	1	0	0	1	0	1	0	399859236	a1dfb517-8fe5-42e3-8bfb-ef620356ef85	2024-10-26 17:25:54
2024-10-26 10:25:49	2024-10-26 10:27:25	Female	21-30 years	Single	Bachelor's degree	Christianity	Nurse	Less than 1 year	No	Agree	Agree	Agree	Agree	Agree	Agree	Disagree	Agree	Agree	Agree	Agree	Agree	Agree	Agree	Agree	Cost of the vaccine	0	0	0	1	0	0	0	0	0	Health education and awareness campaigns	0	0	0	0	1	0	0	0	0	399859571	e62ed207-243b-4c62-9927-4f7b5db1f675	2024-10-26 17:27:28
2024-10-26 10:27:25	2024-10-26 10:28:47	Female	21-30 years	Single	National Diploma	Christianity	Others	Less than 1 year	Yes	Agree	Agree	Agree	Agree	Agree	Agree	Agree	Agree	Agree	Agree																										399859926	e80d9536-163e-4748-8011-d99253823b48	2024-10-26 17:28:48
2024-10-26 10:28:47	2024-10-26 10:30:55	Female	Less than 20 years	Single		Christianity	Nurse practitioner		No	Agree	Agree	Agree	Agree	Agree	Agree	Agree	Agree	Agree	Agree	Agree	Disagree	Agree	Agree	Agree	Lack of sufficient information about the vaccine Concerns about safety Cost of the vaccine Cultural beliefs and practices	1	1	0	1	0	1	0	0	0	Positive clinical trial results Endorsement by health authorities Cost effectiveness High demand from parents Health education and awareness campaigns	1	1	1	1	1	0	0	0	0	399860460	02b9fb4f-2801-44e0-bf6c-58c91923bb3d	2024-10-26 17:30:59
2024-10-26 10:30:56	2024-10-26 10:32:49	Female	21-30 years	Single	National Diploma	Christianity	Public Health practitioner	Less than 1 year	No	Agree	Agree	Agree	Agree	Agree	Agree	Agree	Agree	Agree	Agree	Agree	Agree	Agree	Agree	Agree	Concerns about effectively	0	0	1	0	0	0	0	0	0	Government support and subsidies	0	0	0	0	0	1	0	0	0	399860838	4705090b-3596-43e6-ad37-b1e37218c756	2024-10-26 17:32:53
2024-10-26 10:32:49	2024-10-26 10:36:20	Male	21-30 years	Single	Master's degree	Christianity	Others	1-5 years	No	Agree	Strongly agree	Strongly disagree	Strongly disagree	Strongly disagree	Strongly disagree	Strongly disagree	Strongly disagree	Agree	Strongly agree	Strongly agree	Strongly agree	Strongly agree	Strongly agree	Strongly agree	Lack of sufficient information about the vaccine Concerns about safety Concerns about effectively Cost of the vaccine Parental resistance Cultural beliefs and practices Limited availability of the vaccine Lack of trust in healthcare providers Negative media reports	1	1	1	1	1	1	1	1	1	Positive clinical trial results Endorsement by health authorities Cost effectiveness High demand from parents Health education and awareness campaigns Government support and subsidies Availability in local health facilities Trust in healthcare providers Positive media coverage	1	1	1	1	1	1	1	1	1	399861748	b14b9faa-3cd4-4a24-b0c3-b1298a958133	2024-10-26 17:36:21
2024-10-26 10:36:21	2024-10-26 10:38:05	Female	21-30 years	Married	National Diploma	Christianity	Nurse	1-5 years	No	Agree	Agree	Agree	Agree	Strongly agree	Strongly agree	Agree	Agree	Agree	Strongly agree	Agree	Agree	Agree	Strongly agree	Strongly agree	Cost of the vaccine	0	0	0	1	0	0	0	0	0	Trust in healthcare providers	0	0	0	0	0	0	0	1	0	399862274	bcd1e376-c8e6-4f07-a031-47f7856ba096	2024-10-26 17:38:12
2024-10-26 10:38:06	2024-10-26 10:40:16	Female	Less than 20 years	Single		Christianity	Nurse	Less than 1 year	No	Agree	Agree	Disagree	Agree	Agree	Agree	Agree	Disagree	Agree	Agree	Disagree	Disagree	Agree	Disagree	Agree	Lack of sufficient information about the vaccine Concerns about safety Concerns about effectively Cost of the vaccine Cultural beliefs and practices Negative media reports	1	1	1	1	0	1	0	0	1	Positive clinical trial results Endorsement by health authorities Cost effectiveness Health education and awareness campaigns Availability in local health facilities Positive media coverage	1	1	1	0	1	0	1	0	1	399862656	674abe7c-0fd8-4888-b72b-a4cc9b428f07	2024-10-26 17:40:16
2024-10-26 10:40:16	2024-10-26 10:47:01									Agree	Strongly agree	Agree	Agree	Agree	Agree	Agree	Agree	Disagree	Agree	Agree	Disagree	Agree	Agree	Agree	Cost of the vaccine	0	0	0	1	0	0	0	0	0	Cost effectiveness	0	0	1	0	0	0	0	0	0	399864095	88e19214-4bb4-4243-9403-f2c2efb90c32	2024-10-26 17:47:02
2024-10-26 10:47:01	2024-10-26 10:48:49	Male	31-40 years	Single	Bachelor's degree	Christianity	Pharmacist	6-10 years	Yes	Strongly agree	Agree	Agree	Agree	Agree	Agree	Agree	Agree	Agree	Agree	Agree	Agree	Agree	Agree	Agree	Cultural beliefs and practices	0	0	0	0	0	1	0	0	0	Health education and awareness campaigns Availability in local health facilities Trust in healthcare providers	0	0	0	0	1	0	1	1	0	399864414	30fd0206-f566-435b-9a41-8c39edd9fa10	2024-10-26 17:48:49
2024-10-26 10:48:49	2024-10-26 10:50:35	Male	21-30 years	Single	Bachelor's degree	Christianity				Disagree	Disagree	Disagree	Disagree	Disagree	Agree	Agree	Agree	Agree	Agree	Agree	Agree	Agree	Agree	Agree	Lack of sufficient information about the vaccine Concerns about safety Cost of the vaccine Cultural beliefs and practices	1	1	0	1	0	1	0	0	0	Positive clinical trial results Cost effectiveness Health education and awareness campaigns Availability in local health facilities Positive media coverage	1	0	1	0	1	0	1	0	1	399864790	79af6457-62ef-49cb-8448-fd28ed784839	2024-10-26 17:50:36
2024-10-26 10:50:36	2024-10-26 10:52:17	Female	21-30 years	Single	National Diploma	Christianity	Nurse	Less than 1 year	No	Agree	Agree	Agree	Agree	Agree	Agree	Agree	Agree	Agree	Agree	Agree	Agree	Agree	Agree	Agree	Lack of sufficient information about the vaccine Concerns about safety Concerns about effectively Cost of the vaccine	1	1	1	1	0	0	0	0	0	Endorsement by health authorities Health education and awareness campaigns	0	1	0	0	1	0	0	0	0	399865146	b979943e-2b8c-424b-930d-cb743edd190d	2024-10-26 17:52:20
2024-10-26 10:52:17	2024-10-26 10:54:55	Female	21-30 years	Single	National Diploma	Christianity	Nurse	Less than 1 year	No	Agree	Agree	Disagree	Agree	Agree	Agree	Strongly disagree	Disagree	Strongly agree	Strongly agree	Agree	Strongly agree	Strongly agree	Strongly agree	Strongly agree	Cost of the vaccine Cultural beliefs and practices Negative media reports	0	0	0	1	0	1	0	0	1	Positive clinical trial results Endorsement by health authorities Health education and awareness campaigns Government support and subsidies	1	1	0	0	1	1	0	0	0	399865725	15a901a5-5888-4f52-a0fe-4339d7067c62	2024-10-26 17:54:55
2024-10-26 10:54:55	2024-10-26 10:57:16	Female	21-30 years	Single	National Diploma	Christianity	Laboratory technician	Less than 1 year	No	Agree	Agree	Agree	Agree	Agree	Agree	Agree	Agree	Agree	Agree	Disagree	Agree	Agree	Disagree	Agree	Lack of sufficient information about the vaccine Concerns about safety Concerns about effectively	1	1	1	0	0	0	0	0	0	Positive clinical trial results Health education and awareness campaigns Trust in healthcare providers Positive media coverage	1	0	0	0	1	0	0	1	1	399866277	62ec05a4-1fd9-4fe8-a830-58318cdba50d	2024-10-26 17:57:19
2024-10-26 10:57:16	2024-10-26 10:59:21	Female	21-30 years	Single		Christianity	Nurse practitioner	1-5 years	No		Strongly agree		Agree	Agree	Agree	Strongly agree	Agree	Disagree	Disagree	Agree	Strongly disagree	Agree	Agree	Agree	Concerns about effectively Parental resistance Limited availability of the vaccine	0	0	1	0	1	0	1	0	0	High demand from parents Positive media coverage	0	0	0	1	0	0	0	0	1	399866954	c5a56dbd-3ece-4ce8-bbf9-f9ed6761e9bf	2024-10-26 17:59:29
2024-10-26 10:59:21	2024-10-26 11:01:19	Female	Less than 20 years	Single		Christianity	Others	Less than 1 year	Yes	Agree	Agree	Agree	Agree	Agree	Agree	Agree	Agree	Agree	Agree	Agree	Agree	Agree	Agree	Agree	Lack of sufficient information about the vaccine	1	0	0	0	0	0	0	0	0	Positive clinical trial results Health education and awareness campaigns	1	0	0	0	1	0	0	0	0	399867495	5c2211ff-fbdc-4f70-aedd-9da91850ca86	2024-10-26 18:01:19
2024-10-26 11:01:19	2024-10-26 11:03:01	Female	Less than 20 years	Single	Bachelor's degree	Christianity	Nurse	1-5 years	No	Agree	Agree	Agree	Agree	Agree	Agree	Agree	Agree	Agree	Agree	Agree	Disagree	Disagree	Disagree	Agree	Lack of sufficient information about the vaccine Lack of trust in healthcare providers	1	0	0	0	0	0	0	1	0	Cost effectiveness Availability in local health facilities	0	0	1	0	0	0	1	0	0	399867895	5e15efe2-5f25-4b37-b635-85c5f72d74b7	2024-10-26 18:03:01
2024-10-26 11:03:02	2024-10-26 11:05:55	Female		Single	Bachelor's degree	Christianity	Nurse	1-5 years	No	Agree	Agree	Agree	Agree	Agree	Agree	Agree	Agree	Agree	Agree	Agree	Agree	Agree	Agree	Agree	Lack of sufficient information about the vaccine	1	0	0	0	0	0	0	0	0	Positive clinical trial results	1	0	0	0	0	0	0	0	0	399868678	7022187d-db54-4b35-af35-d31082ba06b2	2024-10-26 18:05:55
2024-10-26 11:05:55	2024-10-26 11:08:06	Male	Less than 20 years	Single		Christianity	Nurse	Less than 1 year	No	Agree	Strongly agree	Agree	Agree	Agree	Agree	Agree	Agree	Agree	Agree	Agree	Agree	Agree	Agree	Agree	Concerns about safety Concerns about effectively Cost of the vaccine Parental resistance Cultural beliefs and practices Limited availability of the vaccine Lack of trust in healthcare providers Negative media reports	0	1	1	1	1	1	1	1	1	Positive clinical trial results Endorsement by health authorities Cost effectiveness Health education and awareness campaigns Government support and subsidies Availability in local health facilities Trust in healthcare providers	1	1	1	0	1	1	1	1	0	399868940	b786ce14-1d08-4dbc-b8c0-66806e5d171e	2024-10-26 18:08:07
2024-10-26 11:08:06	2024-10-26 11:10:53	Male	21-30 years	Married	Bachelor's degree	Islam		1-5 years	No	Agree	Agree	Disagree	Disagree	Disagree	Strongly agree	Disagree	Agree	Strongly disagree	Strongly agree	Disagree	Disagree	Agree	Strongly disagree	Disagree	Concerns about safety	0	1	0	0	0	0	0	0	0	Positive clinical trial results	1	0	0	0	0	0	0	0	0	399869587	bcb69b8e-2bcf-4c96-a83d-c6c7bbd6da0f	2024-10-26 18:11:07
2024-10-26 11:10:54	2024-10-26 11:12:47	Female	21-30 years	Married	Master's degree	Christianity	Nurse	1-5 years	Yes	Agree	Agree	Agree	Agree	Agree	Agree	Agree	Agree	Agree	Agree	Agree	Agree	Agree	Agree	Agree	Lack of sufficient information about the vaccine Concerns about safety Cost of the vaccine	1	1	0	1	0	0	0	0	0	Positive clinical trial results Health education and awareness campaigns Government support and subsidies Availability in local health facilities	1	0	0	0	1	1	1	0	0	399869952	ab807bb7-caa5-4add-b254-6f339d041107	2024-10-26 18:12:49
2024-10-26 11:12:47	2024-10-26 11:14:57	Female	31-40 years	Married	Bachelor's degree	Christianity	Nurse	6-10 years	No	Agree	Strongly agree	Agree	Agree	Agree	Agree	Agree	Agree	Agree	Agree	Agree	Agree	Agree	Agree	Agree	Lack of sufficient information about the vaccine Concerns about safety Concerns about effectively Cost of the vaccine Limited availability of the vaccine Negative media reports	1	1	1	1	0	0	1	0	1	Positive clinical trial results Endorsement by health authorities Cost effectiveness Government support and subsidies Availability in local health facilities Trust in healthcare providers	1	1	1	0	0	1	1	1	0	399870495	4400491a-90f1-45bb-9654-a72a1da41f47	2024-10-26 18:14:57
2024-10-26 11:14:57	2024-10-26 11:16:52	Female	21-30 years	Single		Christianity	Others	Less than 1 year	Yes	Agree	Agree	Agree	Agree	Agree	Agree	Agree	Agree	Agree	Agree	Agree	Agree	Agree	Agree	Agree	Lack of sufficient information about the vaccine	1	0	0	0	0	0	0	0	0	Health education and awareness campaigns	0	0	0	0	1	0	0	0	0	399870855	206bf4d5-9a2f-454b-aed8-d80a35aa6bde	2024-10-26 18:16:52
2024-10-26 11:16:53	2024-10-26 11:19:16	Female	41-50 years	Married	Master's degree	Christianity	Nurse	11-15 years	Yes	Agree	Agree	Agree	Agree	Agree	Strongly agree	Strongly agree	Agree	Agree	Agree	Strongly agree	Strongly agree	Strongly agree	Agree	Agree	Concerns about safety Concerns about effectively Limited availability of the vaccine Negative media reports	0	1	1	0	0	0	1	0	1	Positive clinical trial results Endorsement by health authorities Cost effectiveness Health education and awareness campaigns Government support and subsidies Availability in local health facilities Positive media coverage	1	1	1	0	1	1	1	0	1	399871226	1d17c6f8-4c7e-41d3-a75f-cffa036d1ad9	2024-10-26 18:19:17
2024-10-26 11:19:16	2024-10-26 11:24:37	Female	21-30 years	Single	National Diploma	Christianity	Nurse	1-5 years	No	Disagree	Agree	Strongly disagree	Strongly disagree	Agree	Disagree	Disagree	Strongly disagree	Disagree	Strongly disagree	Strongly disagree	Disagree	Disagree	Agree	Agree	Lack of sufficient information about the vaccine Concerns about safety Concerns about effectively	1	1	1	0	0	0	0	0	0	Positive clinical trial results Cost effectiveness High demand from parents Health education and awareness campaigns Trust in healthcare providers Positive media coverage	1	0	1	1	1	0	0	1	1	399872223	1d319922-b686-4955-be2d-38050e08ffd2	2024-10-26 18:24:37
2024-10-26 11:24:37	2024-10-26 11:26:31	Female	Less than 20 years	Single	Bachelor's degree	Christianity	Nurse	Less than 1 year		Disagree	Agree	Disagree	Strongly disagree	Disagree	Agree	Agree	Disagree	Disagree	Agree	Agree	Disagree	Agree	Disagree	Agree	Lack of sufficient information about the vaccine Concerns about safety Cost of the vaccine Parental resistance Limited availability of the vaccine	1	1	0	1	1	0	1	0	0	Positive clinical trial results Cost effectiveness Health education and awareness campaigns Availability in local health facilities	1	0	1	0	1	0	1	0	0	399872524	a30425fe-9d64-4bc2-b9a8-fa87c4f47adb	2024-10-26 18:26:31
2024-10-26 11:26:31	2024-10-26 11:28:07	Female	21-30 years	Single	National Diploma	Christianity	Laboratory technician	1-5 years	No	Disagree	Agree	Agree	Agree	Agree	Agree	Agree	Agree	Agree	Agree	Agree	Agree	Agree	Agree	Agree	Lack of sufficient information about the vaccine	1	0	0	0	0	0	0	0	0	Positive clinical trial results Health education and awareness campaigns Availability in local health facilities Trust in healthcare providers Positive media coverage	1	0	0	0	1	0	1	1	1	399872841	8b3e9c7d-1d76-4655-b5aa-b5146d48d434	2024-10-26 18:28:08
2024-10-26 11:28:07	2024-10-26 11:30:02	Female	31-40 years	Married	National Diploma	Christianity	Nurse	Less than 1 year	No	Agree	Disagree	Disagree	Agree	Agree	Agree	Agree	Agree	Agree	Agree	Strongly agree	Strongly agree	Strongly agree	Agree	Agree	Lack of sufficient information about the vaccine Concerns about safety Concerns about effectively Cost of the vaccine Parental resistance Cultural beliefs and practices Limited availability of the vaccine Negative media reports	1	1	1	1	1	1	1	0	1	Positive clinical trial results Endorsement by health authorities Cost effectiveness High demand from parents Health education and awareness campaigns Government support and subsidies Availability in local health facilities Trust in healthcare providers Positive media coverage	1	1	1	1	1	1	1	1	1	399873193	c74f979b-7ba9-4c5d-9d35-27f2db76d94a	2024-10-26 18:30:03
2024-10-26 11:30:02	2024-10-26 11:31:54	Male	21-30 years	Single	Bachelor's degree	Christianity	Pediatric doctor	Less than 1 year	Yes	Strongly agree	Agree	Agree	Agree	Agree	Strongly agree	Agree	Agree	Agree	Agree	Strongly agree	Agree	Agree	Agree	Agree	Lack of sufficient information about the vaccine Concerns about safety Concerns about effectively Cost of the vaccine Limited availability of the vaccine	1	1	1	1	0	0	1	0	0	Positive clinical trial results Endorsement by health authorities Cost effectiveness Health education and awareness campaigns Government support and subsidies Availability in local health facilities Trust in healthcare providers Positive media coverage	1	1	1	0	1	1	1	1	1	399873556	f7f70145-44ed-4824-b8fd-8ab740ca4146	2024-10-26 18:31:54
2024-10-26 11:31:54	2024-10-26 11:33:50	Female	21-30 years	Married	Bachelor's degree	Christianity	Nurse	1-5 years	Yes	Agree	Agree	Agree	Disagree	Disagree	Disagree	Agree	Disagree	Agree	Agree	Agree	Disagree	Disagree	Agree	Strongly agree	Lack of sufficient information about the vaccine Concerns about safety Concerns about effectively Cost of the vaccine Parental resistance Cultural beliefs and practices Limited availability of the vaccine Lack of trust in healthcare providers Negative media reports	1	1	1	1	1	1	1	1	1	Positive clinical trial results Endorsement by health authorities Cost effectiveness Health education and awareness campaigns Government support and subsidies Availability in local health facilities Positive media coverage	1	1	1	0	1	1	1	0	1	399873881	4ae84e8f-026f-4dca-8607-b2596f32899d	2024-10-26 18:33:50
2024-10-26 11:33:51	2024-10-26 11:35:23	Male	21-30 years	Single	Bachelor's degree	Christianity	Nurse	Less than 1 year	No	Agree	Agree	Agree	Agree	Agree	Agree	Agree	Agree	Agree	Agree	Agree	Agree	Agree	Agree	Agree	Lack of sufficient information about the vaccine Concerns about safety Concerns about effectively Cost of the vaccine Cultural beliefs and practices Limited availability of the vaccine	1	1	1	1	0	1	1	0	0	Positive clinical trial results Endorsement by health authorities Cost effectiveness Government support and subsidies Availability in local health facilities Trust in healthcare providers Positive media coverage	1	1	1	0	0	1	1	1	1	399874159	529239fd-041c-43bc-b0ad-b653bb4bb8b3	2024-10-26 18:35:23
2024-10-26 11:35:23	2024-10-26 11:37:03	Female	21-30 years	Single	National Diploma	Christianity	Nurse		No	Agree	Agree	Agree	Agree	Agree	Agree	Agree	Agree	Agree	Agree	Agree	Agree	Agree	Agree	Agree	Lack of sufficient information about the vaccine Concerns about safety Concerns about effectively Cost of the vaccine Cultural beliefs and practices Limited availability of the vaccine	1	1	1	1	0	1	1	0	0	Positive clinical trial results Endorsement by health authorities Cost effectiveness Health education and awareness campaigns Government support and subsidies Availability in local health facilities Trust in healthcare providers Positive media coverage	1	1	1	0	1	1	1	1	1	399874474	44fb9f66-3dd9-46de-aa60-b612c66eb8c9	2024-10-26 18:37:03
2024-10-26 11:37:03	2024-10-26 11:39:20	Female	Less than 20 years	Single	National Diploma	Christianity	Nurse	Less than 1 year	No	Agree	Strongly agree	Strongly agree	Strongly agree	Strongly agree	Strongly agree	Strongly agree	Strongly agree	Strongly agree	Strongly agree	Strongly agree	Strongly agree	Strongly agree	Strongly agree		Concerns about effectively	0	0	1	0	0	0	0	0	0	Government support and subsidies	0	0	0	0	0	1	0	0	0	399874821	82db33d6-2b68-4383-b91f-bc04151880db	2024-10-26 18:39:20
2024-10-26 11:39:20	2024-10-26 11:41:26	Female	21-30 years	Single	National Diploma	Christianity	Nurse	Less than 1 year	Yes	Agree	Strongly agree	Agree	Agree	Agree	Agree	Agree	Agree	Agree	Strongly agree	Agree	Agree	Agree	Disagree	Agree	Lack of sufficient information about the vaccine Concerns about safety Concerns about effectively Cost of the vaccine Parental resistance Cultural beliefs and practices Limited availability of the vaccine Negative media reports	1	1	1	1	1	1	1	0	1	Positive clinical trial results Cost effectiveness Health education and awareness campaigns Government support and subsidies Availability in local health facilities Positive media coverage	1	0	1	0	1	1	1	0	1	399875112	9891984f-0b55-4000-b380-eeaaedf116b7	2024-10-26 18:41:28
2024-10-26 11:41:26	2024-10-26 11:44:45	Female	21-30 years	Single	National Diploma	Christianity	Nurse	1-5 years	Yes	Agree	Agree	Disagree	Agree	Agree	Agree	Agree		Agree	Agree																										399875894	94f51974-6a1d-4cd0-92c6-ed6300797056	2024-10-26 18:44:46
2024-10-26 11:44:45	2024-10-26 11:46:30	Female	21-30 years	Single	National Diploma	Christianity	Nurse	1-5 years	Yes	Strongly agree	Strongly agree	Agree	Agree	Agree	Agree	Agree	Agree	Agree	Agree	Agree	Agree	Agree	Agree	Agree	Lack of sufficient information about the vaccine Concerns about safety Concerns about effectively Cost of the vaccine Parental resistance Cultural beliefs and practices Limited availability of the vaccine Lack of trust in healthcare providers Negative media reports	1	1	1	1	1	1	1	1	1	Positive clinical trial results Cost effectiveness High demand from parents Government support and subsidies Availability in local health facilities Trust in healthcare providers Positive media coverage	1	0	1	1	0	1	1	1	1	399876163	63d96cea-fe58-48b3-a2be-297145ca726a	2024-10-26 18:46:30
2024-10-26 11:46:30	2024-10-26 11:49:21	Female	21-30 years	Single	National Diploma	Christianity	Nurse practitioner	Less than 1 year	No	Agree	Strongly agree	Agree	Agree	Agree	Agree	Agree	Agree	Agree	Agree	Disagree	Disagree	Agree	Disagree	Agree	Lack of sufficient information about the vaccine	1	0	0	0	0	0	0	0	0	Positive clinical trial results	1	0	0	0	0	0	0	0	0	399876610	d4cc393d-b2c5-47d0-bf03-1c66bb11450a	2024-10-26 18:49:22
2024-10-26 11:49:22	2024-10-26 11:53:57	Female	Less than 20 years	Single	National Diploma	Christianity	Nurse	Less than 1 year	No	Agree	Agree	Agree	Agree	Strongly agree	Agree	Strongly agree	Agree	Strongly agree	Agree	Agree	Agree	Agree	Agree	Strongly agree	Lack of sufficient information about the vaccine Concerns about effectively Cultural beliefs and practices Lack of trust in healthcare providers Negative media reports	1	0	1	0	0	1	0	1	1	Positive clinical trial results Endorsement by health authorities Health education and awareness campaigns Availability in local health facilities Trust in healthcare providers Positive media coverage	1	1	0	0	1	0	1	1	1	399877414	d5cc27c4-1bbb-4448-b058-87c4a6b41e98	2024-10-26 18:53:57
2024-10-26 11:53:58	2024-10-26 11:56:47	Male	31-40 years	Married	Bachelor's degree		Pharmacist	6-10 years	Yes	Strongly agree	Agree	Agree	Agree	Agree	Agree	Agree	Agree	Agree	Agree	Agree	Agree	Agree	Agree	Agree	Lack of sufficient information about the vaccine Concerns about effectively Parental resistance Negative media reports	1	0	1	0	1	0	0	0	1	Positive clinical trial results Cost effectiveness Health education and awareness campaigns Government support and subsidies Positive media coverage	1	0	1	0	1	1	0	0	1	399878117	5d447b56-330a-4163-8f02-725a81c914a0	2024-10-26 18:56:52
2024-10-26 11:56:47	2024-10-26 12:00:59	Female	31-40 years	Single		Christianity	Nurse practitioner	1-5 years	Yes	Strongly agree	Strongly agree	Agree	Agree	Strongly agree	Strongly agree	Strongly disagree	Strongly agree	Agree	Strongly agree	Agree	Agree	Agree	Strongly disagree	Agree	Concerns about effectively	0	0	1	0	0	0	0	0	0	Government support and subsidies	0	0	0	0	0	1	0	0	0	399878810	aab9bf5c-6fbd-4215-b5d8-78e2e9b7e239	2024-10-26 19:01:01
2024-10-26 12:00:59	2024-10-26 12:09:09	Female	31-40 years	Single		Christianity	Nurse practitioner	1-5 years	Yes	Strongly agree	Strongly agree	Agree	Agree	Strongly agree	Strongly disagree	Strongly agree	Agree	Agree	Strongly agree	Agree	Agree	Agree	Strongly disagree	Agree	Concerns about effectively	0	0	1	0	0	0	0	0	0	Government support and subsidies	0	0	0	0	0	1	0	0	0	399880621	efb286af-f401-4b1a-8da8-8f04d0023865	2024-10-26 19:09:49
2024-10-26 12:09:09	2024-10-26 12:11:17	Female	31-40 years	Single		Christianity	Nurse practitioner	1-5 years	Yes	Strongly agree	Strongly agree	Agree	Agree	Strongly agree	Strongly agree	Strongly disagree	Strongly agree	Agree	Strongly agree	Agree	Agree	Agree	Strongly disagree	Agree	Concerns about effectively	0	0	1	0	0	0	0	0	0	Government support and subsidies	0	0	0	0	0	1	0	0	0	399880916	4426886c-c7f1-43f7-a895-5369aa7a6d15	2024-10-26 19:11:33
2024-10-26 12:11:17	2024-10-26 12:13:30	Female	31-40 years	Single		Christianity	Nurse practitioner	1-5 years	Yes	Strongly agree	Strongly agree	Agree	Agree	Strongly agree	Strongly agree	Strongly disagree	Strongly agree	Agree	Strongly agree	Agree	Agree	Agree	Strongly disagree	Agree	Concerns about effectively	0	0	1	0	0	0	0	0	0	Government support and subsidies	0	0	0	0	0	1	0	0	0	399881202	9d4dcefd-72f2-4c83-a803-cd044ce26176	2024-10-26 19:13:33
2024-10-26 12:13:31	2024-10-26 12:16:19	Female	31-40 years	Single		Christianity	Nurse practitioner	1-5 years	Yes	Strongly agree	Strongly agree	Agree	Agree	Strongly agree	Strongly agree	Strongly disagree	Strongly agree	Agree	Strongly agree	Agree	Agree		Strongly disagree	Agree	Concerns about effectively	0	0	1	0	0	0	0	0	0	Government support and subsidies	0	0	0	0	0	1	0	0	0	399881721	b7a7983e-612a-4e13-bc48-0b0f6575b957	2024-10-26 19:16:22
2024-10-26 12:16:20	2024-10-26 12:20:31	Male	41-50 years	Married	Master's degree	Christianity	Pediatric doctor	11-15 years	Yes	Strongly agree	Agree		Agree	Agree	Agree		Agree	Agree	Agree	Agree	Agree	Agree	Agree	Agree	Lack of sufficient information about the vaccine Parental resistance Cultural beliefs and practices	1	0	0	0	1	1	0	0	0	Government support and subsidies Positive media coverage	0	0	0	0	0	1	0	0	1	399882392	494b9166-8759-47d9-99cb-4f3631d309bf	2024-10-26 19:20:36
2024-10-26 12:20:31	2024-10-26 12:22:44	Female	31-40 years	Married	Bachelor's degree	Christianity	Nurse	6-10 years	Yes	Strongly agree	Strongly agree		Agree		Agree	Agree		Agree	Strongly agree	Agree	Agree		Strongly disagree	Agree	Concerns about effectively Parental resistance	0	0	1	0	1	0	0	0	0	Government support and subsidies Positive media coverage	0	0	0	0	0	1	0	0	1	399882749	31b4b35a-8ac8-4e35-b846-89ed494296c9	2024-10-26 19:22:44
2024-10-26 12:22:44	2024-10-26 12:24:21	Male	21-30 years	Single	Bachelor's degree	Christianity	Pharmacist	Less than 1 year	No	Agree	Agree	Disagree	Agree	Agree	Agree	Agree	Agree	Agree	Agree	Disagree	Disagree	Disagree	Disagree	Agree	Lack of sufficient information about the vaccine Concerns about safety Concerns about effectively Cost of the vaccine Parental resistance Cultural beliefs and practices Limited availability of the vaccine Lack of trust in healthcare providers Negative media reports	1	1	1	1	1	1	1	1	1	Positive clinical trial results Endorsement by health authorities Cost effectiveness High demand from parents Health education and awareness campaigns Government support and subsidies Availability in local health facilities Trust in healthcare providers Positive media coverage	1	1	1	1	1	1	1	1	1	399883058	d4dbfcac-c45b-4962-99f8-850d8db09667	2024-10-26 19:24:23
2024-10-26 12:24:21	2024-10-26 12:26:07	Female	21-30 years	Married	Bachelor's degree	Christianity	Pharmacist	Less than 1 year	No	Agree	Disagree	Agree	Agree	Agree	Strongly agree	Agree	Agree	Agree	Agree	Agree	Agree	Agree	Agree	Agree	Cost of the vaccine Parental resistance Limited availability of the vaccine Negative media reports	0	0	0	1	1	0	1	0	1	Positive clinical trial results Endorsement by health authorities Cost effectiveness Health education and awareness campaigns Availability in local health facilities Trust in healthcare providers Positive media coverage	1	1	1	0	1	0	1	1	1	399883313	4446f27e-8cad-44a8-ac3b-dd53a13a46ad	2024-10-26 19:26:08
2024-10-26 12:26:08	2024-10-26 12:27:51	Female	21-30 years	Single	Bachelor's degree	Christianity	Pharmacist	Less than 1 year	Yes	Agree	Agree	Agree	Agree	Agree	Agree	Agree	Disagree	Agree	Agree	Disagree	Disagree	Disagree	Disagree	Agree	Lack of sufficient information about the vaccine Concerns about safety Concerns about effectively Cost of the vaccine Parental resistance Limited availability of the vaccine Lack of trust in healthcare providers Negative media reports	1	1	1	1	1	0	1	1	1	Positive clinical trial results Endorsement by health authorities Cost effectiveness Health education and awareness campaigns Government support and subsidies Availability in local health facilities Trust in healthcare providers Positive media coverage	1	1	1	0	1	1	1	1	1	399883628	efa9d706-ee61-4ad3-8210-227e5fd31ac1	2024-10-26 19:27:51
2024-10-26 12:27:51	2024-10-26 12:29:34	Male	21-30 years	Single	Bachelor's degree	Christianity	Pharmacist	Less than 1 year	No	Agree	Agree	Agree	Agree	Agree	Agree	Agree	Agree	Agree	Agree	Disagree	Disagree	Agree	Disagree	Strongly agree	Lack of sufficient information about the vaccine	1	0	0	0	0	0	0	0	0	Positive clinical trial results	1	0	0	0	0	0	0	0	0	399883855	ee2b8dda-30be-4184-a04e-8bf9e24dda14	2024-10-26 19:29:34
2024-10-26 12:29:34	2024-10-26 12:32:10	Female	31-40 years	Married	National Diploma	Christianity	Laboratory technician	6-10 years	Yes	Strongly agree	Agree	Agree	Agree	Agree	Agree	Agree	Agree	Agree	Agree		Agree		Agree	Agree	Cultural beliefs and practices	0	0	0	0	0	1	0	0	0	Health education and awareness campaigns	0	0	0	0	1	0	0	0	0	399884184	ea029193-3007-48ae-b945-0437ce4b55e6	2024-10-26 19:32:11
2024-10-26 12:32:10	2024-10-26 12:34:19	Male	41-50 years	Married	Master's degree	Christianity	Pediatric doctor	11-15 years	Yes	Strongly agree	Agree	Agree	Agree	Agree	Agree	Agree	Agree	Agree	Agree	Agree	Agree		Agree	Agree	Cultural beliefs and practices	0	0	0	0	0	1	0	0	0	Health education and awareness campaigns	0	0	0	0	1	0	0	0	0	399884516	965a46d6-0271-4492-bb81-6eb2312b9119	2024-10-26 19:34:21
2024-10-26 12:34:19	2024-10-26 12:36:56	Female	21-30 years	Single		Christianity	Others	Less than 1 year	Yes	Strongly agree	Agree	Agree		Agree	Strongly agree	Agree	Strongly agree	Agree	Disagree	Agree	Agree	Agree	Agree	Agree	Lack of sufficient information about the vaccine Concerns about safety Parental resistance Lack of trust in healthcare providers	1	1	0	0	1	0	0	1	0	Health education and awareness campaigns Government support and subsidies Trust in healthcare providers	0	0	0	0	1	1	0	1	0	399884862	e4bd62f3-3f92-426b-9f03-d1d54aa369e6	2024-10-26 19:36:56
2024-10-26 12:36:56	2024-10-26 12:38:53	Female	31-40 years	Married		Christianity	Others	Less than 1 year	Yes	Agree	Agree	Agree	Agree	Agree	Agree	Agree	Agree	Agree	Agree	Agree	Agree	Agree	Agree	Agree	Lack of sufficient information about the vaccine Cultural beliefs and practices	1	0	0	0	0	1	0	0	0	Endorsement by health authorities High demand from parents Health education and awareness campaigns Availability in local health facilities Trust in healthcare providers Positive media coverage	0	1	0	1	1	0	1	1	1	399885192	073be840-8779-4106-a171-5ec4aef169f2	2024-10-26 19:38:55
2024-10-26 12:38:53	2024-10-26 12:40:56	Female	31-40 years	Single	Bachelor's degree	Christianity	Public Health practitioner	1-5 years	Yes	Agree	Disagree	Disagree	Agree	Agree	Agree	Agree	Agree	Disagree	Agree	Agree	Agree	Agree	Agree	Agree	Lack of sufficient information about the vaccine	1	0	0	0	0	0	0	0	0	Positive clinical trial results	1	0	0	0	0	0	0	0	0	399885501	8ae4a3ae-563b-4e75-aab7-36cc788846c8	2024-10-26 19:40:57
2024-10-26 12:40:56	2024-10-26 12:43:01	Male	31-40 years	Separated	National Diploma	Christianity	Others		Yes	Agree	Agree	Agree	Agree	Agree	Agree	Agree	Agree	Agree	Disagree	Agree	Agree	Agree	Agree	Agree	Lack of sufficient information about the vaccine	1	0	0	0	0	0	0	0	0	Positive clinical trial results	1	0	0	0	0	0	0	0	0	399885888	1c6c29bf-933c-43c6-b371-fb4e800af5d7	2024-10-26 19:43:01
2024-10-26 12:43:02	2024-10-26 12:46:05	Female	21-30 years	Married	Doctoral degree	Christianity	Nurse	1-5 years	Yes	Strongly agree	Strongly agree	Agree	Agree	Strongly agree	Strongly agree	Strongly disagree	Strongly agree	Agree	Strongly agree	Agree	Agree	Strongly disagree	Agree		Concerns about effectively	0	0	1	0	0	0	0	0	0	Government support and subsidies	0	0	0	0	0	1	0	0	0	399886364	bd948420-432c-4a74-8dfd-6054dc7e0892	2024-10-26 19:46:05
2024-10-26 12:46:05	2024-10-26 12:47:38	Female	41-50 years	Married	Master's degree		Nurse practitioner	11-15 years	Yes	Strongly agree	Agree	Agree	Agree	Agree	Agree	Agree	Agree	Agree	Agree	Agree		Agree		Agree	Lack of sufficient information about the vaccine Parental resistance Negative media reports	1	0	0	0	1	0	0	0	1	Positive clinical trial results Health education and awareness campaigns Government support and subsidies Positive media coverage	1	0	0	0	1	1	0	0	1	399886746	365a2f03-aa93-453b-aed2-ac5ba1f92aba	2024-10-26 19:47:39
2024-10-26 12:47:38	2024-10-26 12:49:25	Male	31-40 years	Single	Master's degree	Christianity	Laboratory technician	6-10 years	Yes	Strongly agree	Agree	Agree	Agree	Agree	Agree		Strongly agree	Agree	Agree	Agree	Agree	Agree	Agree	Agree	Lack of sufficient information about the vaccine Parental resistance Lack of trust in healthcare providers	1	0	0	0	1	0	0	1	0	High demand from parents Health education and awareness campaigns Government support and subsidies Trust in healthcare providers Positive media coverage	0	0	0	1	1	1	0	1	1	399887055	0d85b876-6357-4997-876a-249d8cbead80	2024-10-26 19:49:25
2024-10-26 12:49:25	2024-10-26 12:51:31	Female	31-40 years	Married	National Diploma	Christianity	Laboratory technician	6-10 years	Yes	Strongly agree	Agree	Agree	Agree	Agree	Agree	Agree	Agree	Agree	Agree	Agree	Agree	Agree	Agree	Agree	Lack of sufficient information about the vaccine Cost of the vaccine Parental resistance Negative media reports	1	0	0	1	1	0	0	0	1	Endorsement by health authorities High demand from parents Health education and awareness campaigns Government support and subsidies Positive media coverage	0	1	0	1	1	1	0	0	1	399887407	736b06c4-e579-46a1-b9ba-ae550b38bb61	2024-10-26 19:51:31
2024-10-26 12:51:31	2024-10-26 12:53:26	Male	41-50 years	Married	Master's degree	Christianity	Pediatric doctor	11-15 years	Yes	Strongly agree	Agree	Agree	Agree	Agree	Agree	Agree	Agree	Agree	Agree	Agree	Agree	Agree	Agree	Agree	Lack of sufficient information about the vaccine Concerns about safety Concerns about effectively Cultural beliefs and practices	1	1	1	0	0	1	0	0	0	Positive clinical trial results Endorsement by health authorities Health education and awareness campaigns Government support and subsidies Positive media coverage	1	1	0	0	1	1	0	0	1	399887701	aa40207b-a4c4-4972-a05e-3acdf37dd817	2024-10-26 19:53:27
[truncated: 5 more columns]
