# Supplementary material
Source: Research Square preprint supplement (doi:10.21203/rs.3.rs-9012196/v1)
Supplement: Supplementary file 2 [file 8557e3ad1f4aef50248d38cc.xlsx]

## Sheet: PERCEIVED SAFETY, EFFECTIVEN...
start	end	Gender	Age	Marital status	Educational attainment	Religion	Occupation	Relationship with the child	Number of children	Are you aware of the R21-MATRIX-M MALARIA vaccine?	I believe the R21-MATRIX-M MALARIA vaccine is safe for children	I am concerned about potential side effects of the R21-MATRIX-M MALARIA vaccine	I have confidence in the clinical trials conducted for the R21-MATRIX-M MALARIA vaccine	I believe the benefits of the R21-MATRIX-M MALARIA vaccine outweighs it's risk	I trust the safety information provided by health authorities regarding the R21-MATRIX-M MALARIA vaccine	I believe the R21-MATRIX-M MALARIA vaccine is effective in preventing MALARIA in children	I think the R21-MATRIX-M MALARIA vaccine will reduce the incidence of MALARIA in our community	I trust the effectiveness data presented in the research studies on the R21-MATRIX-M MALARIA vaccine	I believe the R21-MATRIX-M MALARIA vaccine will have a long lasting impact on malaria eradication	I believe the R21-MATRIX-M MALARIA vaccine will help in the reduction of morbidity and mortality associated with malaria	I am willing to recommend the R21-MATRIX-M MALARIA vaccine to other parents for their children	I would be willing to have my own children vaccinated with the R21-MATRIX-M MALARIA vaccine	I believe parents in my community will accept the R21-MATRIX-M MALARIA vaccine for their children	I think the availability of the R21-MATRIX-M MALARIA vaccine in local health facilities is important	What barriers do you foresee in recommending the R21-MATRIX-M MALARIA vaccine	What barriers do you foresee in recommending the R21-MATRIX-M MALARIA vaccine /Lack of sufficient information about the vaccine	What barriers do you foresee in recommending the R21-MATRIX-M MALARIA vaccine /Concerns about safety	What barriers do you foresee in recommending the R21-MATRIX-M MALARIA vaccine /Concerns about effectiveness	What barriers do you foresee in recommending the R21-MATRIX-M MALARIA vaccine /Cost of the vaccine	What barriers do you foresee in recommending the R21-MATRIX-M MALARIA vaccine /Parental resistance	What barriers do you foresee in recommending the R21-MATRIX-M MALARIA vaccine /Cultural beliefs and practices	What barriers do you foresee in recommending the R21-MATRIX-M MALARIA vaccine /Limited availability of the vaccine	What barriers do you foresee in recommending the R21-MATRIX-M MALARIA vaccine /Lack of trust in healthcare providers	What barriers do you foresee in recommending the R21-MATRIX-M MALARIA vaccine /Negative media reports	What factors would encourage you to recommend the R21-MATRIX-M MALARIA vaccine?	What factors would encourage you to recommend the R21-MATRIX-M MALARIA vaccine?/Positive clinical trial results	What factors would encourage you to recommend the R21-MATRIX-M MALARIA vaccine?/Endorsement by health authorities	What factors would encourage you to recommend the R21-MATRIX-M MALARIA vaccine?/Cost effectiveness	What factors would encourage you to recommend the R21-MATRIX-M MALARIA vaccine?/High demand from parents	What factors would encourage you to recommend the R21-MATRIX-M MALARIA vaccine?/Health education and awareness campaigns	What factors would encourage you to recommend the R21-MATRIX-M MALARIA vaccine?/Government support and subsidies	What factors would encourage you to recommend the R21-MATRIX-M MALARIA vaccine?/Availability in local health facilities	What factors would encourage you to recommend the R21-MATRIX-M MALARIA vaccine?/Trust in healthcare providers	What factors would encourage you to recommend the R21-MATRIX-M MALARIA vaccine?/Positive media coverage	_id	_uuid	_submission_time	_validation_status	_notes
2024-12-26 09:26:20	2024-12-26 09:27:57	Male	31-40 years	Married	Tertiary	Christianity	Non healthcare sector	Parent	1	Yes	Disagree	Disagree	Agree	Agree	Agree	Strongly disagree	Disagree	Disagree	Agree	Agree	Disagree	Agree	Agree	Agree	Lack of sufficient information about the vaccine	1	0	0	0	0	0	0	0	0	Endorsement by health authorities	0	1	0	0	0	0	0	0	0	424345352	f4401c94-52a3-49d7-a7fe-8ae23c85b858	2024-12-26 08:28:15
2024-12-26 09:33:17	2024-12-26 09:34:32	Female	31-40 years	Married	Tertiary	Christianity	Non healthcare sector		1	No															Lack of sufficient information about the vaccine	1	0	0	0	0	0	0	0	0	Health education and awareness campaigns	0	0	0	0	1	0	0	0	0	424347024	aec90091-efda-497e-8f66-ee89bf37431b	2024-12-26 08:34:33
2024-12-26 09:34:32	2024-12-26 09:35:44	Female	21-30 years	Married	Primary	Christianity	Non healthcare sector	Parent	3	No																																			424347317	70755e9e-1d35-4752-99b9-67689b0bdeb4	2024-12-26 08:35:46
2024-12-26 09:35:44	2024-12-26 09:37:21	Female	31-40 years	Married	Tertiary	Christianity	Non healthcare sector	Parent	2	No	Disagree	Agree	Disagree	Disagree	Agree	Disagree	Agree	Agree	Disagree	Disagree	Disagree	Disagree	Disagree	Agree	Cultural beliefs and practices	0	0	0	0	0	1	0	0	0	Endorsement by health authorities	0	1	0	0	0	0	0	0	0	424347776	9e1fc4b4-82d6-4f33-ab20-4bb8ed250ff8	2024-12-26 08:37:21
2024-12-26 09:37:21	2024-12-26 09:39:08	Male	21-30 years	Married	Tertiary	Christianity	Non healthcare sector	Parent	2	No	Agree		Disagree	Agree	Agree	Disagree	Agree	Agree	Disagree	Agree	Agree	Agree	Agree	Strongly agree	Lack of sufficient information about the vaccine Concerns about safety Concerns about effectiveness Cost of the vaccine Limited availability of the vaccine Lack of trust in healthcare providers	1	1	1	1	0	0	1	1	0	Endorsement by health authorities Cost effectiveness Health education and awareness campaigns Availability in local health facilities Trust in healthcare providers	0	1	1	0	1	0	1	1	0	424348323	8455a2eb-0d94-40e9-80ce-f48001c3b10d	2024-12-26 08:39:10
2024-12-26 09:39:08	2024-12-26 09:41:06	Female	31-40 years	Married	Tertiary	Christianity	Non healthcare sector	Parent	1	Yes	Strongly agree	Agree	Agree	Agree	Strongly agree	Strongly agree	Strongly agree	Strongly agree	Strongly agree	Strongly agree	Strongly agree	Strongly agree	Strongly agree	Strongly agree	Lack of sufficient information about the vaccine Concerns about safety Concerns about effectiveness Cost of the vaccine Parental resistance Cultural beliefs and practices Limited availability of the vaccine Lack of trust in healthcare providers	1	1	1	1	1	1	1	1	0	Positive clinical trial results Endorsement by health authorities Cost effectiveness High demand from parents Health education and awareness campaigns Government support and subsidies Availability in local health facilities Trust in healthcare providers Positive media coverage	1	1	1	1	1	1	1	1	1	424348841	dbc108cf-9d91-4141-a89c-c1edbe927c47	2024-12-26 08:41:06
2024-12-26 09:41:06	2024-12-26 09:42:29	Female	31-40 years	Married	Tertiary	Christianity	Non healthcare sector	Parent	1	Yes	Strongly agree	Disagree	Agree	Agree		Strongly agree	Strongly agree	Agree	Strongly agree	Strongly agree	Strongly agree	Strongly agree	Strongly agree	Strongly agree	Lack of sufficient information about the vaccine Parental resistance	1	0	0	0	1	0	0	0	0	Positive clinical trial results Cost effectiveness Health education and awareness campaigns Availability in local health facilities	1	0	1	0	1	0	1	0	0	424349156	7c85fd14-214f-4282-bf7b-365c01ffce2e	2024-12-26 08:42:29
2024-12-26 09:42:29	2024-12-26 09:43:57	Male	21-30 years	Married	Tertiary	Christianity	Unemployed	Parent	2	Yes	Agree	Agree	Agree	Agree	Agree	Agree	Agree	Agree	Agree	Agree	Agree	Agree	Agree		Cost of the vaccine Parental resistance Lack of trust in healthcare providers Negative media reports	0	0	0	1	1	0	0	1	1	Positive clinical trial results Cost effectiveness Availability in local health facilities Trust in healthcare providers Positive media coverage	1	0	1	0	0	0	1	1	1	424349510	f5c10c67-635f-4cdc-80f4-7cf273a2bd86	2024-12-26 08:43:59
2024-12-26 09:43:57	2024-12-26 09:45:19	Female	Less than 20 years	Married	Secondary	Christianity	Student	Parent	1	No	Disagree	Agree	Agree	Agree	Agree	Agree	Agree	Disagree	Agree	Agree	Agree	Agree	Agree	Agree	Lack of sufficient information about the vaccine Negative media reports	1	0	0	0	0	0	0	0	1	Positive clinical trial results Cost effectiveness	1	0	1	0	0	0	0	0	0	424349828	6c225d7a-b6bf-44bb-99d0-5163827fef90	2024-12-26 08:45:19
2024-12-26 09:45:19	2024-12-26 09:47:08	Female	31-40 years	Married	Tertiary	Christianity	Unemployed	Parent	3	Yes	Agree	Disagree	Agree	Agree	Agree	Agree	Strongly agree	Agree	Strongly agree	Strongly agree	Agree	Strongly agree	Strongly agree	Strongly agree	Lack of sufficient information about the vaccine Concerns about safety Lack of trust in healthcare providers Negative media reports	1	1	0	0	0	0	0	1	1	Positive clinical trial results Endorsement by health authorities Cost effectiveness High demand from parents Health education and awareness campaigns Government support and subsidies Availability in local health facilities Trust in healthcare providers Positive media coverage	1	1	1	1	1	1	1	1	1	424350215	ec4c77b4-18e8-49fe-a67a-5482aafc14d7	2024-12-26 08:47:08
2024-12-26 09:47:08	2024-12-26 09:48:47	Female	31-40 years	Married	Tertiary	Christianity	Unemployed	Parent	1	No	Agree	Agree		Agree			Agree		Agree					Agree	Lack of sufficient information about the vaccine Concerns about safety Concerns about effectiveness Cost of the vaccine Parental resistance Cultural beliefs and practices Limited availability of the vaccine Lack of trust in healthcare providers Negative media reports	1	1	1	1	1	1	1	1	1	Positive clinical trial results Endorsement by health authorities Cost effectiveness Health education and awareness campaigns Availability in local health facilities Trust in healthcare providers Positive media coverage	1	1	1	0	1	0	1	1	1	424350698	0bbe9490-9391-4053-a2e2-1049511bb4e5	2024-12-26 08:48:47
2024-12-26 09:48:47	2024-12-26 09:50:14	Female	21-30 years	Married	Secondary	Christianity	Non healthcare sector	Parent	3	Yes		Disagree	Agree		Agree	Agree	Agree		Agree	Agree		Strongly disagree		Agree	Lack of sufficient information about the vaccine Concerns about safety Concerns about effectiveness Cost of the vaccine Cultural beliefs and practices	1	1	1	1	0	1	0	0	0	Positive clinical trial results Endorsement by health authorities	1	1	0	0	0	0	0	0	0	424351075	23f89733-a751-4512-91e8-342c24e332df	2024-12-26 08:50:18
2024-12-26 09:50:14	2024-12-26 09:51:20	Female	31-40 years	Married	Tertiary	Christianity	Non healthcare sector	Parent	1	No		Disagree				Agree	Agree		Agree		Agree																								424351371	3b8e3267-9373-400f-8deb-d0e9626ce015	2024-12-26 08:51:20
2024-12-26 09:51:20	2024-12-26 09:52:35	Female	21-30 years	Married	Secondary	Christianity	Non healthcare sector	Parent	2	No												Disagree	Disagree		Lack of sufficient information about the vaccine Concerns about safety Negative media reports	1	1	0	0	0	0	0	0	1	Positive clinical trial results Endorsement by health authorities Health education and awareness campaigns Positive media coverage	1	1	0	0	1	0	0	0	1	424351800	509951ae-2f46-4542-944b-9d4a07c8853b	2024-12-26 08:52:35
2024-12-26 09:52:36	2024-12-26 09:54:06	Female	21-30 years	Married	Secondary	Christianity	Non healthcare sector	Parent	1	No	Agree	Agree		Agree	Agree		Agree	Agree		Agree	Agree	Disagree	Agree		Lack of sufficient information about the vaccine Concerns about safety Concerns about effectiveness Cost of the vaccine Limited availability of the vaccine Negative media reports	1	1	1	1	0	0	1	0	1	Positive clinical trial results Endorsement by health authorities Health education and awareness campaigns Availability in local health facilities Positive media coverage	1	1	0	0	1	0	1	0	1	424352253	da3c6627-8a1d-4426-8684-5c075b2fe4a9	2024-12-26 08:54:06
2024-12-26 09:54:07	2024-12-26 09:55:58	Female	21-30 years	Single	Secondary	Christianity	Unemployed		1	Yes	Strongly agree	Strongly agree	Agree		Strongly agree	Strongly agree	Strongly agree	Strongly agree	Strongly agree	Strongly agree	Agree	Agree	Agree	Agree	Lack of sufficient information about the vaccine Cost of the vaccine Cultural beliefs and practices Lack of trust in healthcare providers Negative media reports	1	0	0	1	0	1	0	1	1	Positive clinical trial results Cost effectiveness High demand from parents Availability in local health facilities Trust in healthcare providers Positive media coverage	1	0	1	1	0	0	1	1	1	424352904	6a3954fa-f832-48f9-9f47-d86ab7fc51c3	2024-12-26 08:56:04
2024-12-26 09:55:58	2024-12-26 09:57:16	Female	31-40 years	Married		Christianity	Unemployed	Parent	2	No	Agree	Agree	Agree	Agree	Agree	Agree	Agree	Agree	Agree	Agree	Agree	Agree	Agree	Agree	Lack of sufficient information about the vaccine Concerns about safety Parental resistance Cultural beliefs and practices Lack of trust in healthcare providers Negative media reports	1	1	0	0	1	1	0	1	1	Positive clinical trial results Endorsement by health authorities Cost effectiveness High demand from parents Health education and awareness campaigns Government support and subsidies Availability in local health facilities Trust in healthcare providers Positive media coverage	1	1	1	1	1	1	1	1	1	424353193	7e0a81ad-1c93-4266-8db6-d3c1dd50527c	2024-12-26 08:57:16
2024-12-26 09:57:16	2024-12-26 09:58:33	Female	31-40 years	Married	Tertiary	Christianity	Unemployed	Parent	5 and above	Yes	Agree	Agree	Agree	Agree	Agree	Agree	Agree	Agree	Agree	Agree	Agree	Agree	Agree	Agree	Lack of sufficient information about the vaccine Concerns about safety Cost of the vaccine Parental resistance Cultural beliefs and practices Limited availability of the vaccine Lack of trust in healthcare providers Negative media reports	1	1	0	1	1	1	1	1	1											424353571	c836150a-3413-4827-b90d-cac244c36264	2024-12-26 08:58:34
2024-12-26 09:58:34	2024-12-26 09:59:57	Female	31-40 years	Married	Tertiary	Christianity	Non healthcare sector	Parent	2	Yes	Agree	Agree	Agree	Strongly agree	Strongly disagree	Disagree	Strongly agree	Agree	Disagree	Agree	Agree	Agree	Agree	Agree	Lack of sufficient information about the vaccine	1	0	0	0	0	0	0	0	0											424353997	7b7724fb-bc41-4e44-8d46-e979ca12e7e3	2024-12-26 08:59:59
2024-12-26 09:59:57	2024-12-26 10:01:14	Female	41-50 years	Married	Tertiary	Christianity	Non healthcare sector	Parent	4	No	Disagree	Disagree	Disagree	Disagree		Agree	Agree	Agree	Agree	Agree	Disagree	Disagree	Disagree	Disagree	Concerns about safety	0	1	0	0	0	0	0	0	0	Cost effectiveness	0	0	1	0	0	0	0	0	0	424354452	aafbd779-ef20-460d-9275-8baffad74894	2024-12-26 09:01:16
2024-12-26 10:01:14	2024-12-26 10:02:38	Female	21-30 years	Single	Secondary	Christianity	Non healthcare sector	Guardian		No	Disagree	Agree	Disagree	Disagree	Disagree	Agree	Agree	Disagree	Disagree	Agree	Disagree	Disagree	Disagree	Agree	Lack of sufficient information about the vaccine Concerns about safety Lack of trust in healthcare providers Negative media reports	1	1	0	0	0	0	0	1	1	Positive clinical trial results Health education and awareness campaigns Positive media coverage	1	0	0	0	1	0	0	0	1	424354835	f0a33452-6f6d-4fe0-916e-e9b124a715f8	2024-12-26 09:02:41
2024-12-26 10:02:38	2024-12-26 10:05:13	Male	31-40 years	Married	Tertiary	Christianity	Non healthcare sector	Grandparent	5 and above	Yes	Agree	Agree	Agree	Agree	Agree	Agree	Agree	Agree	Agree	Agree	Agree	Agree	Agree	Agree	Concerns about safety	0	1	0	0	0	0	0	0	0	Endorsement by health authorities	0	1	0	0	0	0	0	0	0	424355442	90fb1c57-ab16-4877-98b3-439d1177b78e	2024-12-26 09:05:13
2024-12-26 10:05:14	2024-12-26 10:06:57	Female	21-30 years	Married	Tertiary	Christianity	Student	Parent	2	Yes	Agree	Agree	Agree	Agree	Agree	Agree	Agree	Agree	Disagree	Agree	Agree	Agree	Agree	Agree	Limited availability of the vaccine	0	0	0	0	0	0	1	0	0	Positive clinical trial results	1	0	0	0	0	0	0	0	0	424355796	90fad53f-6b6f-4d13-a9af-cd20377ad3a9	2024-12-26 09:06:56
2024-12-26 10:06:57	2024-12-26 10:08:10	Male	21-30 years	Married	Tertiary	Christianity	Student	Parent	1	No	Agree	Agree	Disagree	Agree	Agree	Agree	Agree	Agree	Agree	Agree	Strongly agree	Agree	Agree	Strongly agree	Parental resistance	0	0	0	0	1	0	0	0	0	Health education and awareness campaigns	0	0	0	0	1	0	0	0	0	424356189	584dc70a-4e9e-456a-a9b4-1e9978a2dba9	2024-12-26 09:08:10
2024-12-26 10:08:10	2024-12-26 10:09:26	Female	21-30 years	Married	Secondary	Christianity	Unemployed	Parent	3	Yes	Agree	Agree	Strongly agree	Strongly agree	Strongly agree	Strongly agree	Strongly agree	Strongly agree	Strongly agree	Strongly agree	Strongly agree	Strongly agree	Strongly agree	Strongly agree	Lack of sufficient information about the vaccine Concerns about safety Concerns about effectiveness Cultural beliefs and practices	1	1	1	0	0	1	0	0	0	Positive clinical trial results Cost effectiveness High demand from parents Health education and awareness campaigns Availability in local health facilities	1	0	1	1	1	0	1	0	0	424356651	507021ad-7cb2-4da6-9ec4-7093db0a5ef2	2024-12-26 09:09:26
2024-12-26 10:19:23	2024-12-26 10:20:33	Female	21-30 years	Married	Secondary	Christianity	Unemployed	Parent	1	Yes	Disagree	Agree		Agree	Agree	Agree	Agree	Agree	Agree	Agree	Agree	Agree	Agree	Agree	Concerns about safety Lack of trust in healthcare providers	0	1	0	0	0	0	0	1	0	Health education and awareness campaigns	0	0	0	0	1	0	0	0	0	424360064	8c2cdefe-332d-4671-b433-2131259a24e2	2024-12-26 09:20:34
2024-12-26 10:20:34	2024-12-26 10:21:42		21-30 years	Married	Tertiary	Christianity	Healthcare sector	Parent	3	No	Disagree	Disagree	Disagree	Disagree	Disagree	Strongly disagree	Strongly disagree	Strongly disagree	Strongly disagree	Strongly disagree	Strongly disagree	Strongly disagree	Strongly disagree	Strongly disagree																					424360355	93191a78-1651-4fd1-a36c-4b7f0fe3c76d	2024-12-26 09:21:44
2024-12-26 10:21:43	2024-12-26 10:23:01	Female	21-30 years	Married	Tertiary	Christianity	Healthcare sector	Parent	1	No	Agree	Agree	Agree	Agree	Agree	Agree	Agree	Agree	Agree	Agree	Agree	Agree	Agree	Agree	Lack of sufficient information about the vaccine Parental resistance Negative media reports	1	0	0	0	1	0	0	0	1	Positive clinical trial results Endorsement by health authorities High demand from parents Availability in local health facilities Positive media coverage	1	1	0	1	0	0	1	0	1	424360660	c55af9f9-433f-4098-a0b3-f4aea9d8b0ec	2024-12-26 09:23:02
2024-12-26 10:23:01	2024-12-26 10:24:21	Female	21-30 years	Married	Tertiary	Christianity	Non healthcare sector	Parent	1	No	Disagree	Strongly agree	Disagree	Agree	Disagree	Agree	Agree	Disagree	Agree	Agree	Disagree	Disagree	Agree	Agree	Lack of sufficient information about the vaccine Concerns about safety Concerns about effectiveness Limited availability of the vaccine Lack of trust in healthcare providers Negative media reports	1	1	1	0	0	0	1	1	1	Health education and awareness campaigns Positive media coverage	0	0	0	0	1	0	0	0	1	424361025	92cc4989-9958-4d3e-8460-48bd2da3da45	2024-12-26 09:24:23
2024-12-26 10:24:22	2024-12-26 10:25:37	Female	31-40 years	Married	Tertiary	Christianity	Healthcare sector	Parent	4	Yes	Agree	Agree	Agree	Agree	Agree	Agree	Agree	Agree	Agree	Agree	Agree	Agree	Agree	Agree	Lack of sufficient information about the vaccine Concerns about safety Concerns about effectiveness Cost of the vaccine Parental resistance Cultural beliefs and practices Limited availability of the vaccine Lack of trust in healthcare providers Negative media reports	1	1	1	1	1	1	1	1	1	Availability in local health facilities	0	0	0	0	0	0	1	0	0	424361331	2e2ca66d-4a8d-4876-989c-643177e30a1d	2024-12-26 09:25:37
2024-12-26 10:25:37	2024-12-26 10:26:57	Female	21-30 years	Married	Secondary	Christianity	Unemployed	Parent	2	No	Agree	Agree	Agree	Agree	Agree	Agree	Agree	Agree	Agree	Agree	Disagree	Disagree	Disagree	Agree	Lack of sufficient information about the vaccine Concerns about safety Concerns about effectiveness Lack of trust in healthcare providers	1	1	1	0	0	0	0	1	0	Positive clinical trial results Health education and awareness campaigns Availability in local health facilities Trust in healthcare providers	1	0	0	0	1	0	1	1	0	424361705	aa30a977-c1f7-4932-90b4-ee5805516315	2024-12-26 09:27:00
2024-12-26 10:26:58	2024-12-26 10:28:27	Female	31-40 years	Married	Secondary	Christianity	Healthcare sector	Parent	3	No	Strongly disagree	Strongly agree	Agree	Strongly agree	Strongly agree	Strongly agree	Strongly agree	Disagree	Agree	Agree	Agree	Agree	Agree	Agree	Lack of sufficient information about the vaccine Concerns about safety Cost of the vaccine	1	1	0	1	0	0	0	0	0	Positive clinical trial results Endorsement by health authorities High demand from parents Health education and awareness campaigns Trust in healthcare providers	1	1	0	1	1	0	0	1	0	424362147	49d7e76b-14af-4eb4-b377-be10ed941f05	2024-12-26 09:28:26
2024-12-26 10:28:27	2024-12-26 10:29:44	Female	31-40 years	Married	Tertiary	Christianity	Non healthcare sector	Parent	1	No	Agree	Agree	Agree	Agree	Agree	Agree	Agree	Agree	Agree	Strongly agree	Disagree	Disagree	Agree	Agree	Lack of sufficient information about the vaccine Concerns about safety Concerns about effectiveness	1	1	1	0	0	0	0	0	0	Endorsement by health authorities Government support and subsidies Trust in healthcare providers	0	1	0	0	0	1	0	1	0	424362551	9e2de4cb-b29a-4340-9235-19f1b6256444	2024-12-26 09:29:43
2024-12-26 10:29:44	2024-12-26 10:30:55	Male	41-50 years	Married	Secondary	Christianity		Parent	5 and above	No	Disagree	Disagree		Disagree	Disagree	Disagree	Disagree	Disagree	Disagree	Disagree	Disagree	Disagree	Disagree	Disagree	Cultural beliefs and practices	0	0	0	0	0	1	0	0	0	Positive clinical trial results High demand from parents Availability in local health facilities	1	0	0	1	0	0	1	0	0	424362873	3ea5c91d-e4f0-41f5-80d8-9ecc1ab410b6	2024-12-26 09:30:55
2024-12-26 10:30:56	2024-12-26 10:32:04	Female	41-50 years	Married	Secondary	Christianity		Parent	3	Yes	Agree	Agree	Agree	Agree	Agree	Agree	Agree	Agree	Agree	Agree	Agree	Agree	Agree	Agree	Lack of sufficient information about the vaccine Parental resistance	1	0	0	0	1	0	0	0	0	Positive media coverage	0	0	0	0	0	0	0	0	1	424363228	6edc21bd-34f1-4fc7-a248-75f57174f241	2024-12-26 09:32:07
2024-12-26 10:32:04	2024-12-26 10:33:12	Female	41-50 years	Married	Secondary	Christianity	Non healthcare sector	Parent	4	No	Disagree	Disagree	Disagree	Disagree	Disagree	Disagree	Disagree	Disagree	Disagree	Disagree	Disagree	Disagree	Disagree	Disagree																					424363443	23c9e8d6-56c1-4764-9016-e3f0450d460c	2024-12-26 09:33:12
2024-12-26 10:33:12	2024-12-26 10:34:13	Male	41-50 years	Married	Tertiary	Christianity	Non healthcare sector	Parent	3	Yes	Agree	Agree	Agree	Agree	Agree	Agree	Agree	Agree	Agree	Agree	Agree	Agree	Agree	Agree																					424363703	5df50240-4b6e-49ff-acf2-c183145e4334	2024-12-26 09:34:13
2024-12-26 10:34:14	2024-12-26 10:35:20	Female	41-50 years	Married	Secondary	Christianity	Unemployed	Parent	3	No	Disagree	Disagree	Disagree	Disagree	Disagree	Disagree	Disagree	Disagree	Disagree	Disagree	Disagree	Disagree	Disagree	Disagree																					424363976	5936c407-4bbd-4d93-867d-74bf1cffe86c	2024-12-26 09:35:20
2024-12-26 10:35:21	2024-12-26 10:36:31	Male	31-40 years	Single	Tertiary	Christianity	Non healthcare sector	Guardian	5 and above	No	Disagree	Agree	Strongly disagree	Disagree	Disagree	Disagree	Disagree	Disagree	Disagree	Disagree	Disagree	Strongly disagree	Disagree	Disagree	Lack of sufficient information about the vaccine	1	0	0	0	0	0	0	0	0	Health education and awareness campaigns	0	0	0	0	1	0	0	0	0	424364438	f8cddbbd-a0e2-4dbf-9d1f-a63031f5fc2d	2024-12-26 09:36:31
2024-12-26 10:36:32	2024-12-26 10:37:47	Male	31-40 years	Married	Tertiary	Christianity	Non healthcare sector	Parent	1	Yes	Agree	Agree	Strongly agree	Agree	Strongly agree	Agree	Agree	Strongly agree	Agree	Strongly agree	Agree	Strongly agree	Agree	Agree	Concerns about safety Concerns about effectiveness Cost of the vaccine Negative media reports	0	1	1	1	0	0	0	0	1	Endorsement by health authorities Cost effectiveness High demand from parents Availability in local health facilities Positive media coverage	0	1	1	1	0	0	1	0	1	424364889	65403141-c0a1-49e0-b5f6-ed03b77b9c6f	2024-12-26 09:37:46
2024-12-26 10:37:47	2024-12-26 10:39:04	Female	51 years and above	Married	Primary	Christianity	Non healthcare sector	Grandparent	5 and above	No	Disagree	Disagree	Disagree	Disagree	Disagree	Disagree	Disagree	Agree	Disagree	Disagree	Disagree	Disagree	Disagree	Disagree	Concerns about effectiveness	0	0	1	0	0	0	0	0	0	Positive clinical trial results Positive media coverage	1	0	0	0	0	0	0	0	1	424365239	31356e31-6655-4758-b0cd-edad6abaa080	2024-12-26 09:39:04
2024-12-26 10:39:05	2024-12-26 10:40:57	Female	41-50 years	Married	Tertiary		Non healthcare sector	Parent	4	Yes	Agree	Agree	Disagree	Agree	Agree	Agree	Agree	Agree	Agree	Agree	Agree	Agree	Agree	Agree	Lack of sufficient information about the vaccine Parental resistance Lack of trust in healthcare providers	1	0	0	0	1	0	0	1	0	Positive media coverage	0	0	0	0	0	0	0	0	1	424365755	97544a4b-180b-49b5-8206-df96f44208b4	2024-12-26 09:40:56
2024-12-26 10:40:57	2024-12-26 10:42:16	Female	41-50 years	Married	Secondary	Christianity	Non healthcare sector	Parent	4	No	Agree	Agree	Agree	Agree	Agree	Agree	Agree	Agree	Agree	Agree	Agree	Agree	Agree	Agree	Lack of sufficient information about the vaccine Parental resistance Limited availability of the vaccine	1	0	0	0	1	0	1	0	0	Positive clinical trial results High demand from parents Availability in local health facilities	1	0	0	1	0	0	1	0	0	424366074	0dd33773-a002-46bf-a2ee-4dd16b27c859	2024-12-26 09:42:15
2024-12-26 10:42:16	2024-12-26 10:43:39	Female	31-40 years	Married	Tertiary	Christianity	Non healthcare sector	Parent	3	Yes	Agree	Agree	Agree	Agree	Agree	Agree	Agree	Agree	Agree	Agree	Agree	Agree	Agree	Agree	Lack of sufficient information about the vaccine Concerns about safety Cultural beliefs and practices Limited availability of the vaccine	1	1	0	0	0	1	1	0	0	Positive clinical trial results Endorsement by health authorities Government support and subsidies Positive media coverage	1	1	0	0	0	1	0	0	1	424366468	fd17699b-2496-4723-866b-22962db9f0ac	2024-12-26 09:43:39
2024-12-26 10:43:40	2024-12-26 10:45:01	Female	21-30 years	Single	Tertiary	Christianity	Non healthcare sector	Sibling	2	No	Agree	Agree	Agree	Agree	Agree	Agree	Disagree	Agree	Agree	Agree	Agree	Agree	Agree	Agree	Lack of sufficient information about the vaccine Cultural beliefs and practices Limited availability of the vaccine	1	0	0	0	0	1	1	0	0	Positive clinical trial results Endorsement by health authorities Health education and awareness campaigns	1	1	0	0	1	0	0	0	0	424366798	8768905f-d120-4002-85d9-f523948d1870	2024-12-26 09:45:00
2024-12-26 10:45:01	2024-12-26 10:46:05	Female	51 years and above	Married	Tertiary	Christianity	Non healthcare sector	Parent	3	Yes		Strongly agree													Lack of sufficient information about the vaccine Concerns about safety Concerns about effectiveness	1	1	1	0	0	0	0	0	0	Health education and awareness campaigns	0	0	0	0	1	0	0	0	0	424367103	18f063ad-c684-4ee2-95f2-fe2c9eb3ae74	2024-12-26 09:46:05
2024-12-26 10:46:05	2024-12-26 10:48:15	Male	31-40 years	Single	Secondary	Christianity	Non healthcare sector	Guardian	3	Yes	Agree	Agree	Agree	Agree	Agree	Agree	Agree	Agree	Agree	Agree	Agree	Agree	Agree	Agree	Concerns about safety Concerns about effectiveness Cultural beliefs and practices Negative media reports	0	1	1	0	0	1	0	0	1	Positive clinical trial results Government support and subsidies Positive media coverage	1	0	0	0	0	1	0	0	1	424367666	4bdbeea0-ac07-483b-b1e3-b9fac8b8dac4	2024-12-26 09:48:19
2024-12-26 10:48:15	2024-12-26 10:49:13	Male	41-50 years	Married	Secondary	Christianity	Non healthcare sector	Parent	3	No	Disagree	Disagree	Disagree	Disagree	Disagree			Disagree																											424367919	30182081-68cd-496c-b1d3-cdf860f36d6b	2024-12-26 09:49:13
2024-12-26 10:49:13	2024-12-26 10:50:21	Female	41-50 years	Married	Secondary	Christianity	Non healthcare sector	Parent	3	No	Agree	Agree	Agree	Agree	Agree	Agree	Agree	Agree	Agree	Agree		Disagree		Agree	Lack of sufficient information about the vaccine Lack of trust in healthcare providers	1	0	0	0	0	0	0	1	0	Positive media coverage	0	0	0	0	0	0	0	0	1	424368179	b812471a-a25e-4886-bcaa-8cc6f8f273ad	2024-12-26 09:50:20
2024-12-26 10:50:21	2024-12-26 10:50:56																																		Positive media coverage	0	0	0	0	0	0	0	0	1	424368440	9d1c67c3-078f-46cd-b20b-a6ba203a51cc	2024-12-26 09:50:56
2024-12-26 10:50:57	2024-12-26 10:52:17	Female	41-50 years	Married	Tertiary	Christianity	Non healthcare sector	Parent	4	Yes	Agree	Agree	Agree	Agree	Agree	Agree	Agree	Agree	Agree	Agree	Agree	Agree	Agree	Agree	Lack of sufficient information about the vaccine Parental resistance Negative media reports	1	0	0	0	1	0	0	0	1	Cost effectiveness High demand from parents Positive media coverage	0	0	1	1	0	0	0	0	1	424368740	da4f6e05-76bb-4c8a-9f76-cc463f32025f	2024-12-26 09:52:17
2024-12-26 11:18:39	2024-12-26 11:19:37	Male	41-50 years	Married	Tertiary	Christianity	Non healthcare sector	Parent	3	No	Disagree	Disagree	Disagree	Disagree	Disagree	Disagree	Disagree	Disagree	Disagree	Disagree			Disagree	Disagree																					424375783	ea105f48-f1df-4a87-8218-69cc609c7d1d	2024-12-26 10:19:37
2024-12-26 11:19:37	2024-12-26 11:20:56	Female	51 years and above	Married	Primary	Christianity	Unemployed	Parent	4	No	Disagree	Disagree	Disagree	Disagree	Disagree	Disagree	Disagree	Disagree	Disagree	Disagree	Disagree	Disagree	Disagree	Disagree	Lack of sufficient information about the vaccine Parental resistance	1	0	0	0	1	0	0	0	0	High demand from parents Positive media coverage	0	0	0	1	0	0	0	0	1	424376104	db325e72-59af-4b4b-b8e6-260f36010bc6	2024-12-26 10:20:57
2024-12-26 11:20:56	2024-12-26 11:22:56	Female	51 years and above	Widowed	Tertiary	Christianity	Non healthcare sector	Parent	3	Yes	Agree	Agree	Agree	Agree	Agree	Agree		Agree	Agree	Agree	Agree	Agree	Agree	Agree	Concerns about safety Negative media reports	0	1	0	0	0	0	0	0	1											424376566	edb68ba9-7b67-4509-8094-14e0366afa82	2024-12-26 10:22:57
2024-12-26 11:22:57	2024-12-26 11:24:36	Female	41-50 years	Married	Secondary	Christianity	Non healthcare sector	Parent	5 and above	Yes	Agree	Agree	Agree	Agree	Agree	Agree	Agree	Agree	Agree	Agree	Agree	Agree	Agree	Agree																					424376976	80393281-219a-4002-b02e-b7b9cdc2c630	2024-12-26 10:24:37
2024-12-26 11:24:36	2024-12-26 11:26:00	Male	51 years and above	Married	Secondary	Christianity	Non healthcare sector	Parent	4	No	Disagree	Disagree	Disagree	Disagree	Disagree	Disagree	Disagree	Disagree	Disagree	Disagree	Disagree	Disagree	Disagree	Disagree	Lack of sufficient information about the vaccine Parental resistance Negative media reports	1	0	0	0	1	0	0	0	1											424377304	a247e1f0-5621-4044-949c-821073fa0fe9	2024-12-26 10:26:02
2024-12-26 11:26:01	2024-12-26 11:27:02	Female	41-50 years	Married	Tertiary	Christianity		Parent	4	Yes	Agree	Agree	Agree	Agree	Agree	Agree	Agree	Agree	Agree	Agree	Agree	Agree	Agree	Agree																					424377608	584b0f2f-7beb-4f2d-af37-b1bc5291b942	2024-12-26 10:27:05
2024-12-26 11:27:02	2024-12-26 11:28:41	Female	51 years and above	Widowed	Secondary		Unemployed	Parent	5 and above	No	Disagree	Disagree	Disagree	Disagree	Disagree	Disagree	Disagree	Disagree	Disagree	Disagree	Disagree	Disagree	Disagree	Disagree	Lack of sufficient information about the vaccine Parental resistance	1	0	0	0	1	0	0	0	0	Positive clinical trial results Government support and subsidies Positive media coverage	1	0	0	0	0	1	0	0	1	424378067	6f03b61c-dd1a-4732-a581-79305d4962fe	2024-12-26 10:28:42
2024-12-26 11:28:41	2024-12-26 11:29:58	Female	41-50 years	Widowed	Secondary	Christianity	Non healthcare sector	Parent	4	Yes	Disagree	Agree	Disagree	Agree	Disagree	Disagree	Disagree	Disagree	Agree	Disagree	Disagree	Disagree		Disagree																					424378437	2454a58a-7932-43b0-bb82-54e91888239e	2024-12-26 10:29:58
2024-12-26 11:29:58	2024-12-26 11:31:29	Female	41-50 years	Married	Primary	Christianity	Unemployed	Parent	3	No	Disagree	Disagree	Disagree	Disagree	Disagree	Disagree	Disagree	Disagree	Disagree	Disagree	Disagree	Disagree	Disagree	Disagree	Parental resistance Negative media reports	0	0	0	0	1	0	0	0	1	Positive clinical trial results High demand from parents Positive media coverage	1	0	0	1	0	0	0	0	1	424378990	5142f492-d17f-4c7a-a9cb-5e1ed53c14e7	2024-12-26 10:31:30
2024-12-26 11:31:30	2024-12-26 11:35:14	Female	41-50 years	Married	Primary	Christianity	Non healthcare sector	Parent	4	No	Disagree	Disagree	Disagree	Disagree	Disagree	Disagree	Disagree	Disagree	Disagree	Disagree	Disagree	Disagree	Disagree	Disagree	Parental resistance	0	0	0	0	1	0	0	0	0	Cost effectiveness	0	0	1	0	0	0	0	0	0	424380078	72666e1c-c399-4465-b91d-4dc1a391f318	2024-12-26 10:35:17
2024-12-26 11:35:14	2024-12-26 11:36:27	Female	41-50 years	Married	Secondary	Christianity	Non healthcare sector	Parent	3	Yes	Agree	Agree	Agree	Agree	Agree	Agree	Agree	Agree	Agree	Agree	Agree	Agree	Agree	Agree	Lack of sufficient information about the vaccine Parental resistance Negative media reports	1	0	0	0	1	0	0	0	1	Positive clinical trial results Cost effectiveness Positive media coverage	1	0	1	0	0	0	0	0	1	424380540	80c9cfcd-6164-47c4-96ba-b91c10f20a3f	2024-12-26 10:36:27
2024-12-26 11:36:27	2024-12-26 11:37:57	Female	51 years and above	Married	Tertiary	Christianity	Non healthcare sector	Parent	5 and above	No	Disagree	Disagree	Disagree	Disagree	Disagree	Disagree	Disagree	Disagree	Disagree	Disagree	Disagree	Disagree	Disagree	Disagree	Lack of sufficient information about the vaccine Concerns about safety Concerns about effectiveness Lack of trust in healthcare providers Negative media reports	1	1	1	0	0	0	0	1	1	Positive clinical trial results Endorsement by health authorities Health education and awareness campaigns Trust in healthcare providers Positive media coverage	1	1	0	0	1	0	0	1	1	424380959	3216500b-a263-4b2e-a7a4-a36ee0cbe0f0	2024-12-26 10:37:57
2024-12-26 11:37:57	2024-12-26 11:39:19		51 years and above	Widowed	Secondary	Christianity	Non healthcare sector	Parent	3	No	Disagree	Disagree	Disagree	Disagree	Disagree	Disagree	Disagree	Disagree	Disagree	Disagree	Disagree	Disagree	Disagree	Disagree	Lack of sufficient information about the vaccine Parental resistance Negative media reports	1	0	0	0	1	0	0	0	1	Positive clinical trial results Health education and awareness campaigns Positive media coverage	1	0	0	0	1	0	0	0	1	424381328	42aedb5a-127b-4116-bf78-678015c5f67d	2024-12-26 10:39:19
2024-12-26 11:39:19	2024-12-26 11:40:55	Female	41-50 years	Married	Tertiary	Christianity		Parent	3	Yes	Agree	Agree	Agree	Agree	Agree	Agree	Agree	Agree	Agree	Agree	Agree	Agree	Agree	Agree	Lack of sufficient information about the vaccine Parental resistance Negative media reports	1	0	0	0	1	0	0	0	1	Cost effectiveness Positive media coverage	0	0	1	0	0	0	0	0	1	424381780	5b6904a7-2373-4d37-b403-3d2136f6c1a4	2024-12-26 10:40:55
2024-12-26 11:40:55	2024-12-26 11:42:08	Female	41-50 years	Married	Secondary		Non healthcare sector	Parent	4	Yes	Agree	Agree	Agree	Agree	Agree	Agree	Agree	Agree	Agree	Agree	Agree	Agree	Agree	Agree	Lack of sufficient information about the vaccine Parental resistance	1	0	0	0	1	0	0	0	0	Positive media coverage	0	0	0	0	0	0	0	0	1	424382070	358a08da-a49c-4f37-a925-82a1354c95bd	2024-12-26 10:42:08
2024-12-26 11:42:08	2024-12-26 11:43:24	Male	41-50 years	Married	Primary	Christianity	Non healthcare sector	Parent	3	No	Disagree	Disagree	Disagree	Disagree	Disagree	Disagree	Disagree	Disagree	Disagree	Disagree		Disagree			Negative media reports	0	0	0	0	0	0	0	0	1											424382446	bf0eb878-3fef-4cc7-b50c-6d71ed0cba93	2024-12-26 10:43:24
2024-12-26 11:43:24	2024-12-26 11:44:27	Male	31-40 years	Married	Primary	Christianity	Non healthcare sector	Parent	2	No	Disagree	Disagree	Disagree	Disagree	Disagree	Disagree	Disagree	Disagree	Disagree	Disagree																									424382699	36ef421b-a17b-4f34-b186-70be54446ff6	2024-12-26 10:44:27
2024-12-26 11:44:27	2024-12-26 11:45:34	Female	31-40 years	Married	Tertiary	Christianity	Non healthcare sector	Parent	3	No	Disagree	Disagree	Disagree	Disagree	Disagree	Disagree	Disagree	Disagree	Disagree	Disagree	Disagree	Disagree	Disagree	Disagree	Negative media reports	0	0	0	0	0	0	0	0	1	Health education and awareness campaigns	0	0	0	0	1	0	0	0	0	424382975	5c814d8d-7cdf-475b-895b-22b583fd481c	2024-12-26 10:45:34
2024-12-26 11:45:34	2024-12-26 11:46:50	Male	31-40 years	Single	Secondary	Christianity	Non healthcare sector	Sibling	5 and above	No	Agree	Agree	Strongly agree	Agree		Disagree	Disagree	Agree	Agree	Agree	Agree	Disagree	Agree	Agree																					424383379	5ad3fb21-721f-420f-ac04-aa758037b3e4	2024-12-26 10:46:49
2024-12-26 11:46:50	2024-12-26 11:48:37	Male	41-50 years	Married	Tertiary	Christianity	Non healthcare sector	Parent	1	No		Agree	Disagree	Disagree	Strongly disagree	Agree	Agree	Strongly agree	Agree	Agree	Disagree	Strongly agree	Agree	Agree	Lack of sufficient information about the vaccine Concerns about safety Cost of the vaccine Parental resistance Cultural beliefs and practices	1	1	0	1	1	1	0	0	0	Positive clinical trial results Endorsement by health authorities Cost effectiveness Government support and subsidies Availability in local health facilities	1	1	1	0	0	1	1	0	0	424383853	62d91fe5-cbd1-42ce-bfc1-492082382e28	2024-12-26 10:48:37
2024-12-26 11:48:37	2024-12-26 11:49:47	Female	41-50 years	Married	Tertiary		Non healthcare sector	Parent	5 and above	Yes	Agree	Agree	Agree	Agree	Agree	Agree	Agree	Agree	Agree	Agree	Agree	Agree	Agree		Lack of sufficient information about the vaccine Concerns about effectiveness Lack of trust in healthcare providers	1	0	1	0	0	0	0	1	0	Endorsement by health authorities High demand from parents Positive media coverage	0	1	0	1	0	0	0	0	1	424384108	963c26a6-ca53-4e1c-8993-7e79bbc6891f	2024-12-26 10:49:47
2024-12-26 11:49:47	2024-12-26 11:50:50	Male	41-50 years	Married	Secondary	Christianity	Non healthcare sector	Parent	4	No	Disagree	Disagree	Disagree	Disagree	Disagree	Disagree	Disagree	Disagree	Disagree	Disagree	Disagree	Disagree	Disagree																						424384418	aa91b39b-eae9-451c-95eb-b06512b9b693	2024-12-26 10:50:51
2024-12-26 11:50:51	2024-12-26 11:52:13	Female	21-30 years	Single	Secondary	Christianity	Student	Sibling	3	No	Agree	Agree	Agree	Agree	Agree	Agree	Agree	Agree	Agree	Agree	Agree	Agree	Agree	Agree	Parental resistance Lack of trust in healthcare providers	0	0	0	0	1	0	0	1	0											424384746	701f47b7-d544-41f6-9404-c7720383d450	2024-12-26 10:52:13
2024-12-26 11:52:13	2024-12-26 11:53:18	Male	31-40 years	Married	Secondary	Christianity	Non healthcare sector	Parent	1	No	Agree	Agree	Agree	Agree	Agree	Agree	Agree	Agree	Agree	Agree	Agree	Agree	Agree	Agree	Lack of sufficient information about the vaccine Limited availability of the vaccine	1	0	0	0	0	0	1	0	0	Positive clinical trial results Endorsement by health authorities	1	1	0	0	0	0	0	0	0	424385028	e3a96332-5b31-4d26-b0a7-d8eb7884f9bb	2024-12-26 10:53:18
2024-12-26 11:53:18	2024-12-26 11:55:21	Female	41-50 years	Married	Secondary	Christianity	Non healthcare sector	Parent	4	No	Disagree	Disagree	Disagree	Disagree	Disagree	Disagree	Disagree	Disagree	Disagree	Disagree	Disagree	Disagree	Disagree	Disagree	Lack of sufficient information about the vaccine Parental resistance Negative media reports	1	0	0	0	1	0	0	0	1	Positive clinical trial results Positive media coverage	1	0	0	0	0	0	0	0	1	424385696	c1959b54-e746-43c3-8518-91f0d49626fa	2024-12-26 10:55:21
2024-12-26 12:07:26	2024-12-26 12:08:36	Female	41-50 years	Married	Tertiary	Christianity	Non healthcare sector	Parent	5 and above	Yes	Agree	Agree	Agree	Agree	Agree	Agree	Agree	Agree	Agree	Agree	Agree	Agree		Agree	Concerns about safety Cost of the vaccine Negative media reports	0	1	0	1	0	0	0	0	1	Positive clinical trial results High demand from parents Positive media coverage	1	0	0	1	0	0	0	0	1	424389339	1f6480d9-c098-4601-af90-55d864534870	2024-12-26 11:08:36
2024-12-26 12:08:36	2024-12-26 12:09:53	Male	31-40 years	Married	Secondary	Christianity	Non healthcare sector	Parent	2	Yes	Disagree	Disagree	Disagree	Disagree	Disagree	Disagree		Disagree	Disagree		Disagree				Lack of sufficient information about the vaccine Parental resistance Cultural beliefs and practices	1	0	0	0	1	1	0	0	0	Availability in local health facilities Positive media coverage	0	0	0	0	0	0	1	0	1	424389682	03952b71-491b-4f89-80bb-f96f4d7b0c0a	2024-12-26 11:09:52
2024-12-26 12:09:53	2024-12-26 12:10:53	Female	41-50 years	Married	Secondary	Christianity	Non healthcare sector	Parent	3	No	Disagree	Disagree		Disagree		Disagree	Disagree	Disagree	Disagree		Disagree	Disagree	Disagree																						424389976	93a680ff-d55d-433d-8dc0-6920ad4a8679	2024-12-26 11:10:53
2024-12-26 12:10:54	2024-12-26 12:12:17	Male	41-50 years	Married	Tertiary	Christianity	Non healthcare sector	Parent	3	Yes	Agree	Agree	Agree	Agree	Agree	Agree	Agree	Agree	Agree	Agree	Agree	Agree	Agree	Agree	Lack of sufficient information about the vaccine Concerns about safety Parental resistance Negative media reports	1	1	0	0	1	0	0	0	1	Positive clinical trial results Endorsement by health authorities Cost effectiveness High demand from parents Positive media coverage	1	1	1	1	0	0	0	0	1	424390313	2ca6c908-3c5f-4e69-93d4-611b80de57ed	2024-12-26 11:12:17
2024-12-26 12:12:18	2024-12-26 12:13:19	Female		Widowed	Primary	Christianity		Parent	5 and above	No	Disagree	Disagree	Disagree	Disagree	Disagree	Disagree		Disagree	Disagree																										424390681	6a600eaf-a624-4ce8-9742-8425ececf68b	2024-12-26 11:13:19
2024-12-26 12:13:20	2024-12-26 12:14:36	Female	41-50 years	Married	Tertiary	Christianity	Non healthcare sector	Parent	4	Yes	Agree	Agree	Agree	Agree	Agree	Agree	Agree	Agree	Agree	Agree	Agree	Agree	Agree		Cost of the vaccine Parental resistance Cultural beliefs and practices	0	0	0	1	1	1	0	0	0	Endorsement by health authorities Cost effectiveness High demand from parents Government support and subsidies Availability in local health facilities Positive media coverage	0	1	1	1	0	1	1	0	1	424391034	d04a7d4b-9c7c-44f3-a979-3220ad94007d	2024-12-26 11:14:36
2024-12-26 12:14:36	2024-12-26 12:16:35	Male	41-50 years	Married	Secondary		Non healthcare sector	Parent	3	No	Agree	Agree	Agree	Agree	Agree	Agree		Agree	Agree	Agree	Agree	Agree		Agree	Parental resistance	0	0	0	0	1	0	0	0	0	High demand from parents Positive media coverage	0	0	0	1	0	0	0	0	1	424391809	1a847c26-1fbd-49b3-b415-f11ff50fb1de	2024-12-26 11:16:36
2024-12-26 12:16:35	2024-12-26 12:17:39	Female	41-50 years	Married	Tertiary		Non healthcare sector	Parent	3	Yes	Agree	Agree	Agree		Agree	Agree		Agree		Agree	Agree		Agree																						424392153	06665880-51c9-4a09-8529-7791e807a41c	2024-12-26 11:17:39
2024-12-26 12:17:39	2024-12-26 12:18:54	Female	51 years and above	Married	Secondary		Non healthcare sector	Parent	4	No	Disagree	Disagree			Disagree		Disagree		Disagree			Disagree		Disagree	Lack of sufficient information about the vaccine	1	0	0	0	0	0	0	0	0	Positive media coverage	0	0	0	0	0	0	0	0	1	424392605	9237c627-8fdf-49ae-b37a-be2dadafb9db	2024-12-26 11:18:53
2024-12-26 12:18:54	2024-12-26 12:20:03	Female	51 years and above	Married	Secondary		Non healthcare sector	Parent	5 and above	No	Disagree		Disagree			Disagree			Disagree	Disagree				Disagree	Lack of trust in healthcare providers	0	0	0	0	0	0	0	1	0	Cost effectiveness Availability in local health facilities	0	0	1	0	0	0	1	0	0	424392955	11090559-e7f2-4748-8876-549b1a9ea2d3	2024-12-26 11:20:02
2024-12-26 12:20:03	2024-12-26 12:21:13	Female	41-50 years	Married	Primary	Christianity	Unemployed	Parent	4	No	Disagree	Disagree	Disagree	Disagree	Disagree	Disagree	Disagree	Disagree	Disagree	Disagree	Disagree	Disagree	Disagree	Disagree	Concerns about effectiveness Lack of trust in healthcare providers	0	0	1	0	0	0	0	1	0	High demand from parents Positive media coverage	0	0	0	1	0	0	0	0	1	424393368	1f984c55-2661-4bd7-a990-8eb09f2f5285	2024-12-26 11:21:13
2024-12-26 12:21:13	2024-12-26 12:22:20	Female	51 years and above	Married	Primary	Christianity	Unemployed	Parent	2	No	Disagree	Disagree	Disagree	Disagree	Disagree	Disagree	Disagree	Disagree	Disagree	Disagree	Disagree	Disagree	Disagree	Disagree	Lack of sufficient information about the vaccine Concerns about effectiveness Lack of trust in healthcare providers	1	0	1	0	0	0	0	1	0	Cost effectiveness Positive media coverage	0	0	1	0	0	0	0	0	1	424393712	a89d2576-ba28-42d0-8237-3aa30e553bcb	2024-12-26 11:22:20
2024-12-26 12:22:20	2024-12-26 12:23:45	Female	41-50 years	Married	Tertiary	Christianity	Non healthcare sector	Parent	4	No	Agree	Agree	Strongly disagree	Disagree	Disagree	Disagree	Disagree	Disagree	Disagree	Disagree	Disagree	Disagree	Disagree	Disagree	Lack of sufficient information about the vaccine Negative media reports	1	0	0	0	0	0	0	0	1	Positive clinical trial results High demand from parents Positive media coverage	1	0	0	1	0	0	0	0	1	424394300	a38ada49-0390-42a8-8f43-78b19e467e58	2024-12-26 11:23:45
2024-12-26 12:23:46	2024-12-26 12:25:06	Male	41-50 years	Married	Secondary		Unemployed	Parent	4	No	Agree	Agree	Disagree	Disagree	Disagree	Disagree	Disagree		Disagree	Disagree	Disagree	Disagree		Disagree	Lack of sufficient information about the vaccine Lack of trust in healthcare providers	1	0	0	0	0	0	0	1	0	Positive clinical trial results High demand from parents Availability in local health facilities Positive media coverage	1	0	0	1	0	0	1	0	1	424394750	8a4b66d4-a4ec-4a09-b506-87202d6d0f9a	2024-12-26 11:25:05
2024-12-26 12:25:06	2024-12-26 12:27:07	Female	41-50 years	Married	Secondary		Non healthcare sector	Parent	2	No	Agree	Disagree	Disagree	Disagree	Disagree	Disagree	Disagree	Disagree	Disagree	Disagree	Disagree	Agree	Agree	Disagree	Lack of sufficient information about the vaccine Lack of trust in healthcare providers Negative media reports	1	0	0	0	0	0	0	1	1	Positive clinical trial results Health education and awareness campaigns Positive media coverage	1	0	0	0	1	0	0	0	1	424395458	e5771e6b-0b3b-4b87-95ff-03da6a6cf745	2024-12-26 11:27:07
2024-12-26 12:27:08	2024-12-26 12:28:25	Female	41-50 years	Married	Tertiary	Christianity	Non healthcare sector	Parent	3	Yes	Agree	Agree	Disagree	Disagree	Disagree	Disagree	Disagree	Disagree	Disagree	Disagree	Disagree	Agree	Agree	Agree	Lack of sufficient information about the vaccine Parental resistance	1	0	0	0	1	0	0	0	0	Positive clinical trial results Health education and awareness campaigns Positive media coverage	1	0	0	0	1	0	0	0	1	424395940	d395894f-635b-4bd7-a2ab-4d3e8940dcd8	2024-12-26 11:28:25
2024-12-26 12:28:26	2024-12-26 12:29:36	Male	51 years and above	Married	Primary	Christianity	Unemployed	Parent	5 and above	No	Disagree	Disagree	Disagree	Disagree	Disagree			Disagree	Disagree	Disagree	Disagree	Disagree	Disagree		Limited availability of the vaccine	0	0	0	0	0	0	1	0	0	Government support and subsidies Availability in local health facilities Trust in healthcare providers	0	0	0	0	0	1	1	1	0	424396273	358c03d7-3ddd-435b-9d90-f6bb213154bc	2024-12-26 11:29:37
2024-12-26 12:29:36	2024-12-26 12:32:15	Female	41-50 years	Married	Tertiary	Christianity	Non healthcare sector	Parent	5 and above	Yes	Agree	Agree	Disagree	Disagree	Disagree		Disagree	Agree	Agree	Disagree	Disagree	Disagree	Disagree	Disagree	Concerns about effectiveness Lack of trust in healthcare providers	0	0	1	0	0	0	0	1	0	Trust in healthcare providers	0	0	0	0	0	0	0	1	0	424397103	1fe5c0d2-108e-481d-b917-ca65c8db9831	2024-12-26 11:32:16
2024-12-26 12:32:16	2024-12-26 12:35:03	Female	41-50 years	Married	Secondary	Christianity	Non healthcare sector	Parent	3	No	Agree	Agree	Disagree	Agree	Disagree	Agree	Disagree	Disagree	Disagree	Disagree	Disagree	Disagree	Disagree	Disagree	Lack of sufficient information about the vaccine Cost of the vaccine Parental resistance Limited availability of the vaccine	1	0	0	1	1	0	1	0	0	Positive clinical trial results Cost effectiveness High demand from parents Availability in local health facilities Positive media coverage	1	0	1	1	0	0	1	0	1	424398019	2b2e0f73-6a48-41dc-b23c-912e99a0c49d	2024-12-26 11:35:03
2024-12-26 12:35:03	2024-12-26 12:36:25	Female	41-50 years	Widowed	Primary	Christianity		Parent	4	No	Agree	Agree	Disagree	Disagree	Disagree	Disagree			Disagree	Disagree	Disagree	Agree		Disagree	Lack of sufficient information about the vaccine Lack of trust in healthcare providers Negative media reports	1	0	0	0	0	0	0	1	1	Government support and subsidies Availability in local health facilities Trust in healthcare providers	0	0	0	0	0	1	1	1	0	424398363	ae88b670-92f6-4011-be89-c135511de0ff	2024-12-26 11:36:25
2024-12-26 12:36:26	2024-12-26 12:38:05	Male	41-50 years	Married	Secondary	Christianity	Unemployed	Parent	4	Yes	Agree	Agree	Disagree		Disagree						Disagree	Disagree	Disagree		Concerns about effectiveness Cultural beliefs and practices	0	0	1	0	0	1	0	0	0	High demand from parents Availability in local health facilities Positive media coverage	0	0	0	1	0	0	1	0	1	424399058	4b93b6a0-30a7-4c7b-b3a5-e9f7dcef7228	2024-12-26 11:38:05
2024-12-26 12:38:05	2024-12-26 12:39:24	Female	41-50 years	Married	Secondary	Christianity	Unemployed	Parent	4	No	Disagree	Disagree		Disagree		Disagree		Disagree		Disagree	Disagree	Disagree		Disagree	Concerns about effectiveness	0	0	1	0	0	0	0	0	0	Cost effectiveness High demand from parents Positive media coverage	0	0	1	1	0	0	0	0	1	424399461	7e2bd743-4654-4d1f-8241-614970f963ce	2024-12-26 11:39:24
2024-12-26 12:39:25	2024-12-26 12:40:48	Female	51 years and above		Secondary	Christianity	Non healthcare sector	Parent	4	No	Disagree	Disagree	Disagree	Disagree	Disagree	Disagree	Disagree	Disagree	Disagree	Disagree	Disagree	Disagree	Disagree		Lack of sufficient information about the vaccine Concerns about effectiveness Lack of trust in healthcare providers	1	0	1	0	0	0	0	1	0	Endorsement by health authorities Availability in local health facilities Positive media coverage	0	1	0	0	0	0	1	0	1	424400003	82c329ad-e8e8-42d9-bbf6-d4fcd1fe42e4	2024-12-26 11:40:48
2024-12-26 12:40:49	2024-12-26 12:42:09	Female	31-40 years	Married	Primary	Christianity	Non healthcare sector	Parent	5 and above	No	Agree	Agree	Disagree	Agree	Disagree	Disagree	Disagree			Disagree	Disagree	Disagree	Disagree		Cultural beliefs and practices	0	0	0	0	0	1	0	0	0	High demand from parents Availability in local health facilities	0	0	0	1	0	0	1	0	0	424400555	7784d15c-6430-443a-be5d-02ac61860bd7	2024-12-26 11:42:08
2024-12-26 12:42:09	2024-12-26 12:44:23	Female	41-50 years	Widowed	Primary		Non healthcare sector	Parent	4	No	Disagree	Disagree	Disagree	Disagree	Disagree	Disagree	Disagree		Disagree	Disagree	Disagree	Agree	Disagree		Lack of sufficient information about the vaccine Negative media reports	1	0	0	0	0	0	0	0	1	High demand from parents Health education and awareness campaigns Government support and subsidies	0	0	0	1	1	1	0	0	0	424401479	29e9788b-5e40-4824-aa78-a2b71b7490fe	2024-12-26 11:44:22
2024-12-26 12:44:23	2024-12-26 12:45:36	Female	41-50 years	Married	Secondary	Christianity	Unemployed	Parent	5 and above	No	Disagree	Disagree	Disagree	Disagree	Disagree		Disagree		Disagree	Disagree	Disagree	Disagree	Disagree		Lack of sufficient information about the vaccine	1	0	0	0	0	0	0	0	0	Positive media coverage	0	0	0	0	0	0	0	0	1	424401850	e2d765a8-1a25-447a-859d-8f65c1ffc6b2	2024-12-26 11:45:36
2024-12-26 14:02:01	2024-12-26 14:03:10	Male	41-50 years	Married	Tertiary	Christianity	Non healthcare sector	Parent	3	Yes	Agree	Agree	Agree	Agree	Disagree	Disagree	Disagree	Agree	Agree	Agree	Disagree	Agree	Agree		Lack of sufficient information about the vaccine Parental resistance	1	0	0	0	1	0	0	0	0	Positive clinical trial results Positive media coverage	1	0	0	0	0	0	0	0	1	424426277	4aff41c4-7e30-44de-9765-5a4b4060b514	2024-12-26 13:03:10
2024-12-26 14:03:10	2024-12-26 14:04:07	Male	41-50 years	Married	Tertiary	Christianity	Non healthcare sector	Parent	4	Yes	Agree	Agree	Agree	Agree	Agree	Agree	Agree		Agree	Agree	Agree	Agree	Agree	Agree	Lack of sufficient information about the vaccine Parental resistance	1	0	0	0	1	0	0	0	0	Positive clinical trial results High demand from parents Positive media coverage	1	0	0	1	0	0	0	0	1	424426596	1047b7b2-a98a-4124-9c9d-afe2e09d4cf7	2024-12-26 13:04:08
2024-12-26 14:04:07	2024-12-26 14:05:16	Female	41-50 years	Married	Secondary	Christianity	Non healthcare sector	Parent	3	No	Agree	Agree	Disagree	Agree		Agree		Disagree	Disagree	Agree	Agree	Disagree	Agree	Disagree																					424426892	bae75bd9-a223-46ff-a19b-7690116f3bc7	2024-12-26 13:05:16
2024-12-26 14:05:16	2024-12-26 14:06:36	Male	31-40 years	Married	Tertiary	Christianity	Non healthcare sector	Parent	3	Yes	Agree	Agree	Agree	Agree	Agree	Agree	Agree	Agree	Agree	Agree	Agree	Agree	Agree	Agree	Lack of sufficient information about the vaccine Parental resistance Negative media reports	1	0	0	0	1	0	0	0	1	Positive clinical trial results Endorsement by health authorities Cost effectiveness High demand from parents Availability in local health facilities Positive media coverage	1	1	1	1	0	0	1	0	1	424427242	98561aca-781c-4edc-a180-c5b79b2f23c7	2024-12-26 13:06:37
2024-12-26 14:06:36	2024-12-26 14:09:46	Female	31-40 years	Married	Secondary	Christianity	Non healthcare sector	Parent	1	No	Disagree	Disagree	Disagree	Disagree	Disagree	Disagree	Disagree	Disagree	Disagree	Disagree	Disagree	Disagree	Disagree	Disagree	Lack of sufficient information about the vaccine Concerns about safety Lack of trust in healthcare providers	1	1	0	0	0	0	0	1	0	Positive clinical trial results Cost effectiveness Health education and awareness campaigns Government support and subsidies	1	0	1	0	1	1	0	0	0	424428234	651fd80b-214a-448d-af87-8dfef197bb0e	2024-12-26 13:09:48
2024-12-26 14:09:46	2024-12-26 14:11:20	Female	41-50 years	Married	Secondary	Christianity	Non healthcare sector	Parent	2	Yes	Agree	Agree	Agree	Agree	Agree	Agree	Agree	Agree	Agree	Agree	Agree	Agree	Agree	Agree	Concerns about safety Parental resistance	0	1	0	0	1	0	0	0	0	Endorsement by health authorities Positive media coverage	0	1	0	0	0	0	0	0	1	424428661	09b7ab0b-6601-470e-8d3e-7c6562350992	2024-12-26 13:11:23
2024-12-26 14:11:21	2024-12-26 14:13:31	Female	41-50 years	Married	Tertiary	Christianity	Non healthcare sector	Parent	3	Yes	Disagree	Agree		Agree	Agree	Agree	Agree	Agree	Agree	Agree	Disagree	Agree	Agree	Agree	Lack of sufficient information about the vaccine Concerns about safety Concerns about effectiveness Cost of the vaccine Parental resistance Cultural beliefs and practices Limited availability of the vaccine Lack of trust in healthcare providers Negative media reports	1	1	1	1	1	1	1	1	1	Positive clinical trial results Endorsement by health authorities Cost effectiveness High demand from parents Health education and awareness campaigns Government support and subsidies Availability in local health facilities Trust in healthcare providers Positive media coverage	1	1	1	1	1	1	1	1	1	424429336	aa78e826-745d-4149-9305-c9ff54bda2c4	2024-12-26 13:13:32
2024-12-26 14:13:31	2024-12-26 14:14:38	Male	31-40 years	Married	Tertiary	Christianity	Non healthcare sector	Parent	2	No	Disagree	Agree	Agree	Agree	Agree	Agree	Agree	Agree	Agree	Agree	Agree	Agree	Agree	Agree	Lack of sufficient information about the vaccine Concerns about safety Concerns about effectiveness Cost of the vaccine Parental resistance Cultural beliefs and practices Limited availability of the vaccine Lack of trust in healthcare providers Negative media reports	1	1	1	1	1	1	1	1	1	Positive clinical trial results Endorsement by health authorities Cost effectiveness High demand from parents Health education and awareness campaigns Government support and subsidies Availability in local health facilities Trust in healthcare providers Positive media coverage	1	1	1	1	1	1	1	1	1	424429715	b6d633c6-fd08-46dc-86d2-59308e4e1be8	2024-12-26 13:14:39
2024-12-26 14:14:38	2024-12-26 14:16:21	Female	31-40 years	Married	Tertiary	Christianity	Non healthcare sector	Parent	3	No	Strongly disagree	Agree	Agree	Agree	Agree	Agree	Agree	Agree	Agree	Agree	Agree	Agree	Agree	Agree	Lack of sufficient information about the vaccine Concerns about safety Concerns about effectiveness Cultural beliefs and practices Limited availability of the vaccine Lack of trust in healthcare providers	1	1	1	0	0	1	1	1	0	Positive clinical trial results Health education and awareness campaigns Government support and subsidies Trust in healthcare providers Positive media coverage	1	0	0	0	1	1	0	1	1	424430263	e4c4369a-848c-45cb-950c-5f6489229271	2024-12-26 13:16:22
2024-12-26 14:16:21	2024-12-26 14:19:25	Male	41-50 years	Married	Tertiary	Christianity	Non healthcare sector	Parent	3	No	Agree	Strongly disagree	Agree	Agree	Agree	Agree	Agree	Agree	Agree	Agree	Agree	Agree	Agree	Agree	Cultural beliefs and practices	0	0	0	0	0	1	0	0	0	Endorsement by health authorities	0	1	0	0	0	0	0	0	0	424431267	ae61db0f-c083-460e-a736-b0498d38cf65	2024-12-26 13:19:27
2024-12-26 14:19:26	2024-12-26 14:20:29	Male	51 years and above	Married	Secondary	Christianity	Non healthcare sector	Parent	2	No	Agree	Agree	Agree	Agree	Agree	Agree	Agree	Agree	Agree	Strongly agree	Agree	Agree	Agree	Strongly agree	Parental resistance	0	0	0	0	1	0	0	0	0	Cost effectiveness	0	0	1	0	0	0	0	0	0	424431515	2632f619-d952-4d63-9390-dc969b4bbbaf	2024-12-26 13:20:30
2024-12-26 14:20:30	2024-12-26 14:21:51	Female	51 years and above	Married	Tertiary	Christianity	Non healthcare sector	Grandparent	4	Yes	Strongly disagree	Strongly agree	Disagree	Disagree	Strongly disagree	Disagree	Disagree	Strongly disagree	Disagree	Strongly disagree	Strongly disagree	Strongly disagree	Disagree	Disagree	Concerns about safety	0	1	0	0	0	0	0	0	0	Positive clinical trial results	1	0	0	0	0	0	0	0	0	424431900	efac8afd-f6ee-4074-84de-872c2a9ce593	2024-12-26 13:21:52
2024-12-26 14:21:51	2024-12-26 14:23:05	Female	51 years and above	Married	Primary	Christianity	Unemployed	Parent	4	No	Disagree	Disagree	Disagree	Disagree	Disagree	Disagree	Disagree	Disagree	Disagree	Disagree	Disagree	Disagree	Disagree	Disagree	Lack of sufficient information about the vaccine Concerns about safety Concerns about effectiveness Cost of the vaccine Parental resistance Cultural beliefs and practices Limited availability of the vaccine Lack of trust in healthcare providers Negative media reports	1	1	1	1	1	1	1	1	1	Positive clinical trial results Endorsement by health authorities Cost effectiveness High demand from parents Health education and awareness campaigns Government support and subsidies Availability in local health facilities Trust in healthcare providers Positive media coverage	1	1	1	1	1	1	1	1	1	424432431	03dd3fea-8f1a-4ed6-97bf-17f591223897	2024-12-26 13:23:05
2024-12-26 14:23:05	2024-12-26 14:24:25	Female	31-40 years	Married	Tertiary	Christianity	Non healthcare sector	Parent	5 and above	No	Agree	Disagree	Agree	Agree		Agree	Strongly agree	Agree	Agree	Agree	Agree	Agree	Disagree	Agree	Lack of sufficient information about the vaccine Concerns about safety Concerns about effectiveness Cost of the vaccine Limited availability of the vaccine	1	1	1	1	0	0	1	0	0	Positive clinical trial results Endorsement by health authorities Cost effectiveness Government support and subsidies Availability in local health facilities	1	1	1	0	0	1	1	0	0	424432852	57c5f540-b295-4296-b704-c05d9d4d8ebf	2024-12-26 13:24:25
2024-12-26 14:24:25	2024-12-26 14:25:48	Female	41-50 years	Married	Tertiary	Christianity	Non healthcare sector	Parent	1	No	Strongly disagree	Disagree	Strongly disagree	Strongly disagree	Disagree	Disagree	Disagree	Disagree	Strongly disagree	Disagree	Strongly disagree	Strongly disagree	Disagree	Disagree	Concerns about safety	0	1	0	0	0	0	0	0	0	Positive clinical trial results	1	0	0	0	0	0	0	0	0	424433352	342493bb-7ba7-4a89-bca3-b6aba10ce14c	2024-12-26 13:25:54
2024-12-26 14:25:48	2024-12-26 14:26:54	Female	41-50 years	Married	Secondary	Christianity	Non healthcare sector	Parent	3	No	Agree	Agree	Disagree	Disagree	Disagree	Disagree		Disagree		Disagree					Lack of sufficient information about the vaccine Negative media reports	1	0	0	0	0	0	0	0	1	Positive clinical trial results Health education and awareness campaigns Government support and subsidies Positive media coverage	1	0	0	0	1	1	0	0	1	424433844	efc80b30-6e9b-404a-ac9a-4cae4c8d8110	2024-12-26 13:26:54
2024-12-26 14:26:54	2024-12-26 14:28:07	Female	51 years and above	Married	Primary	Christianity	Unemployed	Parent	4	No	Agree	Agree	Disagree	Disagree	Disagree		Disagree		Disagree		Disagree	Disagree		Disagree	Lack of sufficient information about the vaccine Lack of trust in healthcare providers	1	0	0	0	0	0	0	1	0	Endorsement by health authorities Availability in local health facilities Positive media coverage	0	1	0	0	0	0	1	0	1	424434241	2f0cdddf-b452-4c87-af4c-827f0f5bb935	2024-12-26 13:28:07
2024-12-26 14:28:07	2024-12-26 14:29:22	Male	51 years and above	Married	Secondary	Christianity	Unemployed	Parent	4	No	Disagree	Disagree	Disagree	Disagree	Disagree	Disagree	Disagree	Disagree	Disagree	Disagree	Disagree		Disagree	Disagree	Lack of sufficient information about the vaccine Concerns about safety Concerns about effectiveness Cost of the vaccine Parental resistance Cultural beliefs and practices Limited availability of the vaccine Lack of trust in healthcare providers Negative media reports	1	1	1	1	1	1	1	1	1	Positive clinical trial results Endorsement by health authorities Cost effectiveness High demand from parents Health education and awareness campaigns Government support and subsidies Availability in local health facilities Trust in healthcare providers Positive media coverage	1	1	1	1	1	1	1	1	1	424434686	8ecaa6d8-43ac-4a1a-a369-603d76ff353f	2024-12-26 13:29:22
2024-12-26 14:29:22	2024-12-26 14:30:39	Female	51 years and above	Married	Primary	Christianity	Unemployed	Parent	5 and above	No	Agree	Agree	Agree	Agree	Agree	Agree	Agree	Agree	Agree	Agree	Agree	Agree	Agree	Agree	Lack of sufficient information about the vaccine Concerns about safety Concerns about effectiveness Cost of the vaccine Parental resistance Cultural beliefs and practices Limited availability of the vaccine Lack of trust in healthcare providers Negative media reports	1	1	1	1	1	1	1	1	1	Positive clinical trial results Endorsement by health authorities Cost effectiveness High demand from parents Health education and awareness campaigns Government support and subsidies Availability in local health facilities Trust in healthcare providers Positive media coverage	1	1	1	1	1	1	1	1	1	424435031	6b5d4271-18ec-4ad2-8e1a-db0984731555	2024-12-26 13:30:39
2024-12-26 14:30:39	2024-12-26 14:32:01	Male	51 years and above	Married	Tertiary	Christianity	Non healthcare sector	Parent	3	No	Strongly agree	Strongly agree		Agree	Strongly agree	Agree	Disagree	Agree		Agree	Agree	Agree	Agree	Agree	Lack of sufficient information about the vaccine Concerns about safety Concerns about effectiveness Cost of the vaccine Parental resistance Cultural beliefs and practices Limited availability of the vaccine Lack of trust in healthcare providers Negative media reports	1	1	1	1	1	1	1	1	1	Positive clinical trial results Endorsement by health authorities Cost effectiveness High demand from parents Health education and awareness campaigns Government support and subsidies Availability in local health facilities Trust in healthcare providers Positive media coverage	1	1	1	1	1	1	1	1	1	424435434	d7db561e-53ef-46e5-94c3-a7733896b4f9	2024-12-26 13:32:02
2024-12-26 14:32:01	2024-12-26 14:33:05	Male	51 years and above	Married	Secondary	Christianity	Non healthcare sector	Parent	5 and above	No	Agree	Agree	Agree	Agree	Agree	Agree	Agree	Agree	Agree	Agree	Agree	Agree	Agree	Agree	Lack of sufficient information about the vaccine Concerns about safety Concerns about effectiveness Cost of the vaccine Parental resistance Cultural beliefs and practices Limited availability of the vaccine Lack of trust in healthcare providers Negative media reports	1	1	1	1	1	1	1	1	1	Positive clinical trial results Endorsement by health authorities Cost effectiveness High demand from parents Health education and awareness campaigns Government support and subsidies Availability in local health facilities Trust in healthcare providers Positive media coverage	1	1	1	1	1	1	1	1	1	424435793	8b83d65e-9689-440b-8380-8138f9cc4967	2024-12-26 13:33:05
2024-12-26 14:33:05	2024-12-26 14:34:10	Female	41-50 years	Married	Tertiary	Christianity	Non healthcare sector	Parent	4	No	Agree	Agree	Agree	Agree	Agree	Agree	Strongly agree	Strongly agree	Strongly agree	Strongly agree	Strongly agree	Strongly agree	Agree	Agree	Lack of sufficient information about the vaccine Concerns about safety Concerns about effectiveness Cost of the vaccine Parental resistance Cultural beliefs and practices Limited availability of the vaccine Lack of trust in healthcare providers Negative media reports	1	1	1	1	1	1	1	1	1	Positive clinical trial results Endorsement by health authorities Cost effectiveness High demand from parents Health education and awareness campaigns Government support and subsidies Availability in local health facilities Trust in healthcare providers Positive media coverage	1	1	1	1	1	1	1	1	1	424436228	910352ab-69cc-4a81-b847-325e3c57b2ab	2024-12-26 13:34:10
2024-12-26 14:34:10	2024-12-26 14:35:20	Female	41-50 years	Married	Tertiary	Christianity	Healthcare sector	Parent	2	Yes	Agree	Agree	Agree	Agree	Agree	Agree	Agree	Agree	Agree	Agree	Agree	Agree	Agree	Agree	Lack of sufficient information about the vaccine Concerns about safety Concerns about effectiveness Cost of the vaccine Parental resistance Cultural beliefs and practices Limited availability of the vaccine Lack of trust in healthcare providers Negative media reports	1	1	1	1	1	1	1	1	1	Positive clinical trial results Endorsement by health authorities Cost effectiveness High demand from parents Health education and awareness campaigns Government support and subsidies Availability in local health facilities Trust in healthcare providers Positive media coverage	1	1	1	1	1	1	1	1	1	424436623	d74a0b6b-791c-4917-8262-5b77c50f84b5	2024-12-26 13:35:19
2024-12-26 14:35:20	2024-12-26 14:36:28	Female	41-50 years	Married	Secondary	Christianity	Unemployed	Parent	4	Yes	Agree	Agree	Agree	Agree	Agree	Agree	Agree	Agree	Agree	Agree	Agree	Agree	Agree	Agree	Lack of sufficient information about the vaccine Concerns about safety Concerns about effectiveness Cost of the vaccine Parental resistance Cultural beliefs and practices Limited availability of the vaccine Lack of trust in healthcare providers Negative media reports	1	1	1	1	1	1	1	1	1	Positive clinical trial results Endorsement by health authorities Cost effectiveness High demand from parents Health education and awareness campaigns Government support and subsidies Availability in local health facilities Trust in healthcare providers Positive media coverage	1	1	1	1	1	1	1	1	1	424437036	4c2dc322-e27b-4e38-bca3-5f06d2a3f4eb	2024-12-26 13:36:28
2024-12-26 14:36:28	2024-12-26 14:37:49	Female	31-40 years	Married	Secondary	Christianity	Unemployed	Parent	3	No	Disagree	Disagree	Disagree	Disagree	Agree	Disagree	Disagree	Agree	Agree	Disagree	Disagree	Agree	Disagree	Agree	Lack of sufficient information about the vaccine Concerns about safety Concerns about effectiveness Cost of the vaccine Parental resistance Cultural beliefs and practices Limited availability of the vaccine Lack of trust in healthcare providers Negative media reports	1	1	1	1	1	1	1	1	1	Positive clinical trial results Endorsement by health authorities Cost effectiveness High demand from parents Health education and awareness campaigns Government support and subsidies Availability in local health facilities Trust in healthcare providers Positive media coverage	1	1	1	1	1	1	1	1	1	424437414	799540ea-da44-4fcb-a885-47e6099cdbd4	2024-12-26 13:37:49
2024-12-26 14:47:05	2024-12-26 14:48:47	Male	41-50 years	Married	Secondary	Christianity	Healthcare sector	Parent	3	Yes	Agree	Agree	Agree	Agree	Agree	Agree	Agree	Agree	Agree	Disagree	Agree	Disagree	Agree	Agree	Lack of sufficient information about the vaccine Concerns about safety Concerns about effectiveness Cost of the vaccine Parental resistance Cultural beliefs and practices Limited availability of the vaccine Lack of trust in healthcare providers Negative media reports	1	1	1	1	1	1	1	1	1	Positive clinical trial results Endorsement by health authorities Cost effectiveness High demand from parents Health education and awareness campaigns Government support and subsidies Availability in local health facilities Trust in healthcare providers Positive media coverage	1	1	1	1	1	1	1	1	1	424440303	47bb0e62-034a-4c14-98a1-3b6fad72f902	2024-12-26 13:48:48
2024-12-26 14:48:47	2024-12-26 14:50:07	Male	31-40 years	Married	Secondary	Christianity	Unemployed	Parent	1	No	Agree	Agree	Agree	Agree	Agree	Agree	Agree	Agree	Agree	Agree	Agree	Agree	Agree		Lack of sufficient information about the vaccine Concerns about safety Concerns about effectiveness Cost of the vaccine Parental resistance Cultural beliefs and practices Limited availability of the vaccine Lack of trust in healthcare providers Negative media reports	1	1	1	1	1	1	1	1	1	Positive clinical trial results Endorsement by health authorities Cost effectiveness High demand from parents Health education and awareness campaigns Government support and subsidies Availability in local health facilities Trust in healthcare providers Positive media coverage	1	1	1	1	1	1	1	1	1	424440693	9a1b18a6-d93c-4688-b2a7-9bcf3ed06b73	2024-12-26 13:50:07
2024-12-26 14:50:07	2024-12-26 14:52:22	Male	41-50 years	Married	Tertiary	Christianity	Non healthcare sector	Parent	3	No	Disagree	Disagree	Disagree	Disagree	Disagree	Disagree	Disagree	Disagree	Disagree	Disagree	Disagree	Disagree	Disagree	Disagree	Lack of sufficient information about the vaccine Cost of the vaccine Negative media reports	1	0	0	1	0	0	0	0	1	Positive clinical trial results Health education and awareness campaigns Government support and subsidies Availability in local health facilities Positive media coverage	1	0	0	0	1	1	1	0	1	424441502	134b08eb-41c0-4071-be60-1f203583384a	2024-12-26 13:52:24
2024-12-26 14:52:23	2024-12-26 14:53:42	Female	51 years and above	Married	Secondary	Christianity	Non healthcare sector	Parent	5 and above	No	Disagree	Disagree	Disagree	Disagree	Disagree	Disagree	Disagree	Disagree	Disagree	Disagree	Disagree	Disagree	Disagree	Disagree	Lack of sufficient information about the vaccine Concerns about effectiveness Cultural beliefs and practices Limited availability of the vaccine Lack of trust in healthcare providers Negative media reports	1	0	1	0	0	1	1	1	1	Positive clinical trial results Endorsement by health authorities High demand from parents Health education and awareness campaigns Trust in healthcare providers Positive media coverage	1	1	0	1	1	0	0	1	1	424441983	1fd48a3d-9774-48da-afeb-204ffc4b530b	2024-12-26 13:53:43
2024-12-26 14:53:42	2024-12-26 14:55:13	Female	41-50 years	Married	Tertiary	Christianity	Non healthcare sector	Parent	3	Yes	Agree	Agree	Agree	Agree	Agree	Agree	Agree	Agree	Agree	Agree	Agree	Agree	Agree	Agree	Limited availability of the vaccine	0	0	0	0	0	0	1	0	0	Health education and awareness campaigns	0	0	0	0	1	0	0	0	0	424442530	ee985a29-0835-4779-b91d-ee626cebe320	2024-12-26 13:55:14
2024-12-26 14:55:13	2024-12-26 14:56:35	Female	31-40 years	Married	Secondary	Christianity	Non healthcare sector	Parent	2	Yes	Agree	Agree	Agree	Agree	Agree	Agree	Agree	Agree	Agree	Agree	Agree	Agree	Agree	Agree	Lack of sufficient information about the vaccine Cost of the vaccine Limited availability of the vaccine Lack of trust in healthcare providers	1	0	0	1	0	0	1	1	0	Positive clinical trial results Cost effectiveness High demand from parents Trust in healthcare providers Positive media coverage	1	0	1	1	0	0	0	1	1	424442934	15604ad3-5484-4ac6-8415-020ba32102dc	2024-12-26 13:56:36
2024-12-26 14:56:35	2024-12-26 14:57:47	Female	41-50 years	Married	Secondary	Christianity	Unemployed	Parent	3	No	Disagree	Disagree	Disagree	Disagree	Disagree	Disagree	Disagree	Disagree	Disagree	Disagree	Disagree	Disagree	Disagree	Disagree	Lack of sufficient information about the vaccine Negative media reports	1	0	0	0	0	0	0	0	1	Endorsement by health authorities Health education and awareness campaigns Availability in local health facilities Trust in healthcare providers Positive media coverage	0	1	0	0	1	0	1	1	1	424443356	3ed577b3-80a3-4150-810b-7bd2d88393ba	2024-12-26 13:57:47
2024-12-26 14:57:47	2024-12-26 14:58:53	Male	41-50 years	Married	Tertiary	Christianity	Non healthcare sector	Parent	4	Yes	Agree	Agree	Agree	Agree	Agree	Agree	Agree	Agree	Agree	Agree	Disagree	Agree	Agree	Agree	Lack of sufficient information about the vaccine Concerns about effectiveness Cultural beliefs and practices	1	0	1	0	0	1	0	0	0											424443721	6aec4151-bbf5-4a1e-949e-a42a711fa1db	2024-12-26 13:58:54
2024-12-26 14:58:53	2024-12-26 15:00:18	Male	51 years and above	Married	Tertiary	Christianity	Non healthcare sector	Parent	3	Yes	Agree	Agree	Agree	Agree	Agree	Agree	Agree	Agree	Agree	Agree	Agree	Agree	Agree	Agree	Lack of sufficient information about the vaccine Concerns about safety Cost of the vaccine	1	1	0	1	0	0	0	0	0	Cost effectiveness Health education and awareness campaigns Government support and subsidies Availability in local health facilities Trust in healthcare providers	0	0	1	0	1	1	1	1	0	424444285	29ab44b0-37ab-4a4a-8c98-82818189587c	2024-12-26 14:00:19
2024-12-26 15:00:18	2024-12-26 15:03:12	Female	51 years and above	Married	Primary	Christianity	Unemployed	Parent	2	No	Disagree	Disagree	Disagree	Disagree	Disagree	Disagree	Disagree	Disagree	Disagree	Disagree	Disagree	Disagree	Disagree	Disagree	Lack of sufficient information about the vaccine	1	0	0	0	0	0	0	0	0											424445514	bc1474aa-2296-430a-8ecb-e07d96a775f5	2024-12-26 14:03:14
2024-12-26 15:03:12	2024-12-26 15:04:46	Male	41-50 years	Married	Tertiary	Christianity	Non healthcare sector	Parent	3	Yes	Agree	Agree	Agree	Agree	Agree	Agree	Agree	Agree	Agree	Agree	Agree	Agree	Agree	Agree	Cultural beliefs and practices	0	0	0	0	0	1	0	0	0	High demand from parents	0	0	0	1	0	0	0	0	0	424445914	cead1442-9437-4382-a0e9-6c2bd3733892	2024-12-26 14:04:46
2024-12-26 15:04:46	2024-12-26 15:06:32	Female	51 years and above	Married	Secondary	Christianity	Unemployed	Parent	3	No	Disagree	Disagree	Disagree	Disagree	Disagree	Disagree	Disagree	Disagree	Disagree	Strongly disagree	Disagree	Disagree	Disagree	Disagree	Lack of sufficient information about the vaccine Concerns about safety	1	1	0	0	0	0	0	0	0											424446328	7c849bbd-1804-447d-83f6-635af61b26d0	2024-12-26 14:06:32
2024-12-26 15:06:32	2024-12-26 15:07:33	Female	41-50 years	Married	Primary	Christianity	Unemployed	Parent	3	No	Disagree	Disagree	Disagree	Disagree	Disagree	Disagree	Disagree	Disagree	Disagree	Disagree	Disagree	Disagree	Disagree	Disagree																					424446595	5102e502-f9e2-4a82-8015-149b420a8397	2024-12-26 14:07:34
2024-12-26 15:07:33	2024-12-26 15:11:32	Female	41-50 years	Married	Tertiary	Christianity	Non healthcare sector	Parent	4	Yes	Agree	Agree	Agree	Agree	Agree	Agree	Agree	Agree	Agree	Agree	Agree	Agree	Agree	Agree	Lack of sufficient information about the vaccine Concerns about safety Concerns about effectiveness Cost of the vaccine Parental resistance Cultural beliefs and practices Limited availability of the vaccine Lack of trust in healthcare providers Negative media reports	1	1	1	1	1	1	1	1	1	Positive clinical trial results Endorsement by health authorities Cost effectiveness High demand from parents Health education and awareness campaigns Government support and subsidies Availability in local health facilities Trust in healthcare providers Positive media coverage	1	1	1	1	1	1	1	1	1	424447759	3f12ad65-f151-4920-8d38-b445345d5610	2024-12-26 14:11:33
2024-12-26 15:11:32	2024-12-26 15:22:01	Male	51 years and above	Married	Secondary	Christianity	Non healthcare sector	Parent	5 and above	No	Disagree	Disagree	Disagree	Disagree	Disagree	Disagree	Disagree	Disagree	Disagree	Disagree	Disagree	Disagree	Disagree	Disagree	Lack of sufficient information about the vaccine Concerns about safety Concerns about effectiveness Cost of the vaccine Parental resistance Cultural beliefs and practices Limited availability of the vaccine Lack of trust in healthcare providers Negative media reports	1	1	1	1	1	1	1	1	1	Positive clinical trial results Endorsement by health authorities Cost effectiveness High demand from parents Health education and awareness campaigns Government support and subsidies Availability in local health facilities Trust in healthcare providers Positive media coverage	1	1	1	1	1	1	1	1	1	424450697	e6c6fb95-273e-4dc6-82c2-cdfb5ae02607	2024-12-26 14:22:01
2024-12-26 15:22:01	2024-12-26 15:23:11	Female	41-50 years	Married	Secondary		Non healthcare sector	Parent	5 and above	No	Agree	Agree	Agree	Agree	Agree	Agree	Agree	Agree	Agree	Agree	Agree	Agree	Agree	Agree	Lack of sufficient information about the vaccine Cost of the vaccine Negative media reports	1	0	0	1	0	0	0	0	1	Positive clinical trial results Positive media coverage	1	0	0	0	0	0	0	0	1	424450945	c95c21ae-37cf-4f62-b109-6bac671b0635	2024-12-26 14:23:11
2024-12-26 15:23:11	2024-12-26 15:24:36	Male	51 years and above	Married	Primary	Christianity	Unemployed	Parent	5 and above	No	Agree	Agree	Agree	Agree	Agree	Agree	Agree	Agree	Agree	Agree	Agree	Agree	Agree	Agree	Lack of sufficient information about the vaccine Concerns about effectiveness Cultural beliefs and practices Negative media reports	1	0	1	0	0	1	0	0	1	Positive clinical trial results Endorsement by health authorities Health education and awareness campaigns Availability in local health facilities Trust in healthcare providers Positive media coverage	1	1	0	0	1	0	1	1	1	424451308	43c4778b-32f3-40ba-954f-0d573fabb187	2024-12-26 14:24:36
2024-12-26 15:24:36	2024-12-26 15:25:45	Female	51 years and above	Married	Secondary	Christianity	Non healthcare sector	Parent	2	No	Agree	Agree	Agree	Agree	Agree	Agree	Agree	Agree	Agree	Agree	Agree	Agree	Agree	Agree																					424451645	c701ac63-87ee-47e1-8157-4b7956e3041d	2024-12-26 14:25:44
2024-12-26 15:25:45	2024-12-26 15:26:54	Female	41-50 years	Married	Tertiary	Christianity	Non healthcare sector	Parent	3	No	Disagree	Disagree	Disagree	Disagree	Disagree	Disagree	Disagree	Disagree	Disagree	Disagree	Disagree	Disagree	Disagree	Disagree	Lack of sufficient information about the vaccine Concerns about safety Negative media reports	1	1	0	0	0	0	0	0	1	Positive clinical trial results Endorsement by health authorities Health education and awareness campaigns Positive media coverage	1	1	0	0	1	0	0	0	1	424452032	a86ba214-6f9b-4f33-89b9-e2010e363203	2024-12-26 14:26:54
2024-12-26 15:26:54	2024-12-26 15:27:52	Female	41-50 years	Married	Secondary	Christianity	Non healthcare sector	Parent	5 and above	No	Disagree	Disagree	Disagree	Disagree	Disagree	Disagree	Disagree	Disagree	Disagree	Disagree	Disagree	Disagree	Disagree	Disagree																					424452311	13bb8e33-e4c4-4e84-a163-0bb6672b55ff	2024-12-26 14:27:51
2024-12-26 15:27:52	2024-12-26 15:30:21	Male	41-50 years	Married	Tertiary	Christianity	Non healthcare sector	Parent	2	No	Agree	Disagree	Agree	Disagree	Agree	Agree	Agree	Agree	Agree	Agree	Disagree	Agree	Agree	Agree																					424452988	bc328e30-ab7b-4159-b009-ef2e910a5114	2024-12-26 14:30:20
2024-12-26 15:30:21	2024-12-26 15:31:36	Male	51 years and above	Married	Secondary	Christianity	Non healthcare sector	Parent	5 and above	Yes	Agree	Agree	Agree	Agree	Agree	Agree	Agree	Agree	Agree	Agree	Agree	Agree	Agree	Agree	Cultural beliefs and practices	0	0	0	0	0	1	0	0	0	High demand from parents	0	0	0	1	0	0	0	0	0	424453291	eeec8de8-cf28-4b1d-8de3-913f629f3156	2024-12-26 14:31:36
2024-12-26 15:31:36	2024-12-26 15:32:43	Female	51 years and above	Married	Secondary	Christianity	Non healthcare sector	Parent	3	No	Agree	Agree		Agree	Agree	Agree	Agree	Agree	Agree	Agree	Agree	Agree	Agree	Agree																					424453671	923b200c-1393-4b8b-ae1d-5543ea07761a	2024-12-26 14:32:43
2024-12-26 15:32:43	2024-12-26 15:33:51	Female	41-50 years	Married	Secondary	Christianity	Non healthcare sector	Parent	4	No	Disagree	Disagree	Disagree	Disagree	Disagree	Disagree	Disagree	Disagree	Disagree	Disagree	Disagree	Disagree	Disagree	Disagree																					424454214	53158a24-4ed8-47db-85cb-db40b5de9927	2024-12-26 14:33:52
2024-12-26 15:33:51	2024-12-26 15:35:02	Female	41-50 years	Married	Secondary	Christianity	Non healthcare sector	Parent	3	No	Disagree	Disagree	Disagree	Disagree	Disagree	Disagree	Disagree	Disagree	Disagree	Disagree	Disagree	Disagree	Disagree	Disagree	Lack of sufficient information about the vaccine Concerns about safety Concerns about effectiveness Negative media reports	1	1	1	0	0	0	0	0	1	Positive clinical trial results Endorsement by health authorities Cost effectiveness High demand from parents Health education and awareness campaigns Government support and subsidies Availability in local health facilities Trust in healthcare providers Positive media coverage	1	1	1	1	1	1	1	1	1	424454706	eda544f6-0553-484c-82e9-fe2b87639b5d	2024-12-26 14:35:02
2024-12-26 15:35:02	2024-12-26 15:36:16	Female	51 years and above	Married			Healthcare sector	Parent	4	Yes	Agree	Agree	Agree	Agree	Agree	Agree	Agree	Agree	Agree	Agree	Agree	Agree	Agree	Agree	Lack of sufficient information about the vaccine Concerns about safety Concerns about effectiveness Cost of the vaccine Parental resistance Cultural beliefs and practices Limited availability of the vaccine Lack of trust in healthcare providers Negative media reports	1	1	1	1	1	1	1	1	1	Positive clinical trial results Endorsement by health authorities Cost effectiveness High demand from parents Health education and awareness campaigns Government support and subsidies Availability in local health facilities Trust in healthcare providers Positive media coverage	1	1	1	1	1	1	1	1	1	424455088	6d321dd0-6b6e-4402-a55e-f9da20d8c836	2024-12-26 14:36:17
2024-12-26 16:03:59	2024-12-26 16:04:50	Female	41-50 years	Married	Secondary	Christianity	Unemployed	Parent	3	No	Disagree	Disagree	Disagree	Disagree	Disagree	Disagree	Disagree	Disagree	Disagree	Disagree	Disagree	Disagree	Disagree	Disagree																					424463014	0f26f8a6-f31f-403f-b632-935577f805c4	2024-12-26 15:04:49
2024-12-26 16:04:50	2024-12-26 16:05:55	Female	41-50 years	Married	Tertiary		Healthcare sector	Parent	4	Yes	Agree	Agree	Agree	Agree	Agree	Agree	Agree	Agree	Agree	Agree	Agree	Agree	Agree	Agree																					424463308	a40bfe14-7656-4e75-98fe-349d4650f5e1	2024-12-26 15:05:55
2024-12-26 16:05:55	2024-12-26 16:07:03	Female	51 years and above	Married	Tertiary		Healthcare sector	Parent	3	Yes	Agree	Agree	Agree	Agree	Agree	Agree	Agree	Agree	Agree	Agree	Agree	Agree	Agree	Agree	Lack of sufficient information about the vaccine Concerns about safety Cost of the vaccine Cultural beliefs and practices Negative media reports	1	1	0	1	0	1	0	0	1	Positive clinical trial results Endorsement by health authorities Cost effectiveness High demand from parents Health education and awareness campaigns Government support and subsidies Availability in local health facilities Trust in healthcare providers Positive media coverage	1	1	1	1	1	1	1	1	1	424463646	2e92cbf3-edf6-419b-8eb8-03c8ee471269	2024-12-26 15:07:03
2024-12-26 16:07:03	2024-12-26 16:08:12	Female	51 years and above	Married	Primary	Christianity	Unemployed	Parent	5 and above	No	Disagree	Disagree	Disagree	Disagree	Disagree	Disagree	Disagree	Disagree	Disagree	Disagree	Disagree	Disagree	Disagree	Disagree	Lack of sufficient information about the vaccine Concerns about safety Concerns about effectiveness Cost of the vaccine Parental resistance Cultural beliefs and practices Limited availability of the vaccine Lack of trust in healthcare providers Negative media reports	1	1	1	1	1	1	1	1	1	Positive clinical trial results Endorsement by health authorities Cost effectiveness High demand from parents Health education and awareness campaigns Availability in local health facilities Trust in healthcare providers	1	1	1	1	1	0	1	1	0	424464016	2df6e94a-9cdf-43a0-a7ea-eddb7686971b	2024-12-26 15:08:13
2024-12-26 16:08:12	2024-12-26 16:09:22	Female	41-50 years	Married	Secondary	Christianity	Unemployed	Parent	5 and above	No	Disagree	Disagree	Disagree	Disagree	Disagree	Disagree	Disagree	Disagree	Disagree	Disagree	Disagree	Disagree	Disagree	Disagree	Lack of sufficient information about the vaccine Concerns about safety Concerns about effectiveness Cost of the vaccine Parental resistance Cultural beliefs and practices Limited availability of the vaccine Lack of trust in healthcare providers Negative media reports	1	1	1	1	1	1	1	1	1	Positive clinical trial results Endorsement by health authorities Cost effectiveness High demand from parents Health education and awareness campaigns Government support and subsidies Availability in local health facilities Trust in healthcare providers Positive media coverage	1	1	1	1	1	1	1	1	1	424464360	1a2e593c-83ba-4e4d-8bf2-bb4ccb705a00	2024-12-26 15:09:23
2024-12-26 16:09:22	2024-12-26 16:10:22	Female	51 years and above	Married	Tertiary	Christianity	Non healthcare sector	Parent	4	No	Disagree	Disagree	Disagree	Disagree	Disagree	Disagree	Disagree	Disagree	Disagree	Disagree	Disagree	Disagree	Disagree	Disagree	Cultural beliefs and practices	0	0	0	0	0	1	0	0	0	Availability in local health facilities	0	0	0	0	0	0	1	0	0	424464560	9406cb4a-8f1a-44e5-a631-b7581c3ce099	2024-12-26 15:10:23
2024-12-26 16:10:22	2024-12-26 16:11:25	Female	41-50 years	Married	Tertiary	Christianity	Non healthcare sector	Parent	2	Yes	Agree	Agree	Agree	Agree	Agree	Agree	Agree	Agree	Agree	Agree	Agree	Agree	Agree	Agree	Cultural beliefs and practices	0	0	0	0	0	1	0	0	0	Health education and awareness campaigns	0	0	0	0	1	0	0	0	0	424464899	7f121efa-4779-418f-8c67-10acfd335f2b	2024-12-26 15:11:29
2024-12-26 16:11:25	2024-12-26 16:13:19	Male	51 years and above	Married	Primary	Christianity	Student	Parent	4	No	Disagree	Disagree	Disagree	Disagree	Disagree	Disagree	Disagree	Disagree	Disagree	Disagree	Disagree	Disagree	Disagree	Disagree	Lack of sufficient information about the vaccine Concerns about safety Concerns about effectiveness Cost of the vaccine Parental resistance Cultural beliefs and practices Limited availability of the vaccine Lack of trust in healthcare providers Negative media reports	1	1	1	1	1	1	1	1	1	Positive clinical trial results Endorsement by health authorities Cost effectiveness High demand from parents Health education and awareness campaigns Government support and subsidies Availability in local health facilities Trust in healthcare providers Positive media coverage	1	1	1	1	1	1	1	1	1	424465330	0f24de32-dbd4-4721-ba73-0ac9edb7203a	2024-12-26 15:13:20
2024-12-26 16:13:20	2024-12-26 16:15:07	Female	41-50 years	Married	Tertiary		Healthcare sector	Parent	2	Yes	Agree	Agree	Agree	Agree	Agree	Agree	Agree	Agree	Agree	Agree	Agree	Agree	Agree	Agree	Lack of sufficient information about the vaccine Concerns about safety Concerns about effectiveness Cost of the vaccine Parental resistance Cultural beliefs and practices Limited availability of the vaccine Lack of trust in healthcare providers Negative media reports	1	1	1	1	1	1	1	1	1	Positive clinical trial results Endorsement by health authorities Cost effectiveness High demand from parents Health education and awareness campaigns Government support and subsidies Availability in local health facilities Trust in healthcare providers Positive media coverage	1	1	1	1	1	1	1	1	1	424465913	5cdd36f7-8046-4808-8eb2-c55415959f4d	2024-12-26 15:15:08
2024-12-26 16:15:07	2024-12-26 16:16:21	Female	41-50 years	Married	Tertiary	Christianity	Non healthcare sector	Parent	2	No	Strongly disagree	Strongly disagree	Strongly disagree	Strongly disagree	Strongly disagree	Disagree	Disagree	Disagree	Disagree	Disagree	Disagree	Disagree	Disagree	Disagree	Lack of sufficient information about the vaccine Concerns about safety Concerns about effectiveness Cost of the vaccine Parental resistance Cultural beliefs and practices Limited availability of the vaccine Lack of trust in healthcare providers Negative media reports	1	1	1	1	1	1	1	1	1	Positive clinical trial results Endorsement by health authorities Cost effectiveness High demand from parents Health education and awareness campaigns Government support and subsidies Availability in local health facilities Trust in healthcare providers Positive media coverage	1	1	1	1	1	1	1	1	1	424466437	e4c44674-a172-4238-b9f0-4e0334e489f7	2024-12-26 15:16:23
2024-12-26 16:16:21	2024-12-26 16:17:40	Male	41-50 years	Married	Tertiary		Healthcare sector	Parent	4	Yes	Strongly agree	Strongly agree	Strongly agree		Strongly agree	Agree	Agree	Agree	Agree	Agree	Agree	Agree	Agree	Agree	Lack of sufficient information about the vaccine Concerns about safety Concerns about effectiveness Cost of the vaccine Parental resistance Cultural beliefs and practices Limited availability of the vaccine Lack of trust in healthcare providers Negative media reports	1	1	1	1	1	1	1	1	1	Positive clinical trial results Endorsement by health authorities Cost effectiveness High demand from parents Health education and awareness campaigns Government support and subsidies Availability in local health facilities Trust in healthcare providers Positive media coverage	1	1	1	1	1	1	1	1	1	424466756	f97adc2e-3f32-49d9-8429-207c2bbaa1a2	2024-12-26 15:17:41
2024-12-26 16:17:40	2024-12-26 16:19:08	Male	51 years and above	Married	Tertiary		Non healthcare sector	Parent	5 and above	Yes	Strongly disagree	Disagree		Disagree		Disagree	Disagree	Disagree		Disagree	Disagree	Disagree	Disagree	Disagree	Lack of sufficient information about the vaccine Concerns about safety Concerns about effectiveness Cost of the vaccine Parental resistance Cultural beliefs and practices Limited availability of the vaccine Lack of trust in healthcare providers Negative media reports	1	1	1	1	1	1	1	1	1	Positive clinical trial results Endorsement by health authorities Cost effectiveness High demand from parents Health education and awareness campaigns Government support and subsidies Availability in local health facilities Trust in healthcare providers Positive media coverage	1	1	1	1	1	1	1	1	1	424467086	800f3b23-ee5d-4a5e-becc-543348718a7f	2024-12-26 15:19:11
2024-12-26 16:19:08	2024-12-26 16:20:21	Female	51 years and above	Married	Secondary		Non healthcare sector	Parent	5 and above	Yes	Agree	Agree	Agree	Agree	Agree	Agree	Agree	Agree	Agree	Agree	Agree	Agree	Agree	Agree	Lack of sufficient information about the vaccine Concerns about safety Concerns about effectiveness Cost of the vaccine Parental resistance Cultural beliefs and practices Limited availability of the vaccine Lack of trust in healthcare providers Negative media reports	1	1	1	1	1	1	1	1	1	Positive clinical trial results Endorsement by health authorities Cost effectiveness High demand from parents Health education and awareness campaigns Government support and subsidies Availability in local health facilities Trust in healthcare providers Positive media coverage	1	1	1	1	1	1	1	1	1	424467404	da3d5e24-e956-4f2b-9cc3-4223ec470ce8	2024-12-26 15:20:22
2024-12-26 16:20:21	2024-12-26 16:21:25	Male	51 years and above	Married	Primary	Christianity	Unemployed	Parent	4	No	Disagree	Disagree	Disagree	Disagree	Disagree	Disagree	Disagree	Disagree	Disagree	Disagree	Disagree	Disagree	Disagree	Disagree	Lack of sufficient information about the vaccine Concerns about safety Concerns about effectiveness Cost of the vaccine Parental resistance Cultural beliefs and practices Limited availability of the vaccine Lack of trust in healthcare providers Negative media reports	1	1	1	1	1	1	1	1	1	Positive clinical trial results Endorsement by health authorities Cost effectiveness High demand from parents Health education and awareness campaigns Government support and subsidies Availability in local health facilities Trust in healthcare providers Positive media coverage	1	1	1	1	1	1	1	1	1	424467656	316b3022-ea1d-4509-bf40-d6b6c70b5594	2024-12-26 15:21:26
2024-12-26 16:21:25	2024-12-26 16:22:42	Female	51 years and above	Married	Primary	Christianity	Unemployed	Parent	5 and above	No	Agree	Agree	Agree	Agree	Agree	Agree	Agree	Agree	Agree	Agree	Disagree	Agree	Agree	Agree	Lack of sufficient information about the vaccine Cost of the vaccine Cultural beliefs and practices Limited availability of the vaccine	1	0	0	1	0	1	1	0	0	Positive clinical trial results Availability in local health facilities Positive media coverage	1	0	0	0	0	0	1	0	1	424467970	31225a97-cfd3-45db-9b33-b4241cf90bda	2024-12-26 15:22:43
2024-12-26 16:22:42	2024-12-26 16:24:25	Female	31-40 years	Married	Tertiary	Christianity	Healthcare sector	Parent	1	Yes	Agree	Strongly disagree	Agree	Strongly disagree	Agree	Agree	Agree	Agree	Strongly agree	Strongly disagree	Agree	Agree	Disagree	Strongly agree	Concerns about effectiveness Parental resistance	0	0	1	0	1	0	0	0	0	Positive clinical trial results Endorsement by health authorities Cost effectiveness Health education and awareness campaigns Government support and subsidies Availability in local health facilities	1	1	1	0	1	1	1	0	0	424468503	20cb5570-997b-4e95-a611-1d3344dc207f	2024-12-26 15:24:26
2024-12-26 16:24:25	2024-12-26 16:29:13	Male	31-40 years	Married	Tertiary	Christianity	Non healthcare sector	Parent	1	No	Agree	Agree	Agree	Agree	Agree	Agree	Agree	Agree	Agree	Agree	Agree	Agree	Agree	Agree	Cost of the vaccine Limited availability of the vaccine	0	0	0	1	0	0	1	0	0	Positive clinical trial results Endorsement by health authorities Cost effectiveness Availability in local health facilities Trust in healthcare providers	1	1	1	0	0	0	1	1	0	424469606	c0d78a63-e271-4b7c-965f-47f81ef728a6	2024-12-26 15:29:14
2024-12-26 16:29:14	2024-12-26 16:33:28	Female	21-30 years	Married	Tertiary	Christianity	Non healthcare sector	Parent	1	No	Agree	Strongly disagree	Agree	Agree	Agree	Agree	Agree	Agree	Agree	Agree	Agree	Agree	Agree	Agree	Lack of sufficient information about the vaccine	1	0	0	0	0	0	0	0	0	Endorsement by health authorities	0	1	0	0	0	0	0	0	0	424470613	3ffc9e7e-481c-4b8d-aa37-8dc71c2df806	2024-12-26 15:33:28
2024-12-26 16:33:28	2024-12-26 16:34:33	Female	41-50 years	Married	Tertiary	Christianity	Non healthcare sector	Parent	1	No	Agree	Agree	Agree	Agree	Agree	Disagree	Agree	Agree	Agree	Agree	Agree	Agree	Agree	Agree	Lack of sufficient information about the vaccine	1	0	0	0	0	0	0	0	0	Trust in healthcare providers	0	0	0	0	0	0	0	1	0	424470873	1c2f65e7-51f1-4910-9a60-d47e8de421e4	2024-12-26 15:34:33
2024-12-26 16:34:33	2024-12-26 16:35:42	Female	31-40 years	Single	Secondary	Christianity	Student	Sibling		Yes	Agree	Agree	Agree	Agree	Agree	Agree	Agree	Agree	Agree	Agree	Agree	Agree	Agree	Agree	Limited availability of the vaccine	0	0	0	0	0	0	1	0	0	Availability in local health facilities	0	0	0	0	0	0	1	0	0	424471126	a6e2c673-cf95-41b4-9329-fe4e8994102d	2024-12-26 15:35:42
2024-12-26 16:35:43	2024-12-26 16:37:01	Female	51 years and above	Married	Tertiary	Christianity	Non healthcare sector	Grandparent	5 and above	Yes	Agree	Agree	Agree	Agree	Agree	Agree	Agree	Agree	Agree	Agree	Agree	Agree	Agree	Agree	Lack of sufficient information about the vaccine Concerns about effectiveness Cost of the vaccine Parental resistance Limited availability of the vaccine Negative media reports	1	0	1	1	1	0	1	0	1	Positive clinical trial results Endorsement by health authorities Cost effectiveness Government support and subsidies Availability in local health facilities Trust in healthcare providers Positive media coverage	1	1	1	0	0	1	1	1	1	424471549	9858bb4e-6155-435d-9882-3256757156d8	2024-12-26 15:37:01
2024-12-26 16:37:02	2024-12-26 16:38:21		41-50 years	Married	Secondary	Christianity	Unemployed	Parent	3	Yes	Agree	Agree	Agree	Agree	Agree	Agree	Agree	Agree	Agree	Agree	Agree	Agree	Agree	Agree	Lack of sufficient information about the vaccine Concerns about safety Limited availability of the vaccine	1	1	0	0	0	0	1	0	0	Positive clinical trial results Endorsement by health authorities Health education and awareness campaigns Government support and subsidies Availability in local health facilities Trust in healthcare providers Positive media coverage	1	1	0	0	1	1	1	1	1	424471853	01154eec-1b59-4196-a8b4-47508cd7f7c9	2024-12-26 15:38:21
2024-12-26 16:38:22	2024-12-26 16:40:18	Female	31-40 years	Married	Tertiary	Christianity	Non healthcare sector	Parent	5 and above	No	Agree	Agree	Agree	Strongly agree	Agree	Agree	Agree	Agree	Strongly agree	Agree	Agree	Agree	Agree	Strongly agree	Lack of sufficient information about the vaccine Concerns about safety Concerns about effectiveness Cost of the vaccine	1	1	1	1	0	0	0	0	0	Positive clinical trial results Endorsement by health authorities Government support and subsidies Availability in local health facilities	1	1	0	0	0	1	1	0	0	424472294	a70eb160-b1ad-4531-96a5-f24f3a1cef18	2024-12-26 15:40:17
2024-12-26 16:40:18	2024-12-26 16:41:17	Female	31-40 years	Married	Tertiary	Christianity	Non healthcare sector	Parent	4	No	Agree	Agree	Agree	Agree	Agree	Agree	Agree	Agree	Agree	Agree	Agree	Agree	Agree		Lack of sufficient information about the vaccine	1	0	0	0	0	0	0	0	0	Availability in local health facilities	0	0	0	0	0	0	1	0	0	424472565	0f871c59-9b3e-4ec6-bbc5-a6f84029aea4	2024-12-26 15:41:16
2024-12-26 16:41:17	2024-12-26 16:42:22	Female	41-50 years	Married	Tertiary	Christianity	Healthcare sector	Guardian	5 and above	Yes	Strongly agree	Agree	Agree	Agree	Strongly agree	Strongly agree	Strongly agree	Agree	Agree	Agree	Agree	Strongly agree	Agree	Agree	Lack of sufficient information about the vaccine	1	0	0	0	0	0	0	0	0	Government support and subsidies	0	0	0	0	0	1	0	0	0	424472855	d83b2dc2-7e45-4a79-bbf6-258758ddcdab	2024-12-26 15:42:21
2024-12-26 16:42:22	2024-12-26 16:44:08	Female	31-40 years	Married	Tertiary	Christianity	Non healthcare sector	Parent	1	Yes	Strongly agree	Agree	Agree	Agree	Agree	Agree	Agree	Strongly disagree	Agree	Agree	Agree	Strongly agree	Strongly agree	Strongly agree	Lack of sufficient information about the vaccine Concerns about safety Cost of the vaccine Limited availability of the vaccine Negative media reports	1	1	0	1	0	0	1	0	1	Positive clinical trial results Endorsement by health authorities Cost effectiveness Health education and awareness campaigns Government support and subsidies Availability in local health facilities Trust in healthcare providers Positive media coverage	1	1	1	0	1	1	1	1	1	424473412	2b2cda7d-4c4f-40dc-9340-2e5125209caa	2024-12-26 15:44:08
2024-12-26 16:44:08	2024-12-26 16:45:46	Female	21-30 years	Married	Tertiary	Christianity	Student	Parent	1	Yes	Agree	Agree	Agree	Agree	Agree	Agree	Agree	Agree	Strongly agree	Agree	Agree	Agree	Agree	Agree	Lack of sufficient information about the vaccine Cultural beliefs and practices Lack of trust in healthcare providers Negative media reports	1	0	0	0	0	1	0	1	1	Endorsement by health authorities Trust in healthcare providers Positive media coverage	0	1	0	0	0	0	0	1	1	424473902	45977366-09bb-4be2-a051-63c711204e1e	2024-12-26 15:45:46
2024-12-26 16:45:46	2024-12-26 16:47:06	Female	51 years and above	Single	Tertiary	Christianity	Non healthcare sector	Parent	1	Yes	Agree	Disagree	Agree	Strongly agree	Agree	Agree	Agree	Agree	Strongly agree	Agree	Agree	Agree	Agree	Strongly agree	Cost of the vaccine	0	0	0	1	0	0	0	0	0	Health education and awareness campaigns	0	0	0	0	1	0	0	0	0	424474322	66d07f4a-2182-4f04-9ff2-8f45f117646b	2024-12-26 15:47:07
2024-12-26 16:47:06	2024-12-26 16:48:06	Female	41-50 years	Married	Tertiary	Christianity	Healthcare sector	Parent	2	Yes	Agree	Agree	Agree	Agree	Agree	Agree	Disagree	Strongly agree	Strongly agree	Agree	Strongly agree	Agree	Agree	Strongly agree	Limited availability of the vaccine	0	0	0	0	0	0	1	0	0	Availability in local health facilities	0	0	0	0	0	0	1	0	0	424474701	ff3acb4f-0b0d-4a89-804e-a3af67086255	2024-12-26 15:48:06
2024-12-26 16:48:06	2024-12-26 16:49:57	Female	41-50 years	Married	Secondary	Christianity	Student	Guardian	1	No		Agree	Disagree			Agree		Disagree	Agree	Agree	Disagree	Disagree	Disagree	Disagree	Lack of sufficient information about the vaccine	1	0	0	0	0	0	0	0	0	Health education and awareness campaigns	0	0	0	0	1	0	0	0	0	424475370	be77431f-6159-429e-9a97-bfaf6c8b323f	2024-12-26 15:50:01
2024-12-26 16:49:57	2024-12-26 16:50:59	Female	41-50 years	Married	Secondary	Christianity	Non healthcare sector	Parent	5 and above	No		Strongly agree													Lack of sufficient information about the vaccine Concerns about safety Concerns about effectiveness	1	1	1	0	0	0	0	0	0	Positive clinical trial results Health education and awareness campaigns	1	0	0	0	1	0	0	0	0	424475652	9b9e60d6-ebf6-4bc5-8da2-ca139af4b888	2024-12-26 15:51:00
2024-12-26 16:50:59	2024-12-26 16:52:13	Female	51 years and above	Married	Tertiary	Christianity	Healthcare sector	Guardian	4	No	Disagree	Disagree	Disagree	Disagree	Disagree	Disagree	Disagree	Disagree	Disagree	Disagree	Disagree	Disagree	Disagree	Disagree	Lack of sufficient information about the vaccine	1	0	0	0	0	0	0	0	0	Health education and awareness campaigns	0	0	0	0	1	0	0	0	0	424475968	90d71c93-630f-42ce-8bf5-89affb7444cf	2024-12-26 15:52:14
[truncated: 6 more columns]
